# Supplementary material for: Phosphine-catalyzed enantioselective [4 + 1] annulation of oxindoles with allenic ketones for the construction of spirocyclopentene oxindoles
Source: Royal Society of Chemistry journal article supplement (doi:10.1039/d1qo00669j), 2021-01-01
Supplement: d1qo00669j1.pdf [file d1qo00669j1.pdf]

## Phosphine-Catalyzed Enantioselective [4 + 1] Annulation of Oxindoles and Allenic Ketones: Constructing Five-Membered Rings with Weak Dinucleophiles

Xiaodong Tang,<sup>a,b</sup> Huanzhen Ni,<sup>a</sup> Yixin Lu\*,<sup>a,b,c</sup>

<sup>a</sup>Department of Chemistry, National University of Singapore, 3 Science Drive 3, 117543 Singapore

<sup>b</sup>National University of Singapore (Suzhou) Research Institute, 377 Lin Quan Street, Suzhou Industrial Park, Suzhou, Jiangsu, 215123, PR China

<sup>c</sup>Joint School of National University of Singapore and Tianjin University, International Campus of Tianjin University, Binhai New City, Fuzhou, Fujian, 359297, PR China

---

---

\*Email: [chmlyx@nus.edu.sg](mailto:chmlyx@nus.edu.sg)

|                                                                          |     |
|--------------------------------------------------------------------------|-----|
| A. General Information .....                                             | S2  |
| B. Representative procedure for enantioselective [4 + 1] Annulation..... | S3  |
| C. Procedure of total synthesis of (+)-Debromoflustramie B.....          | S3  |
| D. Analytical Data and HPLC Chromatograms of the Products.....           | S6  |
| E. <sup>1</sup> H and <sup>13</sup> C NMR spectra .....                  | S35 |
| F. References .....                                                      | S57 |

## A. General Information

Unless otherwise specified, all reactions were conducted under an inert atmosphere and anhydrous conditions. All the solvents were purified according to the standard procedures. All chemicals which are commercially available were employed without further purification. Thin-layer chromatography (TLC) was performed on silica gel plates (60F-254) using UV-light (254 and 365 nm). Flash chromatography was conducted on silica gel (200–300 mesh).  $^1\text{H}$  and  $^{13}\text{C}$  NMR spectra were recorded at ambient temperature in  $\text{CDCl}_3$  on a Bruker AMX500 (500 MHz) or AMX400 (400 MHz) spectrometer. Chemical shifts were reported in parts per million (ppm). The data are reported as follows: for  $^1\text{H}$  NMR, chemical shift in ppm from tetramethylsilane with the solvent as internal standard ( $\text{CDCl}_3$   $\delta$  7.26 ppm), multiplicity (s = singlet, d = doublet, t = triplet, q = quartet, m = multiplet or overlap of non-equivalent resonances), integration; for  $^{13}\text{C}$  NMR, chemical shift in ppm from tetramethylsilane with the solvent as internal indicator ( $\text{CDCl}_3$   $\delta$  77.1 ppm), multiplicity with respect to protons. All high-resolution mass spectra were performed by the MS service at the chemistry department, National University of Singapore, and were obtained on a Finnigan/MAT 95XL-T spectrometer to be given in  $m/z$ . Optical rotations were measured using an Anton Paar MCP-100 digital polarimeter using a 1 cm glass cell. Enantiomeric excesses were determined by HPLC analysis on a chiral stationary phase using CHIRALPAK® columns (IA and ID) eluting with hexane/isopropanol mixtures as indicated. Allenic ketones and catalysts were synthesized by following our previously reported procedures<sup>1,3</sup>. *N*-Protected oxindoles **2** were synthesized according to the literature-reported procedures<sup>2</sup>.

## B. Representative procedure for enantioselective [4 + 1] Annulation

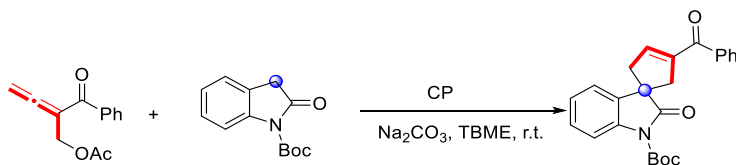

To a 4 mL reaction vial, sodium carbonate (0.1 mmol) and chiral phosphine catalyst (0.02 mmol) and Boc-protected oxindole (0.1 mmol) were added to 2.0 mL of *t*-Butyl methyl ether, then 2-benzoylbuta-2,3-dien-1-yl acetate (0.12 mmol) was injected slowly into the stirring solution using a micro-syringe. The reaction vial was left to stir at -35 °C until the allene has been fully consumed. The solution was then purified using a column chromatography (Hexane:Ethyl acetate = 20:1) to yield a yellow solid as the cyclized product.

## C. Procedure of total synthesis of (+)-Debromoflustramine B

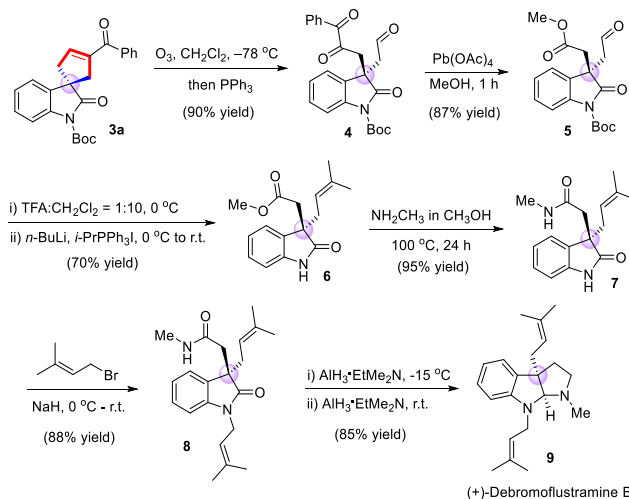

To a 50 mL round-bottle flask, sodium carbonate (424 mg, 4 mmol) and chiral phosphine catalyst (532 mg, 0.8 mmol) and Boc-protected oxindole (932 mg, 4 mmol) were added to 20.0 mL of *t*-Butyl methyl ether, then 2-benzoylbuta-2,3-dien-1-yl acetate (768 mg, 4.8 mmol) was injected slowly into the stirring solution using a micro-syringe under -35°C. The reaction vial was left to stir at -35 °C until the allene has been fully consumed. The solution was then purified using a column chromatography

(Hexane:Ethyl acetate = 20:1) to yield a yellow solid as the cyclized product 1.1 g, 71% yield, 92% *ee*.

To a solution of **3a** (389 mg, 1 mmol) in CH<sub>2</sub>Cl<sub>2</sub> (10 mL), ozone was bubbled into the solution under -78 °C (dry ice - acetone bath). Ozone was stopped after the solution turned to light blue, and oxygen was bubbled into the reaction until the blue color disappeared. The reaction was allowed to warm to room temperature, and triphenyl phosphine (262 mg, 1 mmol) was added into the reaction. The reaction mixture was stirred for one hour, then removed the solvent, and the residue was purified by silica gel column (Hexane:Ethyl acetate = 4:1), yielding product **4** in 379 mg (90%).

To a solution of **4** in methanol (10 mL), lead tetraacetate (443 mg, 1 mmol) was added under 0 °C. The reaction was complete in one hour then filtered with celite pad and washed the pad with ethyl acetate. The organic solvent was removed in vacuum, and the residue was purified with silica gel column (Hexane:Ethyl acetate = 2:1). **5** was obtained in 272 mg, 87% yield.

To a solution of **5** in dichloromethane (3 mL), trifluoro acid (0.3 mL) was added under 0 °C. The reaction mixture was stirred for 1 hour, then the reaction mixture was evaporated to dryness, the residue used directly without further purification.

To a witting precursor (743 mg, 1.7 mmol) in THF solution, *n*-butyl lithium (0.85 mL, 1.7 mmol) was added in dropwise with ice bath. An Aldehyde **5** solution in THF was added after 40 mins. Stirring for 3 hours, the reaction was quenched by water and extracted by ethyl acetate, brine and dried over sodium sulphate. After remove the solvent, the residue was purified by silica gel column (Hexane:Ethyl acetate = 4:1). **6** was obtained in 150 mg, 70% yield.

To a seal tube, intermediate **6** (150 mg, 0.55 mmol) was dissolved in methanol solution containing methyl amine (33 % w/w). Heating the solution to 100 °C for 24h, the solvent was removed in vacuum, and the residue purified with silica gel column (CH<sub>2</sub>Cl<sub>2</sub>: MeOH = 95:5). **7** was obtained in 142 mg, 95% yield.

To a solution of **7** (0.52 mmol) in THF 5 mL, sodium hydride (51.2 mg, 1.28 mmol 60% in mineral oil) was added under 0 °C. After stirred 30 mins, 1-bromo-3-methylbut-2-ene (0.52 mmol) was added to the reaction mixture, then warm to room temperature. The reaction completed in one hour and was quenched with water. Removing the solvent in vacuum, the residue was purified with silica gel column (Hexane:Ethyl acetate = 2 :1). **8** was obtained in 156 mg, 88% yield.

An oven-dried round-bottomed flask containing a stirring bar was charged with **8** (156 mg, 0.458 mmol), and placed under a protective argon atmosphere. Anhydrous THF (10 mL) was added and the mixture was cooled to -15 °C followed by the addition of AlH<sub>3</sub>·EtMe<sub>2</sub>N (0.5 M in THF, 5 mL, 2.2 mmol) via syringe. The mixture was stirred for 5 min then treated with THF:H<sub>2</sub>O = 1:1 (50 mL) at the same temperature and stirred for 15 min, filtered through celite and concentrated in vacuo to give a residue that was dissolved in EtOAc washed with sat. aq. Na<sub>2</sub>CO<sub>3</sub>, dried over MgSO<sub>4</sub> and concentrated in vacuo to yield an oily residue. Anhydrous THF (10 mL) was added and the mixture was let stir at room temperature for 5 min followed by the addition of AlH<sub>3</sub>·EtMe<sub>2</sub>N (0.5 M in THF, 2.5 mL, 1.1 mmol) via syringe. The mixture was stirred for 5 min then treated with THF : H<sub>2</sub>O = 1:1 (25 mL) and stirred for 15 min, filtered through celite and concentrated in vacuo to give a residue that was dissolved in EtOAc washed with sat.

aq.  $\text{Na}_2\text{CO}_3$  dried over  $\text{MgSO}_4$  and concentrated in vacuo to yield an oily residue which was purified via column chromatography  $\text{CH}_2\text{Cl}_2:\text{MeOH} = 95:5$ , (+)-Debromoflustramine B was obtained in 120 mg 85%.<sup>4</sup>

#### D. Analytical Data and HPLC Chromatograms of the Products

*tert*-Butyl (*R*)-3-benzoyl-2'-oxospiro[cyclopentane-1,3'-indolin]-3-ene-1'-carboxylate  
**3a**

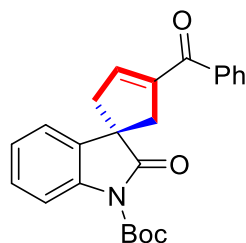

According to general [4 + 1] annulation procedure, **3a** was obtained in 95% yield (37.0 mg) as a white solid and 92% *ee*.  $[\alpha]_{\text{D}}^{25} = 1.7$  (*c* 1.0,  $\text{CHCl}_3$ ). The *ee* was determined by chiral stationary phase HPLC analysis [Daicel Chiralpak IC, isopropanol/hexane = 20/80, 1.0 mL/min,  $\lambda = 254$  nm,  $t_{\text{R}}$  (major) = 32.6 min,  $t_{\text{R}}$  (minor) = 11.8 min].  $^1\text{H}$  NMR (500 MHz,  $\text{CDCl}_3$ )  $\delta$  7.86 (m, 3H), 7.59 (m, 1H), 7.50 (t,  $J = 7.6$  Hz, 2H), 7.33 (m, 2H), 7.19 (m, 1H), 6.59 (m, 1H), 3.48 (dd,  $J = 16.7, 2.2$  Hz, 1H), 3.39 (m, 1H), 3.15 (dd,  $J = 16.7, 1.2$  Hz, 1H), 2.95 (m, 1H), 1.69 (s, 9H).  $^{13}\text{C}$  NMR (126 MHz,  $\text{CDCl}_3$ )  $\delta$  192.6, 179.2, 149.2, 142.1, 142.0, 138.4, 138.3, 134.4, 132.2, 128.9, 128.4, 128.3, 125.0, 121.8, 115.0, 84.5, 52.1, 47.0, 45.4, 28.1. HRMS (ESI)  $m/z$  calcd for  $\text{C}_{24}\text{H}_{22}\text{NO}_4$   $[\text{M} + \text{Na}]^+ = 412.1519$ , found: 412.1524.

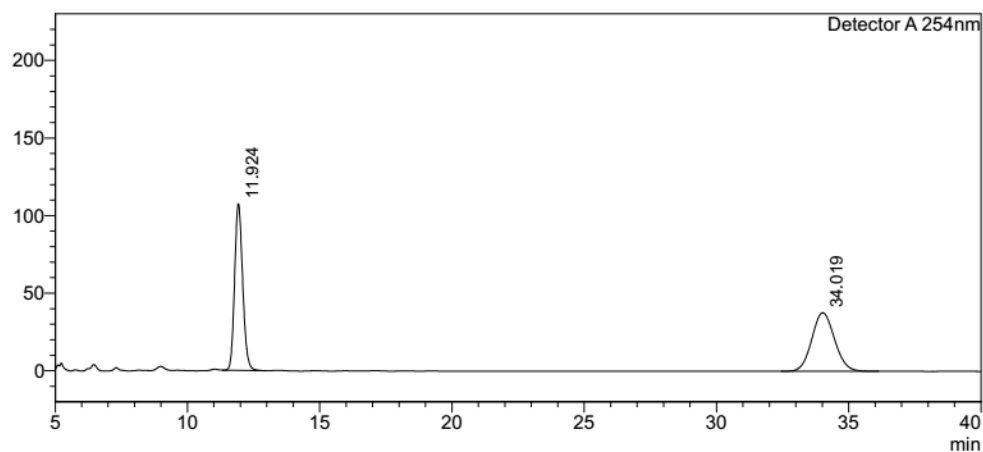

<Peak Table>

| Detector A 254nm |           |         |        |        |      |      |      |
|------------------|-----------|---------|--------|--------|------|------|------|
| Peak#            | Ret. Time | Area    | Height | Conc.  | Unit | Mark | Name |
| 1                | 11.924    | 2280057 | 107464 | 50.294 |      | M    |      |
| 2                | 34.019    | 2253363 | 37722  | 49.706 |      |      |      |
| Total            |           | 4533420 | 145186 |        |      |      |      |

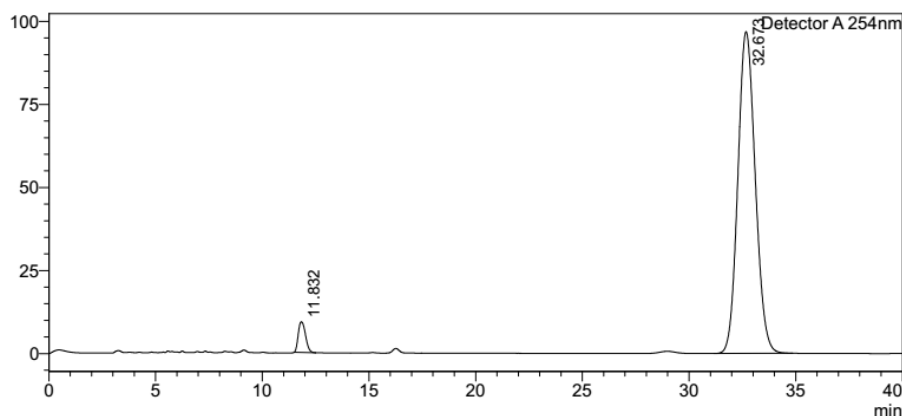

<Peak Table>

| Detector A 254nm |           |         |        |        |      |      |      |
|------------------|-----------|---------|--------|--------|------|------|------|
| Peak#            | Ret. Time | Area    | Height | Conc.  | Unit | Mark | Name |
| 1                | 11.832    | 217597  | 9241   | 3.810  |      | M    |      |
| 2                | 32.673    | 5492888 | 96858  | 96.190 |      |      |      |
| Total            |           | 5710485 | 106099 |        |      |      |      |

*tert*-Butyl (R)-3-benzoyl-5'-fluoro-2'-oxospiro[cyclopentane-1,3'-indolin]-3-ene-1'-carboxylate **3b**

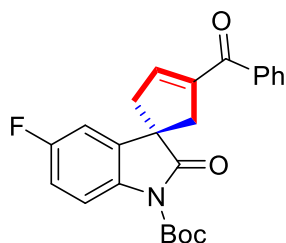

According to general [4 + 1] annulation procedure, **3b** was obtained in 94% yield (38.3 mg) as a white solid and 93% *ee*.  $[\alpha]_D^{25} = -3.7$  (c 1.0, CHCl<sub>3</sub>). The *ee* was determined by chiral stationary phase HPLC analysis [Daicel Chiralpak IC, isopropanol/hexane =

20/80, 1.0 mL/min,  $\lambda = 254$  nm,  $t_R$  (major) = 26.3 min,  $t_R$  (minor) = 16.5 min].  $^1\text{H}$  NMR (500 MHz,  $\text{CDCl}_3$ )  $\delta$  7.89 – 7.81 (m, 3H), 7.63 – 7.58 (m, 1H), 7.51 (t,  $J = 7.6$  Hz, 2H), 7.03 (d,  $J = 8.3$  Hz, 2H), 6.59 (d,  $J = 2.1$  Hz, 1H), 3.44 (ddd,  $J = 21.1, 17.8, 2.2$  Hz, 2H), 3.14 (dd,  $J = 16.8, 1.1$  Hz, 1H), 2.99 – 2.90 (m, 1H), 1.68 (s, 9H).  $^{13}\text{C}$  NMR (126 MHz,  $\text{CDCl}_3$ )  $\delta$  192.4, 178.7, 178.7, 161.4, 161.2, 160.0, 159.3, 154.7, 149.1, 141.9, 141.8, 138.1, 136.0, 135.9, 134.3, 132.3, 128.9, 128.4, 116.5, 116.4, 115.0, 114.8, 109.4, 109.2, 84.7, 52.3, 46.9, 45.3, 28.1. HRMS (ESI)  $m/z$  calcd for  $\text{C}_{24}\text{H}_{22}\text{FNO}_4$   $[\text{M} + \text{Na}]^+ = 430.1425$ , found: 430.1431.

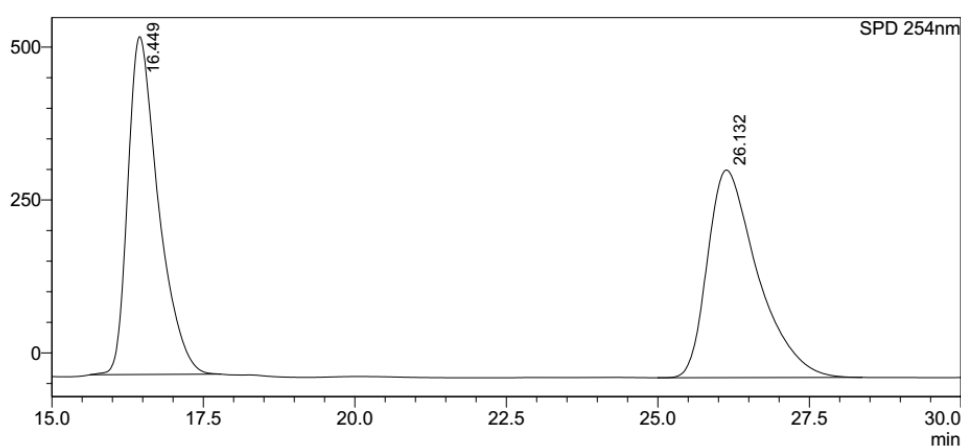

**<Peak Table>**

SPD 254nm

| Peak# | Ret. Time | Area     | Height | Conc.  | Unit | Mark | Name |
|-------|-----------|----------|--------|--------|------|------|------|
| 1     | 16.449    | 19436416 | 552561 | 49.878 |      | M    |      |
| 2     | 26.132    | 19531632 | 339376 | 50.122 |      | M    |      |
| Total |           | 38968048 | 891937 |        |      |      |      |

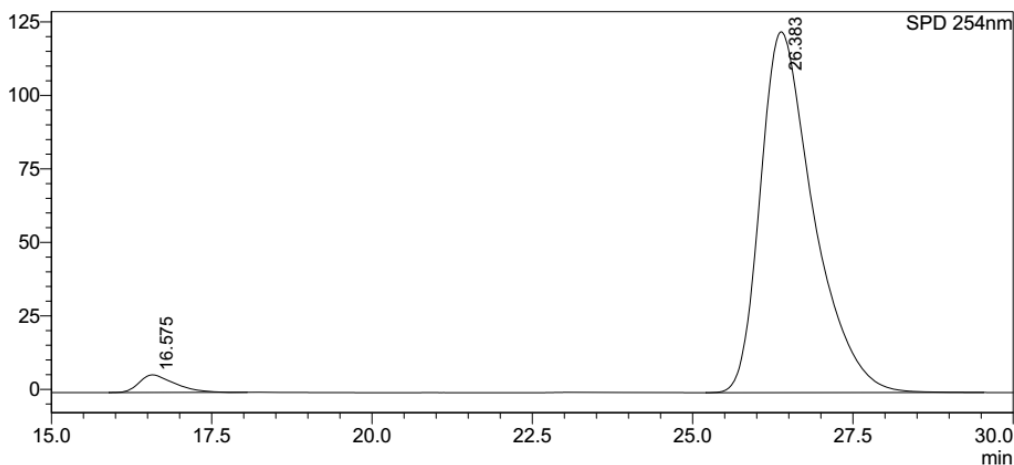

**<Peak Table>**

SPD 254nm

| Peak# | Ret. Time | Area    | Height | Conc.  | Unit | Mark | Name |
|-------|-----------|---------|--------|--------|------|------|------|
| 1     | 16.575    | 229426  | 5987   | 3.141  |      |      |      |
| 2     | 26.383    | 7075262 | 122769 | 96.859 |      |      |      |
| Total |           | 7304688 | 128756 |        |      |      |      |



*tert*-Butyl (R)-3-benzoyl-5'-chloro-2'-oxospiro[cyclopentane-1,3'-indolin]-3-ene-1'-carboxylate **3c**

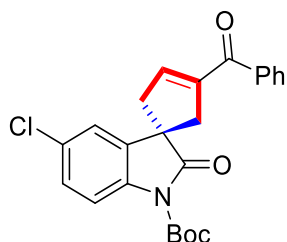

According to general [4 + 1] annulation procedure, **3c** was obtained in 90% yield (38.2 mg) as a white solid and 91% *ee*.  $[\alpha]_D^{25} = 11.8$  (c 1.0, CHCl<sub>3</sub>). The *ee* was determined by chiral stationary phase HPLC analysis [Daicel Chiralpak IC, isopropanol/hexane = 20/80, 1.0 mL/min,  $\lambda = 254$  nm,  $t_R$  (major) = 16.8 min,  $t_R$  (minor) = 13.9 min]. <sup>1</sup>H NMR (500 MHz, CDCl<sub>3</sub>)  $\delta$  7.95 (d,  $J = 1.8$  Hz, 1H), 7.84 (m, 2H), 7.59 (m, 3.7 Hz, 1H), 7.50 (t,  $J = 7.6$  Hz, 2H), 7.23 (d,  $J = 8.0$  Hz, 1H), 7.17 (m, 1H), 6.58 (m, 1H), 3.46 (m, 1H), 3.37 (m, 1H), 3.12 (dd,  $J = 16.7, 1.0$  Hz, 1H), 2.92 (d,  $J = 18.9$  Hz, 1H), 1.69 (s, 9H). <sup>13</sup>C NMR (126 MHz, CDCl<sub>3</sub>)  $\delta$  192.4, 178.6, 148.9, 142.0, 141.7, 139.4, 138.2, 134.1, 132.7, 132.3, 128.9, 128.4, 125.0, 122.6, 115.8, 85.0, 51.9, 47.0, 45.3, 28.0. HRMS (ESI)  $m/z$  calcd for C<sub>24</sub>H<sub>22</sub>ClNO<sub>4</sub> [M + Na]<sup>+</sup> = 446.1130, found:446.1143.

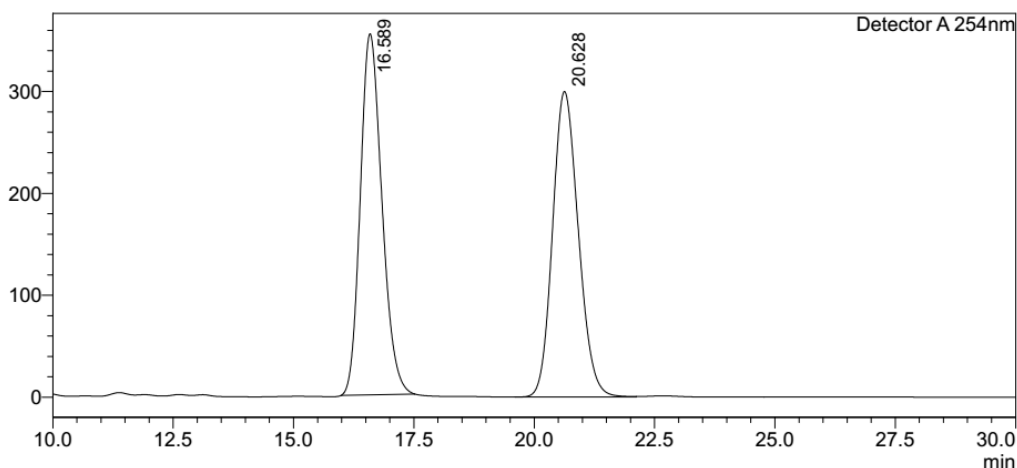

**<Peak Table>**

Detector A 254nm

| Peak# | Ret. Time | Area     | Height | Conc.  | Unit | Mark | Name |
|-------|-----------|----------|--------|--------|------|------|------|
| 1     | 16.589    | 11056170 | 354263 | 49.738 |      | M    |      |
| 2     | 20.628    | 11172492 | 299887 | 50.262 |      |      |      |
| Total |           | 22228662 | 654151 |        |      |      |      |

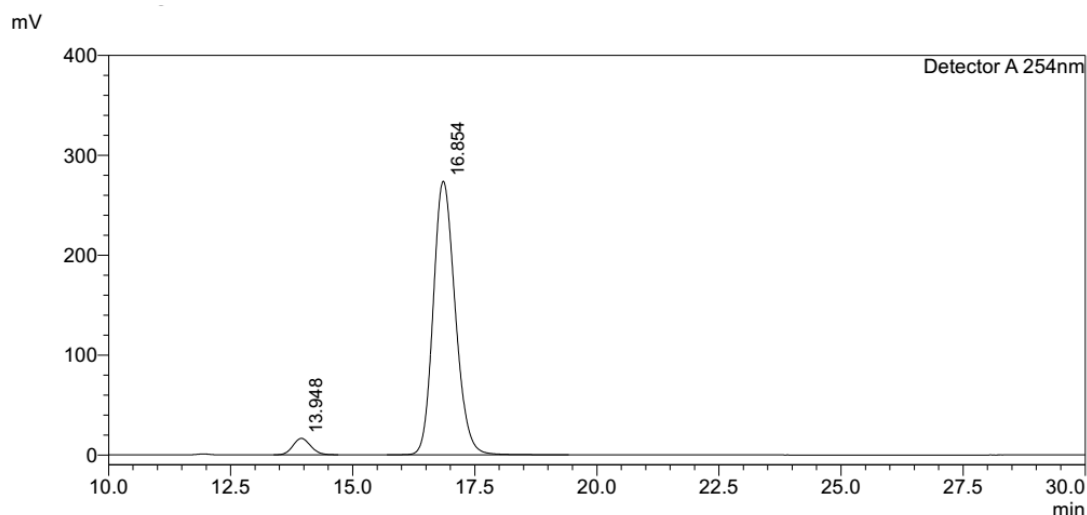

<Peak Table>

| Detector A 254nm |           |         |        |        |      |      |      |
|------------------|-----------|---------|--------|--------|------|------|------|
| Peak#            | Ret. Time | Area    | Height | Conc.  | Unit | Mark | Name |
| 1                | 13.948    | 417873  | 16509  | 4.636  |      | M    |      |
| 2                | 16.854    | 8595046 | 274096 | 95.364 |      |      |      |
| Total            |           | 9012919 | 290606 |        |      |      |      |

tert-Butyl (R)-3-benzoyl-5'-bromo-2'-oxospiro[cyclopentane-1,3'-indolin]-3-ene-1'-carboxylate **3d**

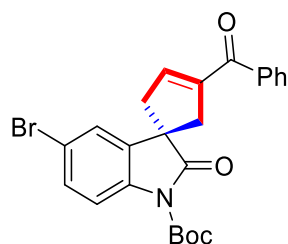

According to general [4 + 1] annulation procedure, **3d** was obtained in 85% yield (39.8 mg) as a white solid and 90% *ee*.  $[\alpha]_D^{25} = 1.7$  (c 1.0, CHCl<sub>3</sub>). The *ee* was determined by chiral stationary phase HPLC analysis [Daicel Chiralpak IC, isopropanol/hexane = 20/80, 1.0 mL/min,  $\lambda = 254$  nm,  $t_R$  (major) = 17.0 min,  $t_R$  (minor) = 15.5 min]. <sup>1</sup>H NMR (500 MHz, CDCl<sub>3</sub>)  $\delta$  7.85 (d,  $J = 8.1$  Hz, 2H), 7.78 (d,  $J = 8.7$  Hz, 1H), 7.60 (m, 1H), 7.51 (t,  $J = 7.6$  Hz, 2H), 7.46 (dd,  $J = 8.7, 2.0$  Hz, 1H), 7.41 (d,  $J = 1.9$  Hz, 1H), 6.59 (s, 1H), 3.47 (dd,  $J = 16.8, 2.1$  Hz, 1H), 3.39 (dd,  $J = 18.9, 2.1$  Hz, 1H), 3.14 (dd,  $J = 16.8, 1.0$  Hz, 1H), 2.94 (d,  $J = 18.9$  Hz, 1H), 1.67 (s, 9H). <sup>13</sup>C NMR (126 MHz, CDCl<sub>3</sub>)  $\delta$  192.4, 178.3, 148.9, 141.9, 141.8, 138.1, 137.5, 136.4, 132.4, 131.4, 128.9, 128.4, 125.0, 117.9, 116.8, 84.9, 52.0, 47.0, 45.4, 28.0. HRMS (ESI)  $m/z$  calcd for C<sub>24</sub>H<sub>22</sub>BrNO<sub>4</sub> [M + Na]<sup>+</sup> = 490.0624, found:490.0625.

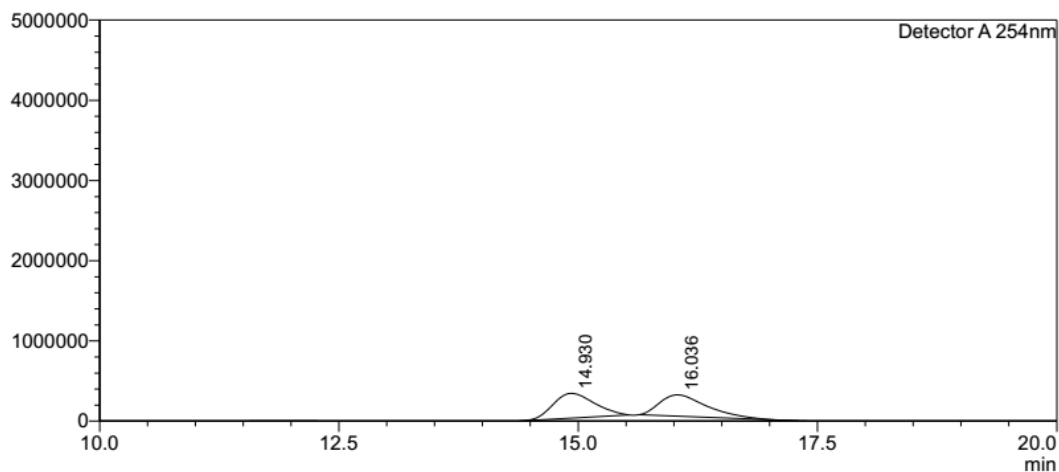

**<Peak Table>**

| Detector A 254nm |           |          |        |        |      |      |      |
|------------------|-----------|----------|--------|--------|------|------|------|
| Peak#            | Ret. Time | Area     | Height | Conc.  | Unit | Mark | Name |
| 1                | 14.930    | 9250727  | 307599 | 50.032 |      | M    |      |
| 2                | 16.036    | 9238912  | 266388 | 49.968 |      | M    |      |
| Total            |           | 18489639 | 573988 |        |      |      |      |

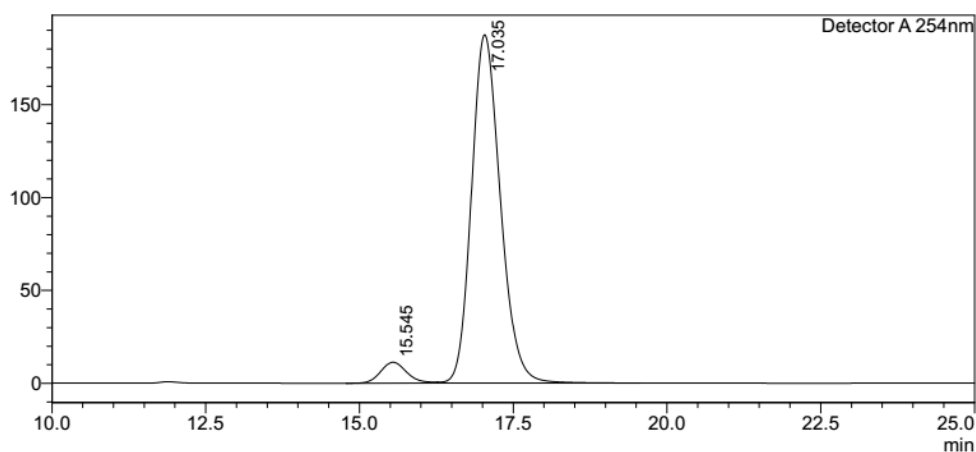

**<Peak Table>**

| Detector A 254nm |           |         |        |        |      |      |      |
|------------------|-----------|---------|--------|--------|------|------|------|
| Peak#            | Ret. Time | Area    | Height | Conc.  | Unit | Mark | Name |
| 1                | 15.545    | 335019  | 11287  | 5.182  |      |      |      |
| 2                | 17.035    | 6129529 | 187570 | 94.818 |      | V    |      |
| Total            |           | 6464548 | 198857 |        |      |      |      |

*tert*-Butyl (R)-3-benzoyl-5'-methyl-2'-oxospiro[cyclopentane-1,3'-indolin]-3-ene-1'-carboxylate **3e**

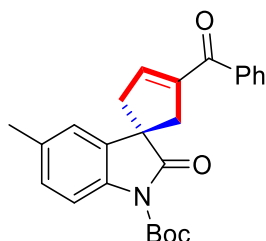

According to general [4 + 1] annulation procedure, **3e** was obtained in 80% yield (32.3 mg) as a white solid and 92% *ee*.  $[\alpha]_D^{25} = -5.1$  (c 1.0, CHCl<sub>3</sub>). The *ee* was determined by chiral stationary phase HPLC analysis [Daicel Chiralpak IC, isopropanol/hexane =

20/80, 1.0 mL/min,  $\lambda = 254$  nm,  $t_R$  (major) = 30.8 min,  $t_R$  (minor) = 12.9 min].  $^1\text{H}$  NMR (500 MHz,  $\text{CDCl}_3$ )  $\delta$  7.86 (m, 2H), 7.73 (d,  $J = 8.3$  Hz, 1H), 7.59 (d,  $J = 7.4$  Hz, 1H), 7.51 (m, 2H), 7.13 (d,  $J = 8.3$  Hz, 1H), 7.10 (s, 1H), 6.60 (m, 1H), 3.45 (m, 1H), 3.38 (m, 1H), 3.15 (m, 1H), 2.94 (ddd,  $J = 18.9, 2.5, 1.4$  Hz, 1H), 2.36 (s, 3H), 1.68 (s, 9H).  $^{13}\text{C}$  NMR (126 MHz,  $\text{CDCl}_3$ )  $\delta$  192.7, 179.5, 149.2, 145.5, 142.2, 142.1, 138.3, 136.0, 134.8, 134.4, 132.2, 129.0, 128.9, 128.3, 122.4, 114.8, 84.3, 52.1, 47.1, 45.4, 28.1, 21.0. HRMS (ESI)  $m/z$  calcd for  $\text{C}_{25}\text{H}_{25}\text{NO}_4$   $[\text{M} + \text{Na}]^+ = 426.1676$ , found:426.1680.

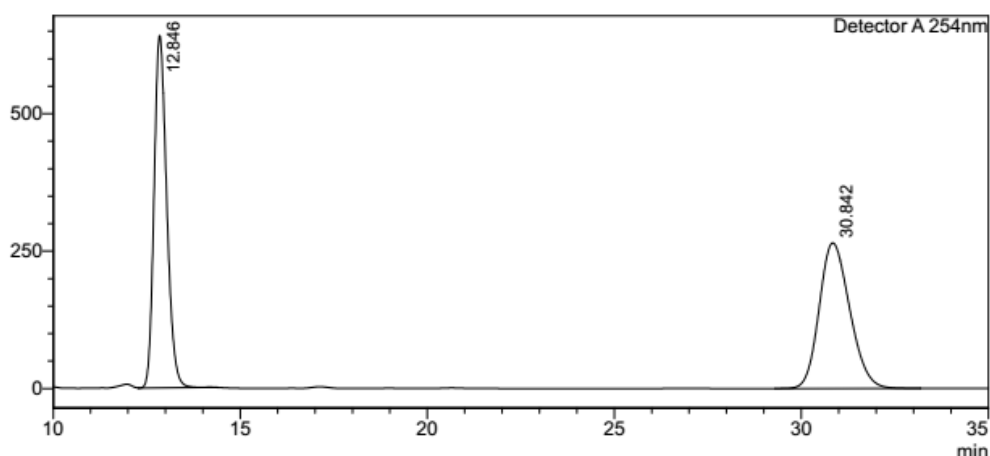

<Peak Table>

| Detector A 254nm |           |          |        |        |      |      |      |
|------------------|-----------|----------|--------|--------|------|------|------|
| Peak#            | Ret. Time | Area     | Height | Conc.  | Unit | Mark | Name |
| 1                | 12.846    | 15083193 | 640633 | 50.064 |      | M    |      |
| 2                | 30.842    | 15044450 | 264817 | 49.936 |      |      |      |
| Total            |           | 30127643 | 905450 |        |      |      |      |

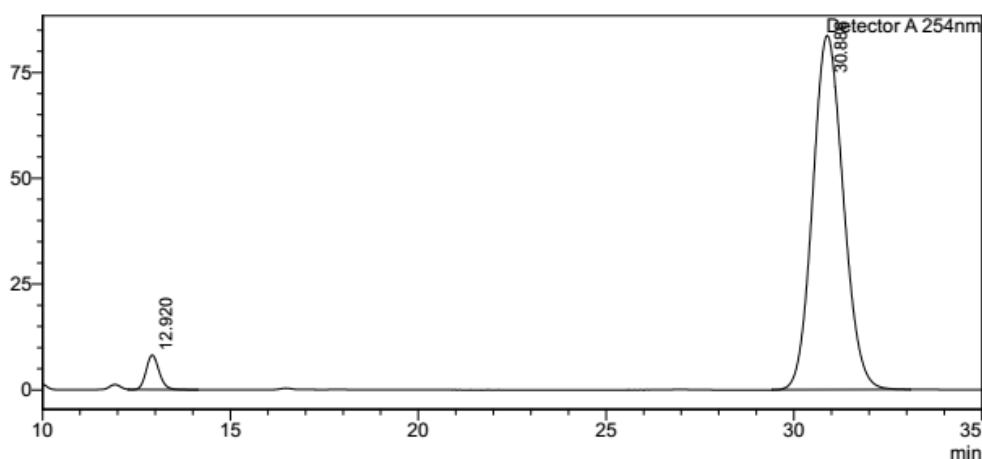

<Peak Table>

| Detector A 254nm |           |         |        |        |      |      |      |
|------------------|-----------|---------|--------|--------|------|------|------|
| Peak#            | Ret. Time | Area    | Height | Conc.  | Unit | Mark | Name |
| 1                | 12.920    | 194425  | 8120   | 3.935  |      | M    |      |
| 2                | 30.886    | 4746039 | 83680  | 96.065 |      |      |      |
| Total            |           | 4940464 | 91800  |        |      |      |      |

*tert*-Butyl (*R*)-3-benzoyl-5'-methoxy-2'-oxospiro[cyclopentane-1,3'-indolin]-3-ene-1'-carboxylate **3f**

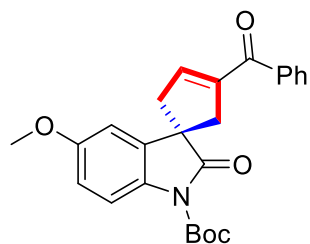

According to general [4 + 1] annulation procedure, **3f** was obtained in 95% yield (40 mg) as a white solid and 91% *ee*.  $[\alpha]_D^{25} = 7.9$  (c 1.0, CHCl<sub>3</sub>). The *ee* was determined by chiral stationary phase HPLC analysis [Daicel Chiralpak IC, isopropanol/hexane = 20/80, 1.0 mL/min,  $\lambda = 254$  nm,  $t_R$  (major) = 43.0 min,  $t_R$  (minor) = 24.9 min]. <sup>1</sup>H NMR (500 MHz, CDCl<sub>3</sub>)  $\delta$  7.85 (d,  $J = 8.0$  Hz, 2H), 7.79 (d,  $J = 8.2$  Hz, 1H), 7.58 (m, 1H), 7.50 (t,  $J = 7.6$  Hz, 2H), 6.86 (s, 1H), 6.84 (d,  $J = 2.3$  Hz, 1H), 6.59 (s, 1H), 3.82 (s, 3H), 3.47 (d,  $J = 16.8$  Hz, 1H), 3.38 (d,  $J = 18.9$  Hz, 1H), 3.15 (d,  $J = 16.8$  Hz, 1H), 2.94 (d,  $J = 18.9$  Hz, 1H), 1.68 (s, 9H). <sup>13</sup>C NMR (126 MHz, CDCl<sub>3</sub>)  $\delta$  192.6, 179.3, 157.3, 149.2, 142.1, 142.0, 138.3, 135.7, 132.3, 131.8, 128.9, 128.4, 116.0, 112.8, 108.3, 84.3, 55.7, 52.4, 47.1, 45.4, 28.1. HRMS (ESI)  $m/z$  calcd for C<sub>25</sub>H<sub>25</sub>NO<sub>5</sub> [M + Na]<sup>+</sup> = 442.1625, found:442.1638.

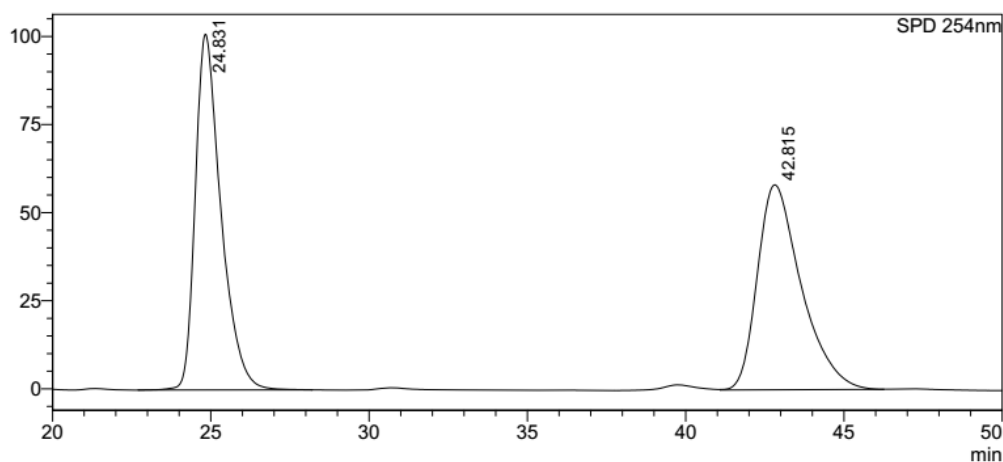

**<Peak Table>**

SPD 254nm

| Peak# | Ret. Time | Area     | Height | Conc.  | Unit | Mark | Name |
|-------|-----------|----------|--------|--------|------|------|------|
| 1     | 24.831    | 5699014  | 100962 | 50.430 |      | S    |      |
| 2     | 42.815    | 5601865  | 58147  | 49.570 |      |      |      |
| Total |           | 11300879 | 159109 |        |      |      |      |

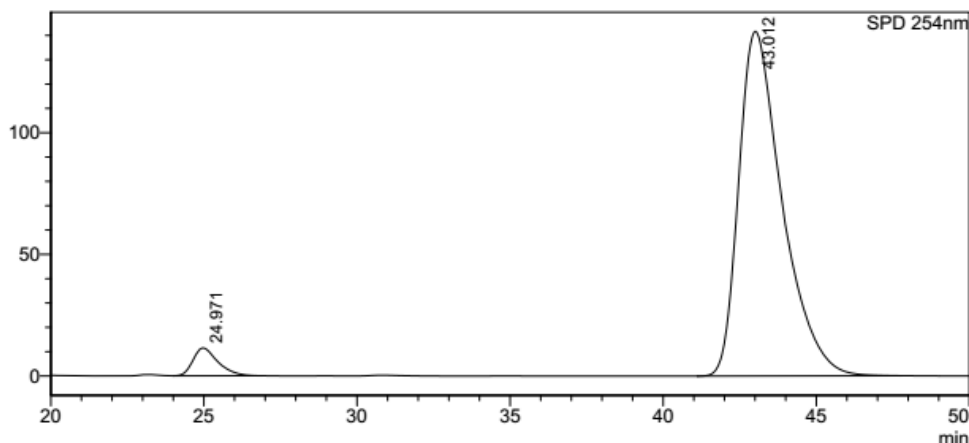

<Peak Table>

| SPD 254nm |           |          |        |        |      |      |      |
|-----------|-----------|----------|--------|--------|------|------|------|
| Peak#     | Ret. Time | Area     | Height | Conc.  | Unit | Mark | Name |
| 1         | 24.971    | 647404   | 11457  | 4.430  |      |      |      |
| 2         | 43.012    | 13967672 | 141665 | 95.570 |      |      |      |
| Total     |           | 14615076 | 153121 |        |      |      |      |

*tert*-Butyl (R)-3-benzoyl-6'-chloro-2'-oxospiro[cyclopentane-1,3'-indolin]-3-ene-1'-carboxylate **3g**

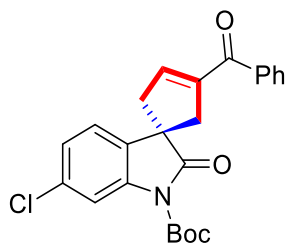

According to general [4 + 1] annulation procedure, **3g** was obtained in 95% yield (40.3 mg) as a white solid and 94% *ee*.  $[\alpha]_D^{25} = 1.6$  (c 1.0, CHCl<sub>3</sub>). The *ee* was determined by chiral stationary phase HPLC analysis [Daicel Chiralpak IC, isopropanol/hexane = 20/80, 1.0 mL/min,  $\lambda = 254$  nm,  $t_R$  (major) = 20.4 min,  $t_R$  (minor) = 16.5 min]. <sup>1</sup>H NMR (500 MHz, CDCl<sub>3</sub>)  $\delta$  7.84 (m, 3H), 7.59 (d, *J* = 7.6 Hz, 1H), 7.51 (t, *J* = 7.7 Hz, 2H), 7.31 (dd, *J* = 8.7, 2.1 Hz, 1H), 7.27 (d, *J* = 2.1 Hz, 1H), 6.59 (s, 1H), 3.47 (dd, *J* = 16.8, 2.1 Hz, 1H), 3.39 (dd, *J* = 18.9, 2.2 Hz, 1H), 3.14 (d, *J* = 16.8 Hz, 1H), 2.94 (d, *J* = 18.8 Hz, 1H), 1.68 (s, 9H). <sup>13</sup>C NMR (126 MHz, CDCl<sub>3</sub>)  $\delta$  192.4, 178.4, 149.0, 141.9, 141.8, 138.1, 137.0, 136.1, 132.4, 130.4, 128.9, 128.5, 128.4, 122.1, 116.4, 84.9, 52.1, 46.9, 45.3, 28.0. HRMS (ESI) *m/z* calcd for C<sub>24</sub>H<sub>22</sub>ClNO<sub>4</sub> [M + Na]<sup>+</sup> = 446.1130, found:446.1142.

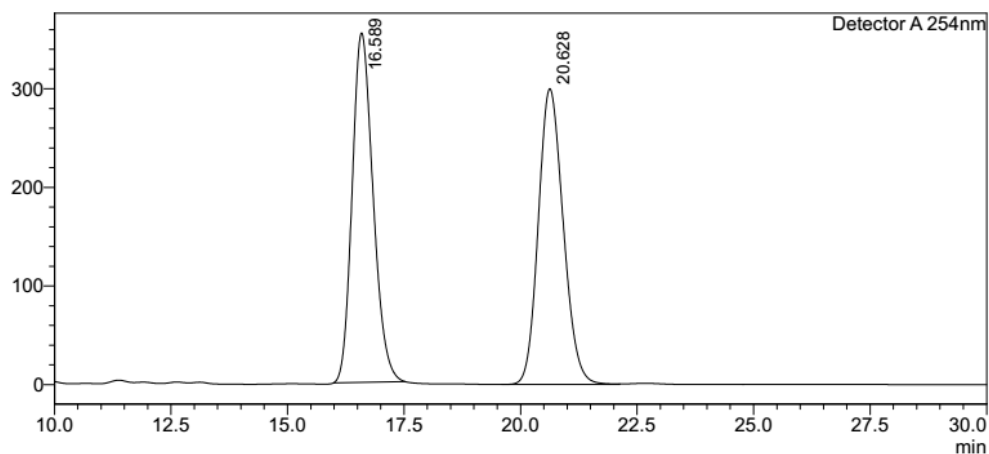

**<Peak Table>**

| Detector A 254nm |           |          |        |        |      |      |      |
|------------------|-----------|----------|--------|--------|------|------|------|
| Peak#            | Ret. Time | Area     | Height | Conc.  | Unit | Mark | Name |
| 1                | 16.589    | 11056170 | 354263 | 49.738 |      | M    |      |
| 2                | 20.628    | 11172492 | 299887 | 50.262 |      |      |      |
| Total            |           | 22228662 | 654151 |        |      |      |      |

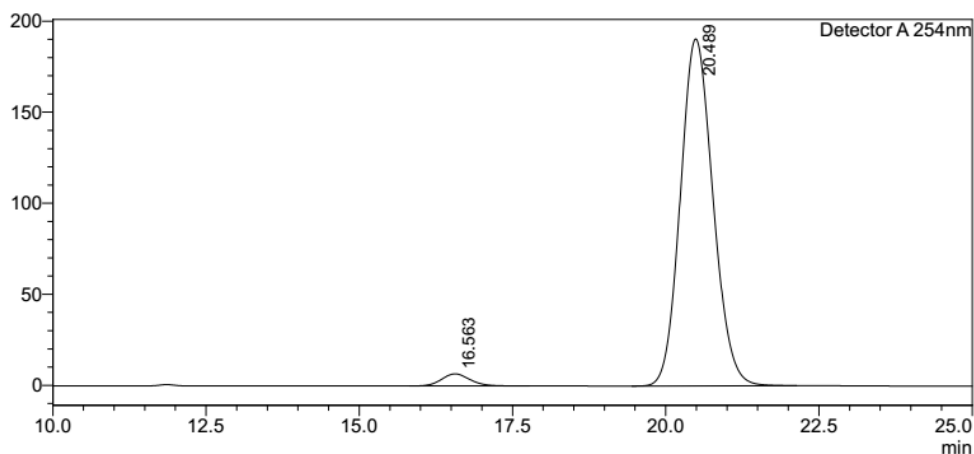

**<Peak Table>**

| Detector A 254nm |           |         |        |        |      |      |      |
|------------------|-----------|---------|--------|--------|------|------|------|
| Peak#            | Ret. Time | Area    | Height | Conc.  | Unit | Mark | Name |
| 1                | 16.563    | 213530  | 6627   | 2.934  |      | S    |      |
| 2                | 20.489    | 7063702 | 190602 | 97.066 |      |      |      |
| Total            |           | 7277232 | 197229 |        |      |      |      |

*tert*-Butyl (R)-3-benzoyl-6'-bromo-2'-oxospiro[cyclopentane-1,3'-indolin]-3-ene-1'-carboxylate **3h**

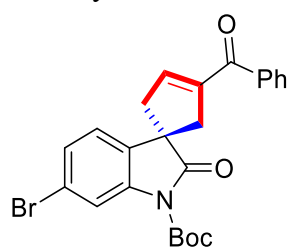

According to general [4 + 1] annulation procedure, **3h** was obtained in 85% yield (39.8 mg) as a white solid and 95% *ee*.  $[\alpha]_D^{25} = 1.6$  (c 1.0, CHCl<sub>3</sub>). The *ee* was determined by

chiral stationary phase HPLC analysis [Daicel Chiralpak IC, isopropanol/hexane = 30/70, 1.0 mL/min,  $\lambda = 254$  nm,  $t_R$  (major) = 23.1 min,  $t_R$  (minor) = 17.8 min].  $^1\text{H}$  NMR (500 MHz,  $\text{CDCl}_3$ )  $\delta$  8.12 (d,  $J = 1.7$  Hz, 1H), 7.84 (m, 2H), 7.59 (d,  $J = 7.5$  Hz, 1H), 7.51 (t,  $J = 7.7$  Hz, 2H), 7.34 (dd,  $J = 8.0, 1.8$  Hz, 1H), 7.17 (d,  $J = 8.0$  Hz, 1H), 6.58 (m, 1H), 3.46 (m, 1H), 3.38 (dd,  $J = 18.9, 2.3$  Hz, 1H), 3.12 (d,  $J = 16.8$  Hz, 1H), 2.92 (d,  $J = 18.8$  Hz, 1H), 1.69 (s, 9H).  $^{13}\text{C}$  NMR (126 MHz,  $\text{CDCl}_3$ )  $\delta$  192.5, 178.5, 148.9, 142.0, 141.7, 139.5, 138.1, 133.3, 132.4, 128.9, 128.4, 128.0, 123.0, 121.9, 118.6, 85.1, 51.9, 46.9, 45.3, 28.0. HRMS (ESI)  $m/z$  calcd for  $\text{C}_{24}\text{H}_{22}\text{BrNO}_4$   $[\text{M} + \text{Na}]^+ = 490.0624$ , found:490.0619.

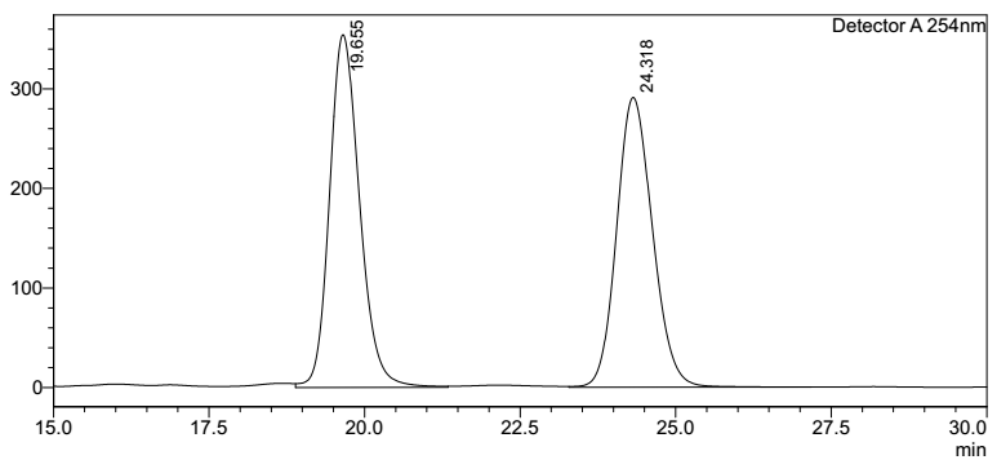

**<Peak Table>**

Detector A 254nm

| Peak# | Ret. Time | Area     | Height | Conc.  | Unit | Mark | Name |
|-------|-----------|----------|--------|--------|------|------|------|
| 1     | 19.655    | 11942682 | 354378 | 50.517 |      |      |      |
| 2     | 24.318    | 11698414 | 291137 | 49.483 |      |      |      |
| Total |           | 23641096 | 645515 |        |      |      |      |



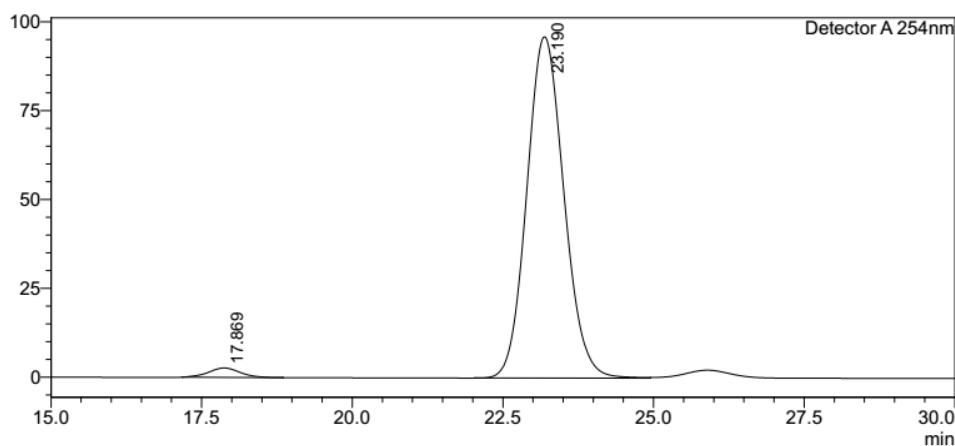

**<Peak Table>**

| Detector A 254nm |           |         |        |        |      |      |      |
|------------------|-----------|---------|--------|--------|------|------|------|
| Peak#            | Ret. Time | Area    | Height | Conc.  | Unit | Mark | Name |
| 1                | 17.869    | 96323   | 2629   | 2.290  |      |      |      |
| 2                | 23.190    | 4110597 | 96022  | 97.710 |      | M    |      |
| Total            |           | 4206921 | 98651  |        |      |      |      |

*tert*-Butyl (R)-3-benzoyl-7'-chloro-2'-oxospiro[cyclopentane-1,3'-indolin]-3-ene-1'-carboxylate **3i**

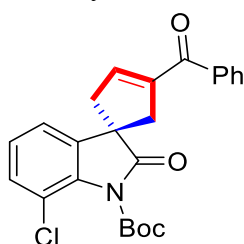

According to general [4 + 1] annulation procedure, **3i** was obtained in 80% yield (34 mg) as a white solid and 81% *ee*.  $[\alpha]_{\text{D}}^{25} = -4.9$  (c 1.0,  $\text{CHCl}_3$ ). The *ee* was determined by chiral stationary phase HPLC analysis [Daicel Chiralpak IC, isopropanol/hexane = 20/80, 1.0 mL/min,  $\lambda = 254$  nm,  $t_{\text{R}}$  (major) = 20.3 min,  $t_{\text{R}}$  (minor) = 14.0 min].  $^1\text{H}$  NMR (500 MHz,  $\text{CDCl}_3$ )  $\delta$  7.85 (d,  $J = 7.4$  Hz, 2H), 7.59 (d,  $J = 7.4$  Hz, 1H), 7.50 (t,  $J = 7.7$  Hz, 2H), 7.32 (d,  $J = 8.1$  Hz, 1H), 7.22 (d,  $J = 7.4$  Hz, 1H), 7.12 (t,  $J = 7.9$  Hz, 1H), 6.59 (s, 1H), 3.47 (dd,  $J = 16.8, 2.1$  Hz, 1H), 3.39 (dd,  $J = 18.9, 2.2$  Hz, 1H), 3.16 (d,  $J = 18.1$  Hz, 1H), 2.96 (d,  $J = 18.9$  Hz, 1H), 1.68 (s, 9H).  $^{13}\text{C}$  NMR (126 MHz,  $\text{CDCl}_3$ )  $\delta$  192.5, 178.9, 148.1, 142.0, 142.0, 141.8, 138.1, 137.6, 137.5, 135.8, 132.4, 130.3, 130.1, 128.9, 128.4, 127.7, 125.6, 120.3, 118.3, 85.7, 52.6, 46.6, 44.9, 27.7. HRMS (ESI)  $m/z$  calcd for  $\text{C}_{24}\text{H}_{22}\text{ClNO}_4$   $[\text{M} + \text{Na}]^+ = 446.1130$ , found:446.1143.

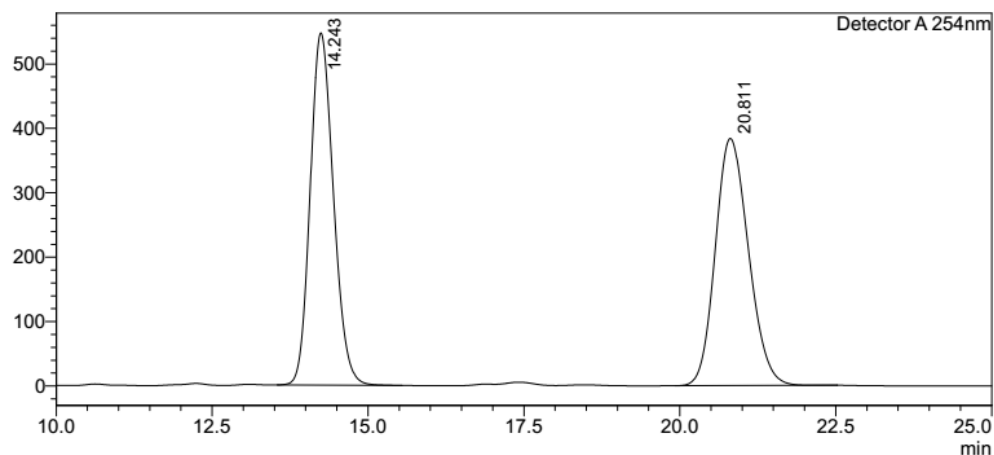

**<Peak Table>**

| Detector A 254nm |           |          |        |        |      |      |      |
|------------------|-----------|----------|--------|--------|------|------|------|
| Peak#            | Ret. Time | Area     | Height | Conc.  | Unit | Mark | Name |
| 1                | 14.243    | 14201946 | 547026 | 49.989 |      | M    |      |
| 2                | 20.811    | 14208352 | 383743 | 50.011 |      | M    |      |
| Total            |           | 28410298 | 930768 |        |      |      |      |

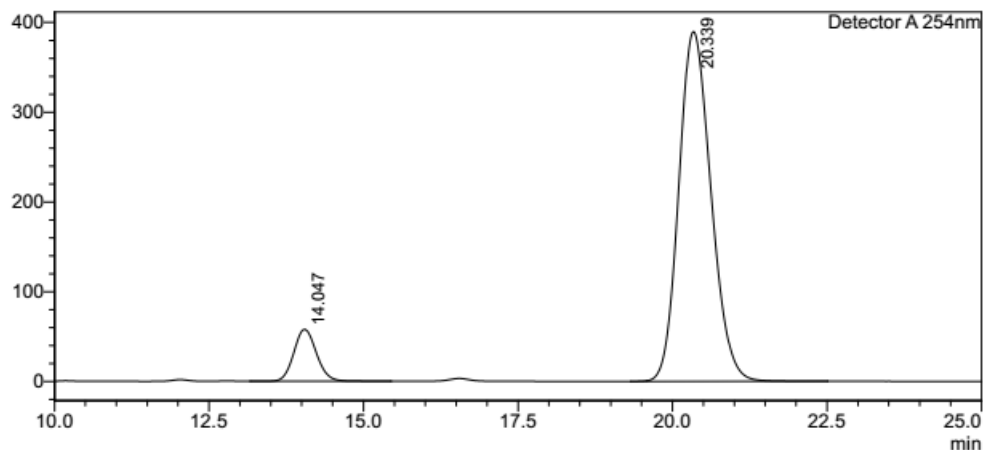

**<Peak Table>**

| Detector A 254nm |           |          |        |        |      |      |      |
|------------------|-----------|----------|--------|--------|------|------|------|
| Peak#            | Ret. Time | Area     | Height | Conc.  | Unit | Mark | Name |
| 1                | 14.047    | 1474551  | 57821  | 9.456  |      |      |      |
| 2                | 20.339    | 14118638 | 389651 | 90.544 |      |      |      |
| Total            |           | 15593188 | 447473 |        |      |      |      |

*tert*-Butyl (R)-3-benzoyl-7'-fluoro-2'-oxospiro[cyclopentane-1,3'-indolin]-3-ene-1'-carboxylate **3j**

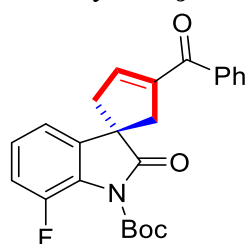

According to general [4 + 1] annulation procedure, **3j** was obtained in 83% yield (33.8 mg) as a white solid and 76% *ee*.  $[\alpha]_D^{25} = 13.6$  (c 1.0, CHCl<sub>3</sub>). The *ee* was determined

by chiral stationary phase HPLC analysis [Daicel Chiralpak IC, isopropanol/hexane = 20/80, 1.0 mL/min,  $\lambda = 254$  nm,  $t_R$  (major) = 31.1 min,  $t_R$  (minor) = 19.3 min].  $^1\text{H}$  NMR (500 MHz,  $\text{CDCl}_3$ )  $\delta$  7.85 (m, 2H), 7.59 (m, 1H), 7.51 (t,  $J = 7.6$  Hz, 2H), 7.16 (m, 1H), 7.11 (m, 2H), 6.59 (s, 1H), 3.49 (dd,  $J = 16.8, 2.1$  Hz, 1H), 3.41 (dd,  $J = 18.9, 2.1$  Hz, 1H), 3.17 (dd,  $J = 16.9, 1.0$  Hz, 1H), 2.96 (d,  $J = 18.9$  Hz, 1H), 1.66 (s, 9H).  $^{13}\text{C}$  NMR (126 MHz,  $\text{CDCl}_3$ )  $\delta$  192.5, 178.4, 147.5, 142.0, 141.7, 138.2, 137.6, 132.4, 128.9, 128.4, 126.1, 126.2, 117.6, 116.8, 116.6, 85.2, 52.6, 46.9, 45.3, 27.7. HRMS (ESI)  $m/z$  calcd for  $\text{C}_{24}\text{H}_{22}\text{FNO}_4$   $[\text{M} + \text{Na}]^+ = 430.1425$ , found:430.1421.

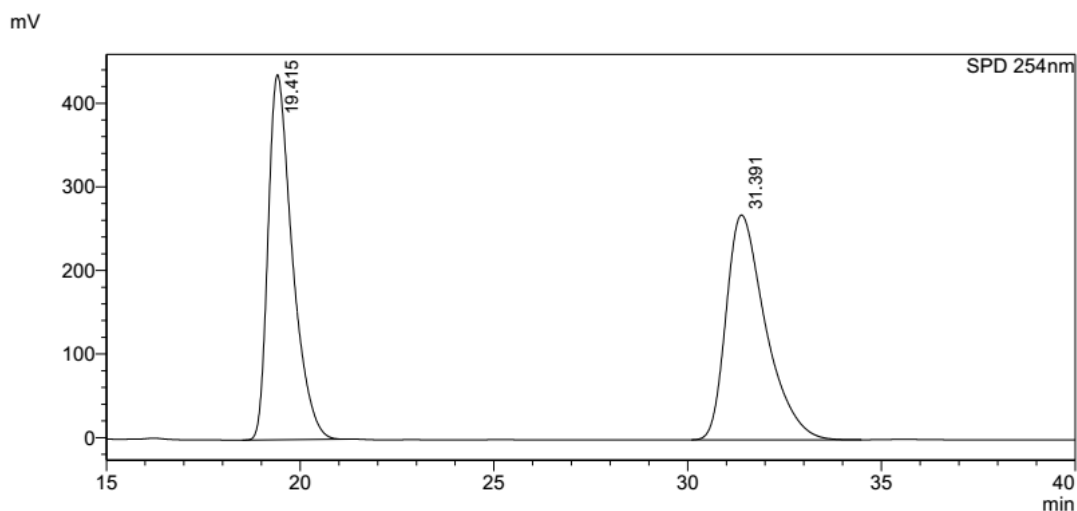

**<Peak Table>**

SPD 254nm

| Peak# | Ret. Time | Area     | Height | Conc.  | Unit | Mark | Name |
|-------|-----------|----------|--------|--------|------|------|------|
| 1     | 19.415    | 18947056 | 436517 | 49.854 |      | M    |      |
| 2     | 31.391    | 19058149 | 268882 | 50.146 |      | M    |      |
| Total |           | 38005205 | 705399 |        |      |      |      |

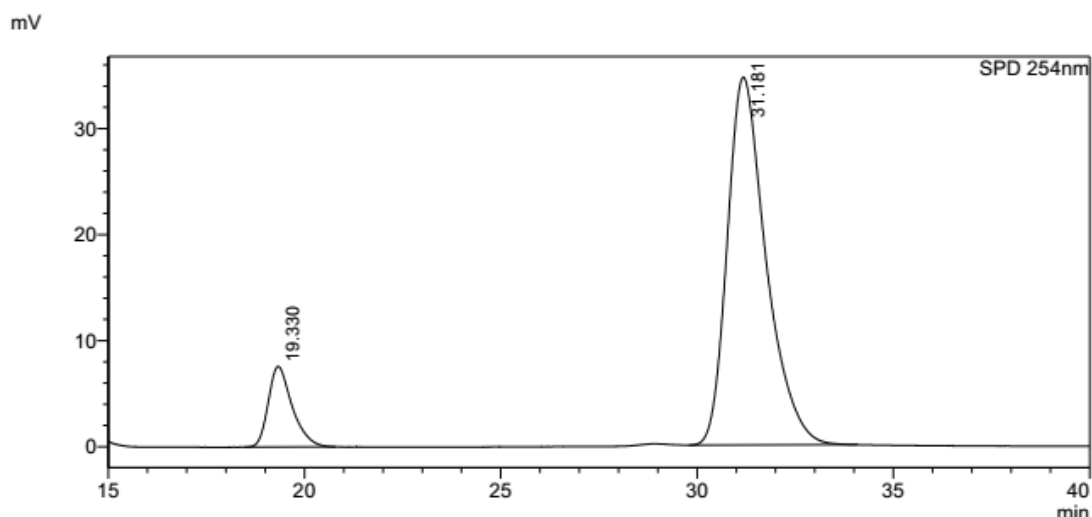

<Peak Table>

| Peak# | Ret. Time | Area    | Height | Conc.  | Unit | Mark | Name |
|-------|-----------|---------|--------|--------|------|------|------|
| 1     | 19.330    | 321973  | 7594   | 11.889 |      |      |      |
| 2     | 31.181    | 2386120 | 34688  | 88.111 |      | S    |      |
| Total |           | 2708092 | 42282  |        |      |      |      |

tert-Butyl (R)-3-(2-methylbenzoyl)-2'-oxospiro[cyclopentane-1,3'-indolin]-3-ene-1'-carboxylate **3k**

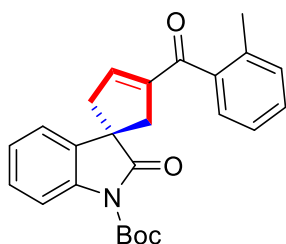

According to general [4 + 1] annulation procedure, **3k** was obtained in 85% yield (34.3 mg) as a white solid and 67% *ee*.  $[\alpha]_D^{25} = 13.6$  (c 1.0, CHCl<sub>3</sub>). The *ee* was determined by chiral stationary phase HPLC analysis [Daicel Chiralpak IC, isopropanol/hexane = 20/80, 1.0 mL/min,  $\lambda = 254$  nm,  $t_R$  (major) = 13.7 min,  $t_R$  (minor) = 9.2 min]. <sup>1</sup>H NMR (500 MHz, CDCl<sub>3</sub>)  $\delta$  7.86 (d,  $J = 8.2$  Hz, 1H), 7.44 (d,  $J = 7.4$  Hz, 1H), 7.35 (m, 3H), 7.27 (t,  $J = 5.7$  Hz, 2H), 7.19 (t,  $J = 7.5$  Hz, 1H), 6.43 (s, 1H), 3.44 (dd,  $J = 16.8, 2.2$  Hz, 1H), 3.33 (dd,  $J = 19.1, 2.3$  Hz, 1H), 3.11 (dd,  $J = 16.8, 1.1$  Hz, 1H), 2.89 (d,  $J = 19.1$  Hz, 1H), 2.42 (s, 3H), 1.69 (s, 9H). <sup>13</sup>C NMR (126 MHz, CDCl<sub>3</sub>)  $\delta$  195.2, 179.2, 149.1, 144.3, 143.9, 138.9, 138.4, 136.2, 134.5, 131.0, 130.1, 128.4, 128.0, 128.0, 125.1, 124.2, 121.7, 115.1, 84.6, 52.3, 46.9, 44.4, 28.1, 19.8. HRMS (ESI)  $m/z$  calcd for C<sub>25</sub>H<sub>25</sub>NO<sub>4</sub> [M + Na]<sup>+</sup> = 426.1676, found:426.1682.

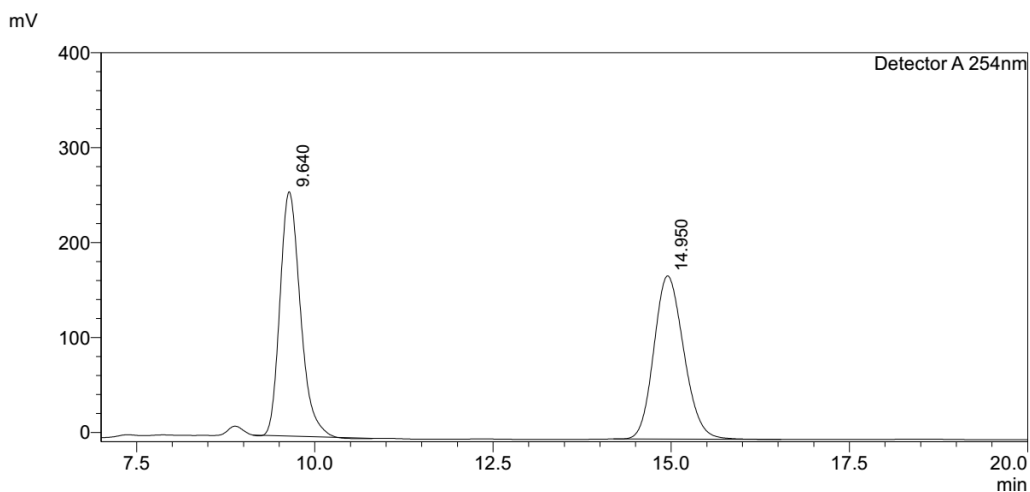

**<Peak Table>**

Detector A 254nm

| Peak# | Ret. Time | Area     | Height | Conc.  | Unit | Mark | Name |
|-------|-----------|----------|--------|--------|------|------|------|
| 1     | 9.640     | 5107919  | 257445 | 50.432 |      | M    |      |
| 2     | 14.950    | 5020385  | 172065 | 49.568 |      | M    |      |
| Total |           | 10128304 | 429511 |        |      |      |      |

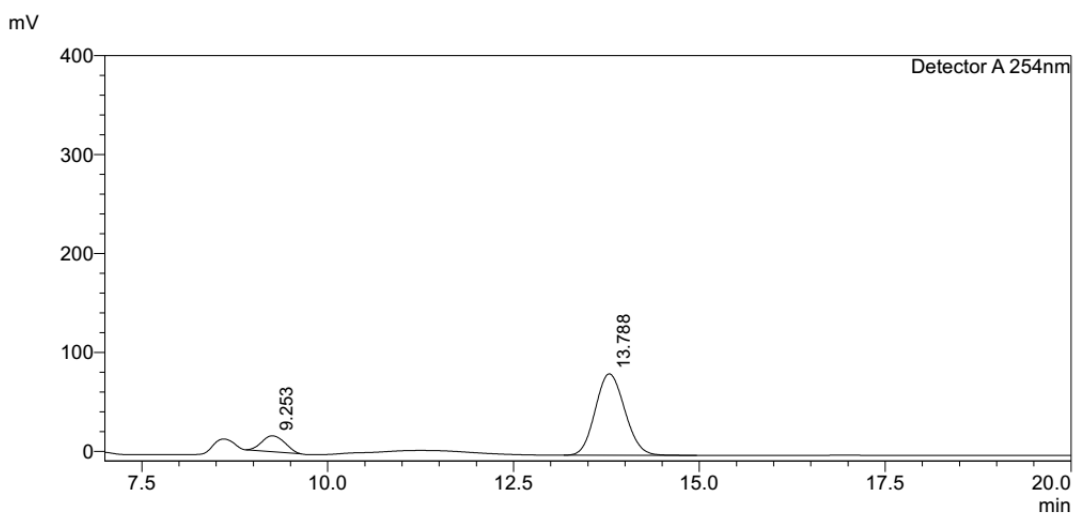

**<Peak Table>**

Detector A 254nm

| Peak# | Ret. Time | Area    | Height | Conc.  | Unit | Mark | Name |
|-------|-----------|---------|--------|--------|------|------|------|
| 1     | 9.253     | 348782  | 16149  | 13.276 |      | M    |      |
| 2     | 13.788    | 2278465 | 82370  | 86.724 |      | M    |      |
| Total |           | 2627247 | 98519  |        |      |      |      |

*tert*-Butyl (R)-3-(3-methylbenzoyl)-2'-oxospiro[cyclopentane-1,3'-indolin]-3-ene-1'-carboxylate **31**

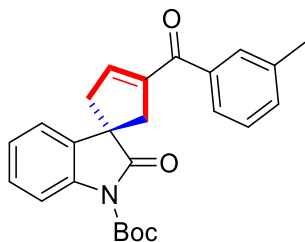

According to general [4 + 1] annulation procedure, **31** was obtained in 95% yield (38.3 mg) as a white solid and 92% *ee*.  $[\alpha]_D^{25} = 13.6$  (c 1.0, CHCl<sub>3</sub>). The *ee* was determined by chiral stationary phase HPLC analysis [Daicel Chiralpak IC, isopropanol/hexane = 30/70, 1.0 mL/min,  $\lambda = 254$  nm,  $t_R$  (major) = 33.0 min,  $t_R$  (minor) = 9.4 min]. <sup>1</sup>H NMR (500 MHz, CDCl<sub>3</sub>)  $\delta$  7.85 (m, 2H), 7.59 (m, 1H), 7.51 (t,  $J = 7.6$  Hz, 2H), 7.16 (m, 1H), 7.11 (m, 2H), 6.59 (s, 1H), 3.49 (dd,  $J = 16.8, 2.1$  Hz, 1H), 3.41 (dd,  $J = 18.9, 2.1$  Hz, 1H), 3.17 (dd,  $J = 16.9, 1.0$  Hz, 1H), 2.96 (d,  $J = 18.9$  Hz, 1H), 1.66 (s, 9H). <sup>13</sup>C NMR (126 MHz, CDCl<sub>3</sub>)  $\delta$  192.8, 179.2, 149.2, 142.2, 141.8, 138.4, 138.2, 134.5, 133.0, 129.3, 128.4, 128.1, 126.2, 125.0, 121.8, 115.0, 84.5, 52.1, 47.0, 45.4, 28.1, 21.3. HRMS (ESI)  $m/z$  calcd for C<sub>25</sub>H<sub>25</sub>NO<sub>4</sub> [M + Na]<sup>+</sup> = 426.1676, found:426.1672.

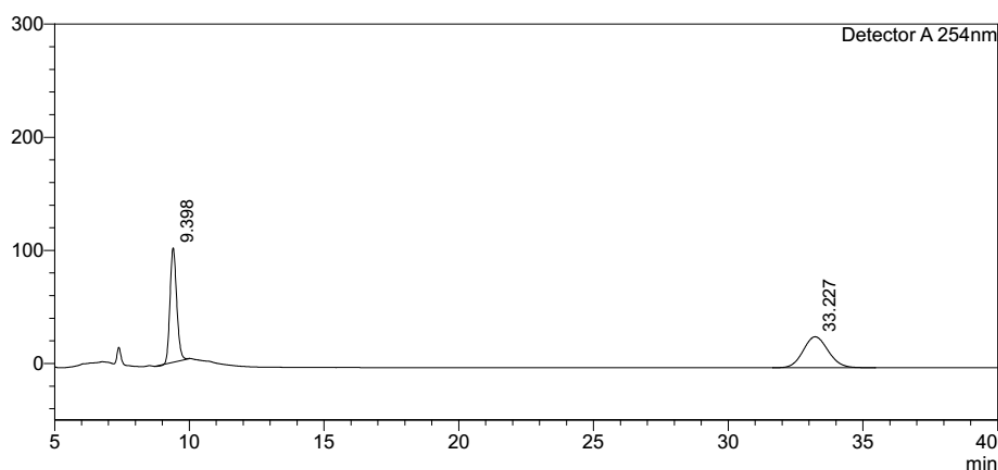

**<Peak Table>**

| Detector A 254nm |           |         |        |        |      |      |      |
|------------------|-----------|---------|--------|--------|------|------|------|
| Peak#            | Ret. Time | Area    | Height | Conc.  | Unit | Mark | Name |
| 1                | 9.398     | 1738212 | 101131 | 49.573 |      | M    |      |
| 2                | 33.227    | 1768154 | 27374  | 50.427 |      |      |      |
| Total            |           | 3506365 | 128504 |        |      |      |      |

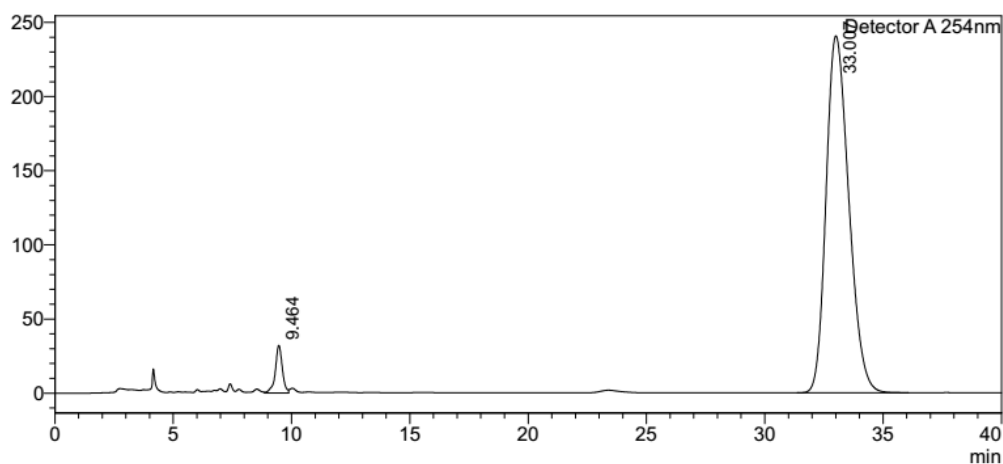

<Peak Table>

| Detector A 254nm |           |          |        |        |      |      |      |
|------------------|-----------|----------|--------|--------|------|------|------|
| Peak#            | Ret. Time | Area     | Height | Conc.  | Unit | Mark | Name |
| 1                | 9.464     | 659442   | 32166  | 3.942  |      |      |      |
| 2                | 33.007    | 16067158 | 240700 | 96.058 |      | S    |      |
| Total            |           | 16726600 | 272866 |        |      |      |      |

*tert*-Butyl (R)-3-(4-methylbenzoyl)-2'-oxospiro[cyclopentane-1,3'-indolin]-3-ene-1'-carboxylate **3m**

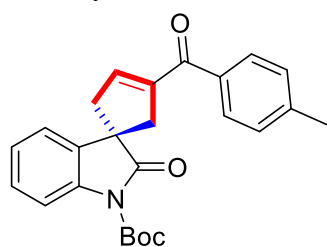

According to general [4 + 1] annulation procedure, **3m** was obtained in 95% yield (38.3 mg) as a white solid and 93% *ee*.  $[\alpha]_D^{25} = -0.8$  (c 1.0,  $\text{CHCl}_3$ ). The *ee* was determined by chiral stationary phase HPLC analysis [Daicel Chiralpak IC, isopropanol/hexane = 30/70, 1.0 mL/min,  $\lambda = 254$  nm,  $t_R$  (major) = 33.9 min,  $t_R$  (minor) = 11.3 min].  $^1\text{H}$ NMR (500 MHz,  $\text{CDCl}_3$ )  $\delta$  7.87 (d,  $J = 8.1$  Hz, 1H), 7.78 (d,  $J = 8.1$  Hz, 2H), 7.32 (m, 4H), 7.20 (m, 1H), 6.57 (m, 1H), 3.46 (m, 1H), 3.38 (dt,  $J = 4.7, 2.3$  Hz, 1H), 3.14 (m, 1H), 2.94 (m, 1H), 2.46 (s, 3H), 1.69 (s, 9H).  $^{13}\text{C}$  NMR (126 MHz,  $\text{CDCl}_3$ )  $\delta$  192.3, 179.3, 149.2, 143.0, 142.1, 141.3, 138.4, 135.6, 134.5, 129.2, 129.0, 128.4, 125.1, 121.8, 115.0, 84.5, 52.1, 47.0, 45.5, 28.1, 21.6. HRMS (ESI)  $m/z$  calcd for  $\text{C}_{25}\text{H}_{25}\text{NO}_4$   $[\text{M} + \text{Na}]^+ = 426.1676$ , found:426.1682.

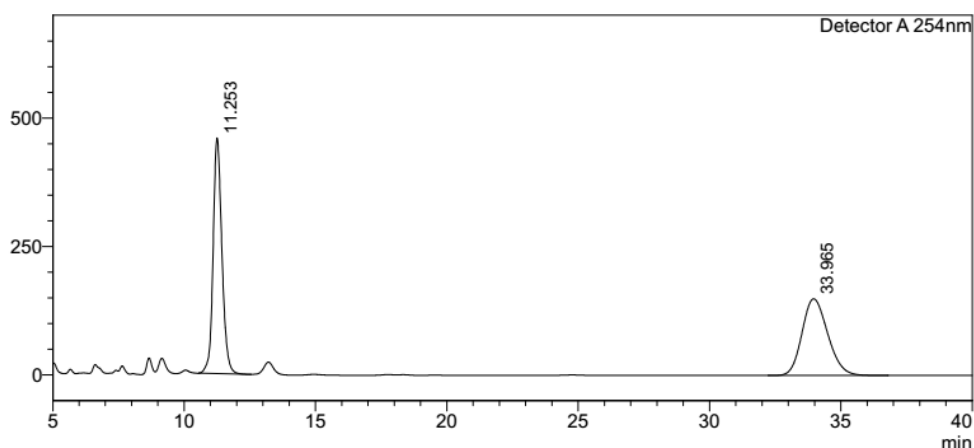

**<Peak Table>**

Detector A 254nm

| Peak# | Ret. Time | Area     | Height | Conc.  | Unit | Mark | Name |
|-------|-----------|----------|--------|--------|------|------|------|
| 1     | 11.253    | 10693222 | 458798 | 51.262 |      | M    |      |
| 2     | 33.965    | 10166892 | 149206 | 48.738 |      |      |      |
| Total |           | 20860114 | 608004 |        |      |      |      |

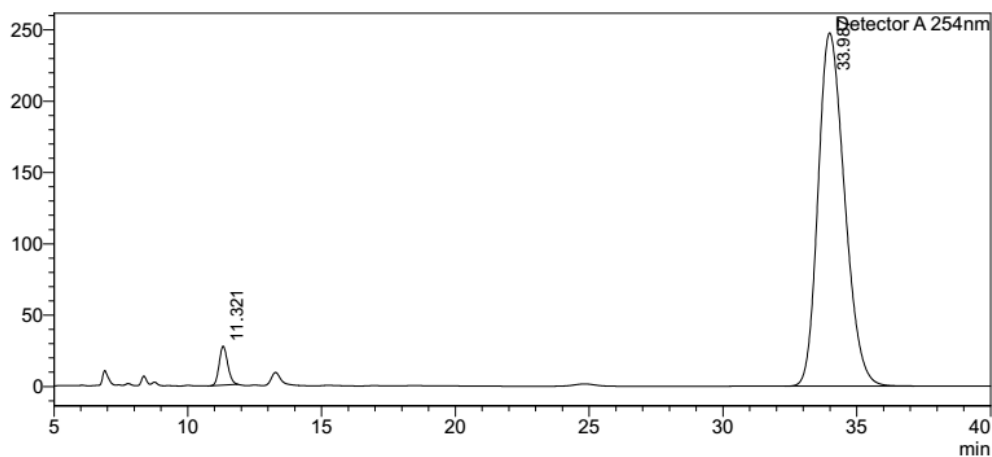

**<Peak Table>**

Detector A 254nm

| Peak# | Ret. Time | Area     | Height | Conc.  | Unit | Mark | Name |
|-------|-----------|----------|--------|--------|------|------|------|
| 1     | 11.321    | 604308   | 27271  | 3.431  |      | M    |      |
| 2     | 33.987    | 17008244 | 247566 | 96.569 |      |      |      |
| Total |           | 17612552 | 274838 |        |      |      |      |

*tert*-Butyl (*R*)-3-(cyclohexanecarbonyl)-2'-oxospiro[cyclopentane-1,3'-indolin]-3-ene-1'-carboxylate **3n**

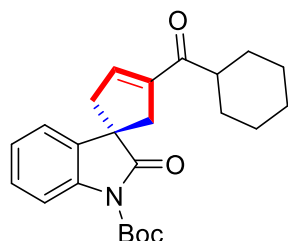

According to general [4 + 1] annulation procedure, **3n** was obtained in 96% yield (38 mg) as a white solid and 94% *ee*.  $[\alpha]_D^{25} = -0.8$  (c 1.0, CHCl<sub>3</sub>). The *ee* was determined by chiral stationary phase HPLC analysis [Daicel Chiralpak IC, isopropanol/hexane =



30/70, 1.0 mL/min,  $\lambda = 254$  nm,  $t_R$  (major) = 13.5 min,  $t_R$  (minor) = 6.9 min].  $^1\text{H}$  NMR (500 MHz,  $\text{CDCl}_3$ )  $\delta$  7.84 (d,  $J = 8.2$  Hz, 1H), 7.31 (m, 1H), 7.21 (m, 1H), 7.15 (m, 1H), 6.77 (d,  $J = 2.2$  Hz, 1H), 3.30 (m, 2H), 2.93 (m, 3H), 1.86 (d,  $J = 12.6$  Hz, 4H), 1.74 (dd,  $J = 22.1, 8.3$  Hz, 1H), 1.67 (s, 9H), 1.46 (m, 2H), 1.33 (m, 4H).  $^{13}\text{C}$  NMR (126 MHz,  $\text{CDCl}_3$ )  $\delta$  201.4, 179.3, 149.2, 142.3, 138.5, 138.3, 134.7, 128.3, 125.0, 121.6, 115.0, 84.5, 52.1, 46.9, 46.7, 44.7, 29.5, 29.3, 28.1, 25.8, 25.7. HRMS (ESI)  $m/z$  calcd for  $\text{C}_{24}\text{H}_{29}\text{NO}_4$   $[\text{M} + \text{Na}]^+ = 418.1989$ , found:418.1993.

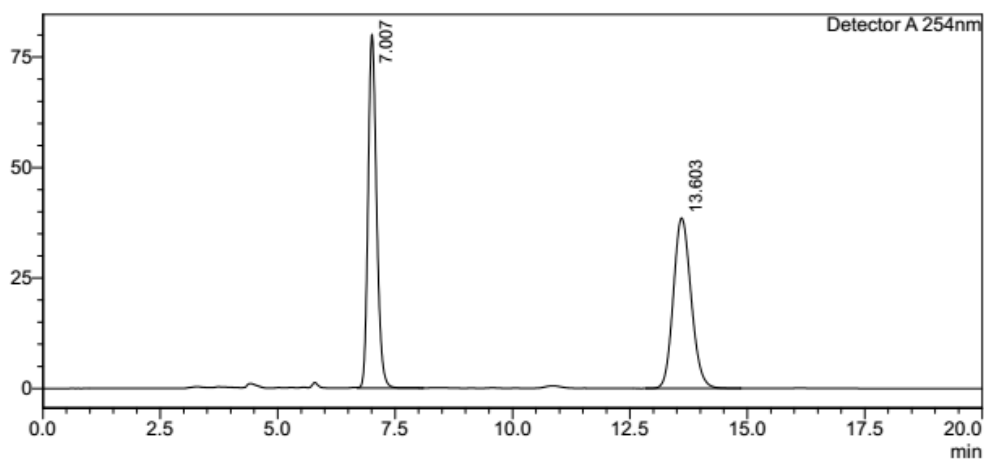

**<Peak Table>**

| Detector A 254nm |           |         |        |        |      |      |      |
|------------------|-----------|---------|--------|--------|------|------|------|
| Peak#            | Ret. Time | Area    | Height | Conc.  | Unit | Mark | Name |
| 1                | 7.007     | 1014090 | 80073  | 49.945 |      | S    |      |
| 2                | 13.603    | 1016320 | 38563  | 50.055 |      |      |      |
| Total            |           | 2030410 | 118636 |        |      |      |      |

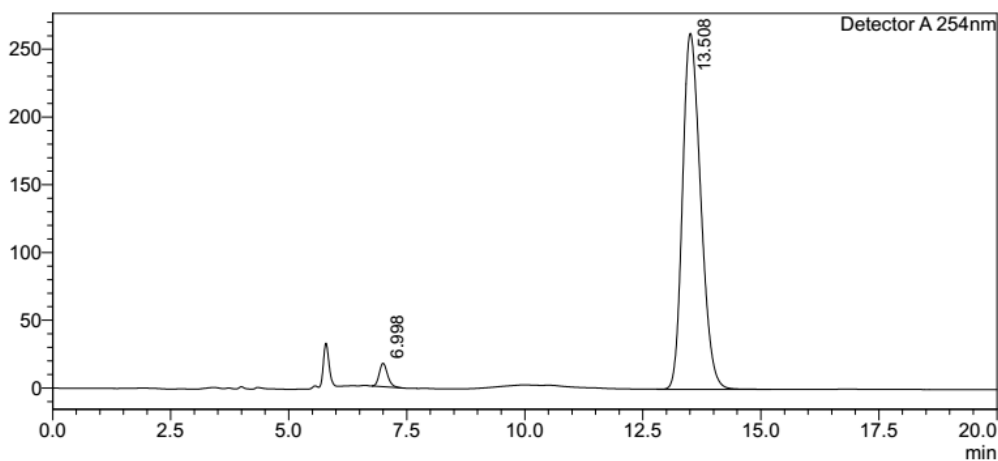

**<Peak Table>**

| Detector A 254nm |           |         |        |        |      |      |      |
|------------------|-----------|---------|--------|--------|------|------|------|
| Peak#            | Ret. Time | Area    | Height | Conc.  | Unit | Mark | Name |
| 1                | 6.998     | 213198  | 17321  | 2.939  |      | M    |      |
| 2                | 13.508    | 7041444 | 262724 | 97.061 |      |      |      |
| Total            |           | 7254642 | 280044 |        |      |      |      |

tert-Butyl (R)-3-(4-fluorobenzoyl)-2'-oxospiro[cyclopentane-1,3'-indolin]-3-ene-1'-carboxylate **3o**

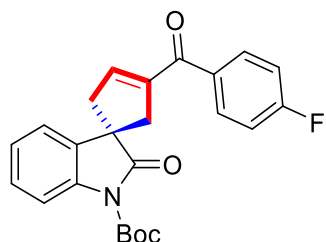

According to general [4 + 1] annulation procedure, **3o** was obtained in 94% yield (38.3 mg) as a white solid and 92% *ee*.  $[\alpha]_D^{25} = -0.8$  (c 1.0,  $\text{CHCl}_3$ ). The *ee* was determined by chiral stationary phase HPLC analysis [Daicel Chiralpak IC, isopropanol/hexane = 30/70, 1.0 mL/min,  $\lambda = 254$  nm,  $t_R$  (major) = 39.1 min,  $t_R$  (minor) = 9.6 min].  $^1\text{H}$  NMR (400 MHz,  $\text{CDCl}_3$ )  $\delta$  7.87 (m, 3H), 7.30 (m, 2H), 7.17 (m, 3H), 6.54 (m, 1H), 3.42 (m, 1H), 3.36 (dd,  $J = 18.8, 2.3$  Hz, 1H), 3.12 (m, 1H), 2.94 (m, 1H), 1.66 (s, 9H).  $^{13}\text{C}$  NMR (101 MHz,  $\text{CDCl}_3$ )  $\delta$  191.1, 179.2, 166.6, 164.0, 149.1, 141.9, 141.8, 138.5, 134.4, 134.5, 134.2, 131.6, 131.5, 128.5, 125.1, 121.8, 115.6, 115.4, 115.1, 84.6, 52.1, 47.0, 45.4, 28.1. HRMS (ESI)  $m/z$  calcd for  $\text{C}_{24}\text{H}_{22}\text{FNO}_4$   $[\text{M} + \text{Na}]^+ = 430.1425$ , found:430.1429.

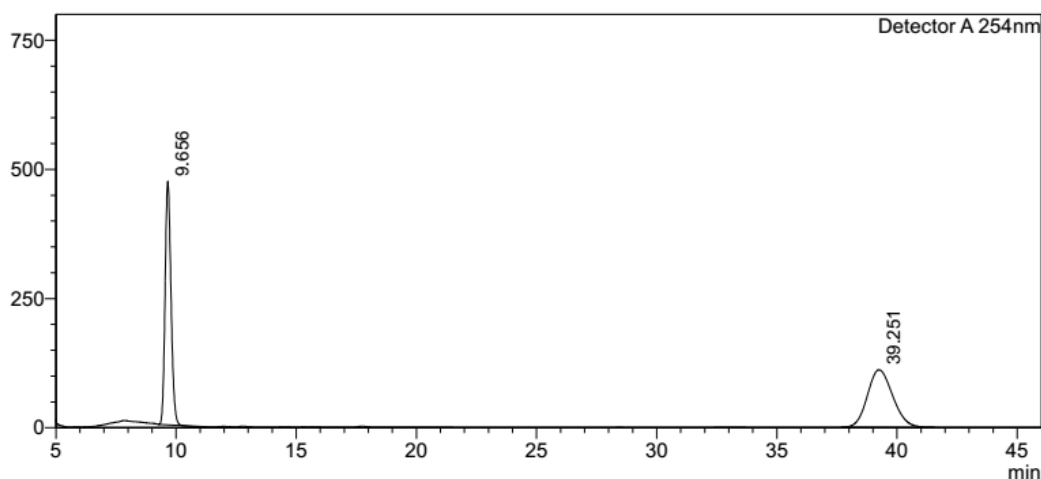

**<Peak Table>**

Detector A 254nm

| Peak# | Ret. Time | Area     | Height | Conc.  | Unit | Mark | Name |
|-------|-----------|----------|--------|--------|------|------|------|
| 1     | 9.656     | 8007526  | 471018 | 49.703 |      | M    |      |
| 2     | 39.251    | 8103186  | 111226 | 50.297 |      | M    |      |
| Total |           | 16110712 | 582244 |        |      |      |      |

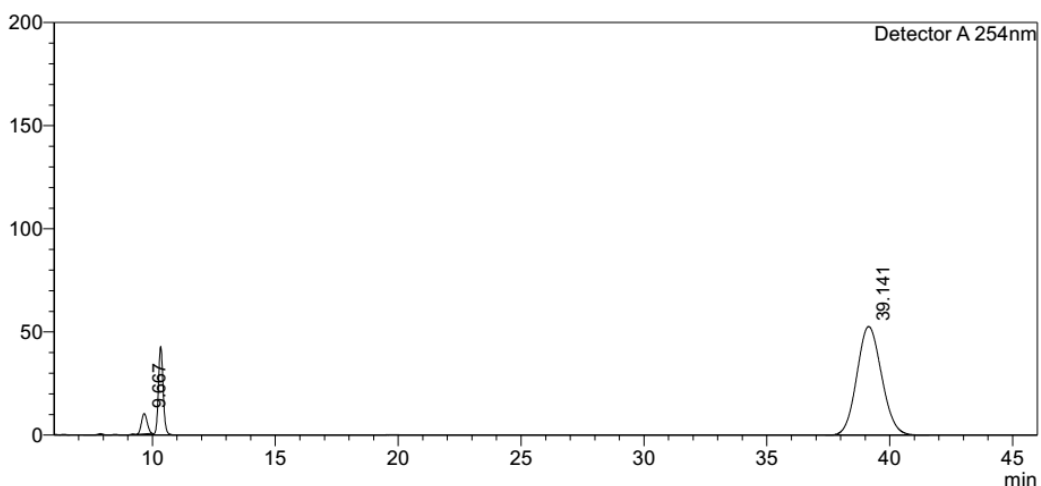

<Peak Table>

| Detector A 254nm |           |         |        |        |      |      |      |
|------------------|-----------|---------|--------|--------|------|------|------|
| Peak#            | Ret. Time | Area    | Height | Conc.  | Unit | Mark | Name |
| 1                | 9.667     | 159385  | 9882   | 4.128  |      | M    |      |
| 2                | 39.141    | 3701814 | 52739  | 95.872 |      |      |      |
| Total            |           | 3861199 | 62621  |        |      |      |      |

tert-Butyl (R)-3-(4-chlorobenzoyl)-2'-oxospiro[cyclopentane-1,3'-indolin]-3-ene-1'-carboxylate **3p**

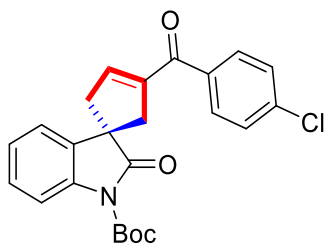

According to general [4 + 1] annulation procedure, **3p** was obtained in 95% yield (40.3 mg) as a white solid and 91% *ee*.  $[\alpha]_D^{25} = -0.8$  (c 1.0,  $\text{CHCl}_3$ ). The *ee* was determined by chiral stationary phase HPLC analysis [Daicel Chiralpak IC, isopropanol/hexane = 30/70, 1.0 mL/min,  $\lambda = 254$  nm,  $t_R$  (major) = 39.3 min,  $t_R$  (minor) = 9.9 min].  $^1\text{H}$  NMR (400 MHz,  $\text{CDCl}_3$ )  $\delta$  7.77 (d,  $J = 8.1$  Hz, 1H), 7.71 (m, 2H), 7.39 (m, 2H), 7.24 (m, 2H), 7.19 (s, 1H), 7.10 (m, 1H), 6.48 (m, 1H), 3.32 (m, 2H), 3.04 (m, 1H), 2.86 (m, 1H), 1.59 (s, 9H).  $^{13}\text{C}$  NMR (101 MHz,  $\text{CDCl}_3$ )  $\delta$  191.3, 179.2, 149.1, 142.2, 141.9, 138.7, 138.5, 136.5, 134.2, 130.4, 128.7, 128.5, 125.1, 121.8, 115.1, 84.6, 52.0, 47.0, 45.3, 29.7, 28.1. HRMS (ESI)  $m/z$  calcd for  $\text{C}_{24}\text{H}_{22}\text{ClNO}_4$   $[\text{M} + \text{Na}]^+ = 446.1130$ , found:446.1131.

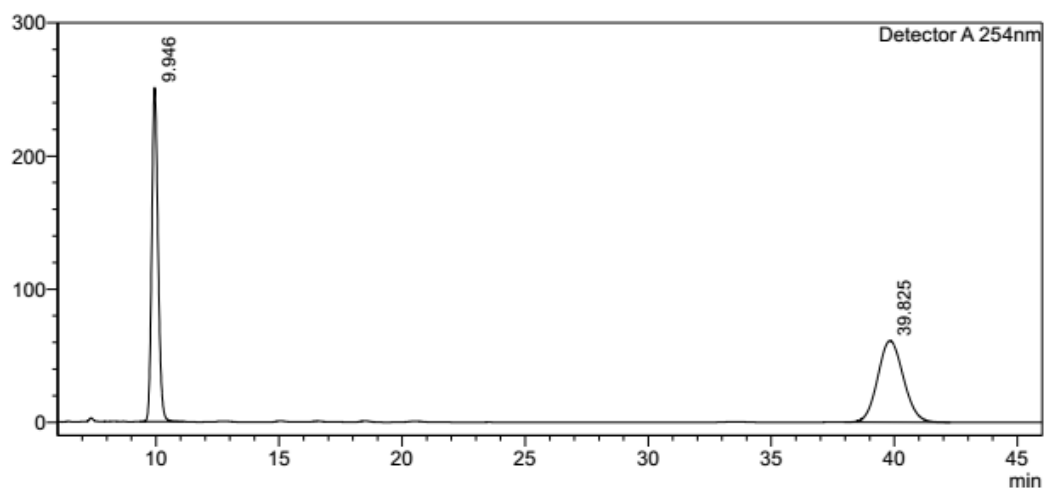

**<Peak Table>**

Detector A 254nm

| Peak# | Ret. Time | Area    | Height | Conc.  | Unit | Mark | Name |
|-------|-----------|---------|--------|--------|------|------|------|
| 1     | 9.946     | 4430214 | 250699 | 49.923 |      | M    |      |
| 2     | 39.825    | 4443849 | 61256  | 50.077 |      |      |      |
| Total |           | 8874063 | 311955 |        |      |      |      |

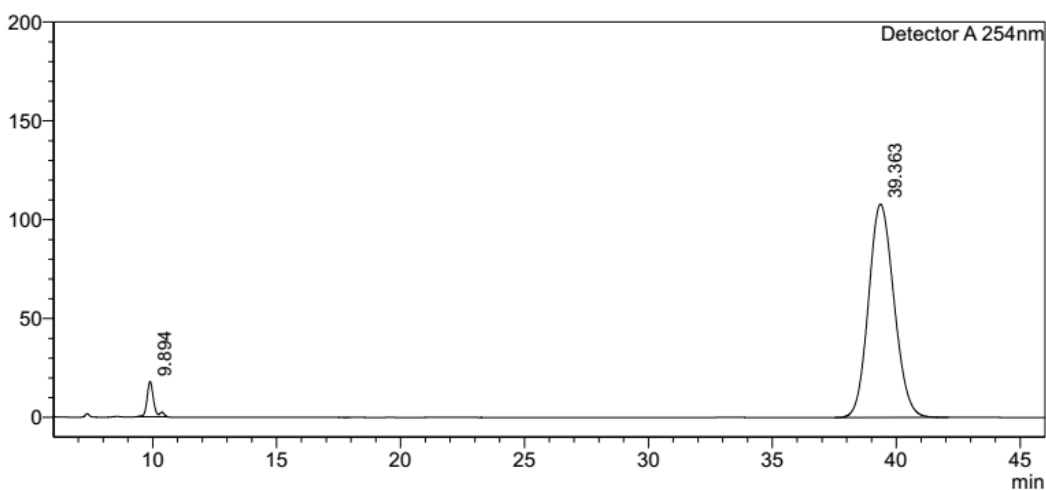

**<Peak Table>**

Detector A 254nm

| Peak# | Ret. Time | Area    | Height | Conc.  | Unit | Mark | Name |
|-------|-----------|---------|--------|--------|------|------|------|
| 1     | 9.894     | 341811  | 17855  | 4.244  |      | M    |      |
| 2     | 39.363    | 7712527 | 107919 | 95.756 |      |      |      |
| Total |           | 8054339 | 125774 |        |      |      |      |

*tert*-Butyl (R)-3-(4-bromobenzoyl)-2'-oxospiro[cyclopentane-1,3'-indolin]-3-ene-1'-carboxylate **3q**

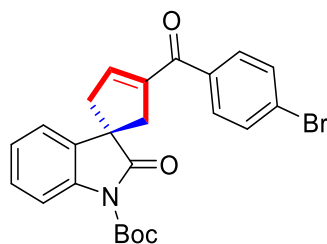

According to general [4 + 1] annulation procedure, **3q** was obtained in 93% yield (43.6 mg) as a white solid and 91% *ee*.  $[\alpha]_D^{25} = -0.8$  (c 1.0, CHCl<sub>3</sub>). The *ee* was determined by chiral stationary phase HPLC analysis [Daicel Chiralpak IC, isopropanol/hexane = 30/70, 1.0 mL/min,  $\lambda = 254$  nm,  $t_R$  (major) = 41.2 min,  $t_R$  (minor) = 10.3 min]. <sup>1</sup>H NMR (400 MHz, CDCl<sub>3</sub>)  $\delta$  7.77 (d, *J* = 8.1 Hz, 1H), 7.64 (m, 2H), 7.55 (m, 2H), 7.24 (m, 2H), 7.19 (s, 1H), 7.10 (m, 1H), 6.48 (m, 1H), 3.32 (m, 2H), 3.04 (m, 1H), 2.86 (m, 1H), 1.59 (s, 9H). <sup>13</sup>C NMR (101 MHz, CDCl<sub>3</sub>)  $\delta$  191.5, 179.2, 149.1, 142.3, 141.9, 138.5, 136.9, 134.2, 131.7, 130.5, 128.5, 127.3, 125.1, 121.8, 115.1, 84.6, 52.0, 47.0, 45.3, 28.1. HRMS (ESI) *m/z* calcd for C<sub>24</sub>H<sub>22</sub>BrO<sub>4</sub> [M + Na]<sup>+</sup> = 490.0624, found:490.0621.

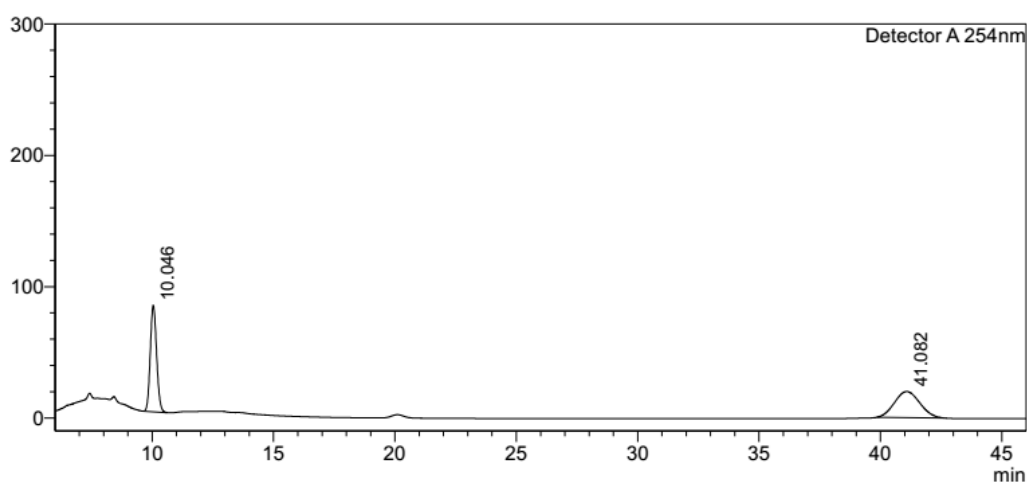

**<Peak Table>**

Detector A 254nm

| Peak# | Ret. Time | Area    | Height | Conc.  | Unit | Mark | Name |
|-------|-----------|---------|--------|--------|------|------|------|
| 1     | 10.046    | 1467745 | 81015  | 50.415 |      | M    |      |
| 2     | 41.082    | 1443587 | 19894  | 49.585 |      | M    |      |
| Total |           | 2911332 | 100909 |        |      |      |      |

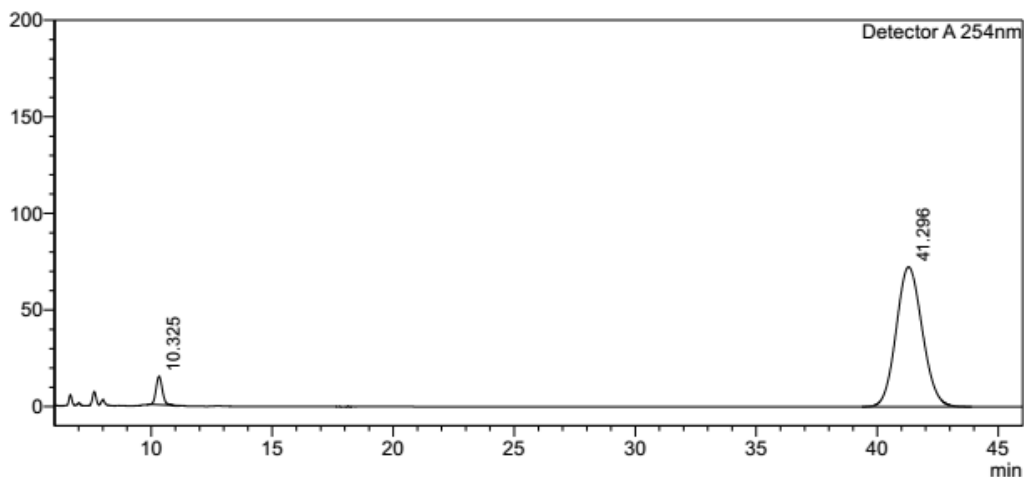

**<Peak Table>**

Detector A 254nm

| Peak# | Ret. Time | Area    | Height | Conc.  | Unit | Mark | Name |
|-------|-----------|---------|--------|--------|------|------|------|
| 1     | 10.325    | 261536  | 14662  | 4.596  |      | M    |      |
| 2     | 41.296    | 5428835 | 72377  | 95.404 |      |      |      |
| Total |           | 5690371 | 87038  |        |      |      |      |

*tert*-Butyl (*R*)-3-(2,3-dioxo-3-phenylpropyl)-2-oxo-3-(2-oxoethyl)indoline-1-carboxylate **4**

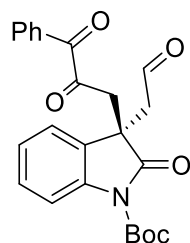

According to the procedure showed above, **4** was obtained in 90% yield. <sup>1</sup>H NMR (500 MHz, CDCl<sub>3</sub>) δ 9.57 (s, 1H), 7.89 (d, *J* = 8.2 Hz, 1H), 7.76 (m, 2H), 7.58 (dd, *J* = 10.6, 4.3 Hz, 1H), 7.40 (m, 2H), 7.29 (m, 2H), 7.11 (m, 1H), 3.94 (d, *J* = 18.1 Hz, 1H), 3.42 (d, *J* = 18.0 Hz, 1H), 3.19 (dd, *J* = 17.6, 1.3 Hz, 1H), 3.03 (d, *J* = 17.7 Hz, 1H), 1.67 (s, 9H). <sup>13</sup>C NMR (126 MHz, CDCl<sub>3</sub>) δ 197.9, 197.2, 189.8, 177.0, 149.0, 140.3, 134.7, 131.3, 130.3, 129.1, 128.7, 128.6, 124.6, 122.9, 115.6, 84.6, 50.5, 46.7, 44.9, 28.1. HRMS (ESI) *m/z* calcd for C<sub>24</sub>H<sub>23</sub>NO<sub>6</sub> [M + Na]<sup>+</sup> = 444.1418, found:444.1451.

*tert*-Butyl (*R*)-3-(2-methoxy-2-oxoethyl)-2-oxo-3-(2-oxoethyl)indoline-1-carboxylate

**5**

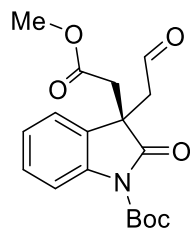

According to the procedure showed above, **5** was obtained in 87% yield.  $^1\text{H}$  NMR (400 MHz,  $\text{CDCl}_3$ )  $\delta$  9.44 (d,  $J = 1.1$  Hz, 1H), 7.81 (d,  $J = 8.2$  Hz, 1H), 7.24 (m, 1H), 7.17 (m, 1H), 7.04 (td,  $J = 7.5, 1.0$  Hz, 1H), 3.43 (s, 3H), 3.14 (dd,  $J = 17.8, 1.4$  Hz, 1H), 2.95 (m, 1H), 2.88 (m, 2H), 1.58 (s, 9H).  $^{13}\text{C}$  NMR (101 MHz,  $\text{CDCl}_3$ )  $\delta$  197.4, 176.9, 169.4, 149.1, 140.2, 128.9, 128.7, 124.4, 122.8, 115.4, 84.4, 51.8, 50.2, 46.8, 41.3, 28.1. HRMS (ESI)  $m/z$  calcd for  $\text{C}_{18}\text{H}_{21}\text{NO}_6$   $[\text{M} + \text{Na}]^+ = 370.1216$ , found:370.1220.

Methyl (*R*)-2-(3-(3-methylbut-2-en-1-yl)-2-oxoindolin-3-yl)acetate **6**

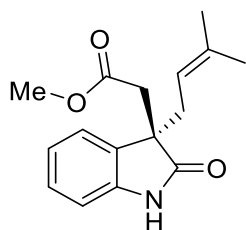

According to the procedure showed above, **6** was obtained in 70% yield.  $^1\text{H}$  NMR (400 MHz,  $\text{CDCl}_3$ )  $\delta$  8.76 (s, 1H), 7.10 (ddd,  $J = 12.3, 9.4, 4.3$  Hz, 2H), 6.90 (td,  $J = 7.5, 0.9$  Hz, 1H), 6.82 (d,  $J = 7.7$  Hz, 1H), 4.87 (m, 1H), 3.37 (s, 3H), 2.97 (d,  $J = 16.3$  Hz, 1H), 2.85 (d,  $J = 16.3$  Hz, 1H), 2.39 (ddd,  $J = 33.8, 14.0, 7.6$  Hz, 2H), 1.53 (s, 3H), 1.42 (s, 3H).  $^{13}\text{C}$  NMR (101 MHz,  $\text{CDCl}_3$ )  $\delta$  181.7, 170.5, 141.3, 136.3, 131.5, 128.0, 123.1, 121.9, 116.9, 109.8, 51.5, 50.3, 39.7, 36.3, 29.6, 25.8, 17.9. HRMS (ESI)  $m/z$  calcd for  $\text{C}_{16}\text{H}_{19}\text{NO}_3$   $[\text{M} + \text{Na}]^+ = 296.1257$ , found:296.1260.

(*R*)-*N*-Methyl-2-(3-(3-methylbut-2-en-1-yl)-2-oxoindolin-3-yl)acetamide **7**

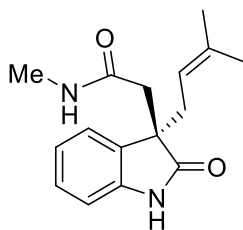

According to the procedure showed above, **7** was obtained in 95% yield.  $^1\text{H}$  NMR (400 MHz,  $\text{CDCl}_3$ )  $\delta$  8.63 (s, 1H), 7.10 (ddd,  $J = 8.9, 6.0, 2.2$  Hz, 2H), 6.92 (td,  $J = 7.6, 1.0$  Hz, 1H), 6.79 (d,  $J = 7.7$  Hz, 1H), 6.20 (d,  $J = 4.3$  Hz, 1H), 4.82 (m, 1H), 2.79 (d,  $J = 14.9$  Hz, 1H), 2.66 (d,  $J = 14.9$  Hz, 1H), 2.56 (d,  $J = 4.8$  Hz, 3H), 2.45 (m, 2H), 1.51 (s, 3H), 1.41 (d,  $J = 0.5$  Hz, 3H).  $^{13}\text{C}$  NMR (101 MHz,  $\text{CDCl}_3$ )  $\delta$  182.1, 169.9, 140.9, 136.0, 132.0, 127.9, 123.4, 122.2, 117.0, 109.9, 51.0, 42.2, 36.0, 26.2, 25.8, 17.9. HRMS (ESI)  $m/z$  calcd for  $\text{C}_{16}\text{H}_{20}\text{N}_2\text{O}_2$   $[\text{M} + \text{Na}]^+ = 295.1417$ , found:295.1421.

(R)-2-(1,3-Bis(3-methylbut-2-en-1-yl)-2-oxoindolin-3-yl)-N-methylacetamide **8**

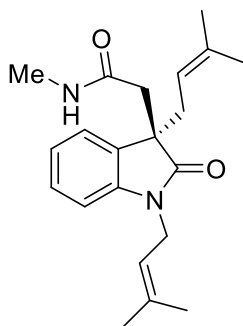

According to the procedure showed above, **8** was obtained in 88% yield.  $[\alpha]_{\text{D}}^{25} = 32$  (c 0.25,  $\text{CHCl}_3$ ).  $^1\text{H}$  NMR (400 MHz,  $\text{CDCl}_3$ )  $\delta$  7.21 (m, 2H), 7.01 (td,  $J = 7.7, 1.0$  Hz, 1H), 6.76 (d,  $J = 7.7$  Hz, 1H), 6.46 (d,  $J = 3.9$  Hz, 1H), 5.06 (m, 1H), 4.74 (m, 1H), 4.39 (dd,  $J = 15.5, 6.4$  Hz, 1H), 4.20 (dd,  $J = 15.5, 6.7$  Hz, 1H), 2.93 (s, 1H), 2.86 (d,  $J = 0.4$  Hz, 1H), 2.73 (dd,  $J = 43.4, 14.7$  Hz, 2H), 2.62 (d,  $J = 4.8$  Hz, 3H), 2.50 (d,  $J = 7.6$  Hz, 2H), 1.80 (s, 3H), 1.69 (d,  $J = 1.1$  Hz, 3H), 1.52 (d,  $J = 0.7$  Hz, 3H), 1.43 (d,  $J = 0.7$  Hz, 3H). HRMS (ESI)  $m/z$  calcd for  $\text{C}_{21}\text{H}_{28}\text{N}_2\text{O}_2$   $[\text{M} + \text{Na}]^+ = 363.2043$ , found:363.2050. HNMR is identical to the literature report.<sup>4</sup>



(3*R*,8*aS*)-1-Methyl-3*a*,8-bis(3-methylbut-2-en-1-yl)-3,3*a*,8,8*a*-tetrahydropyrrolo[2,3-  
b]indol-2(1H)-one 9

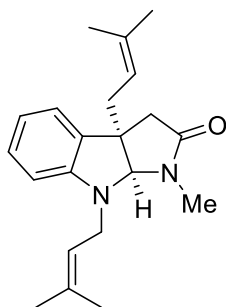

According to the procedure showed above, the cyclization product was obtained in 94% yield.  $^1\text{H NMR}$  (500 MHz,  $\text{CD}_3\text{OD}$ )  $\delta$  7.10 (m, 2H), 6.76 (td,  $J = 7.4, 0.9$  Hz, 1H), 6.60 (d,  $J = 7.9$  Hz, 1H), 5.29 (m, 1H), 5.03 (m, 1H), 4.02 (ddd,  $J = 55.6, 15.7, 6.8$  Hz, 2H), 2.88 (s, 3H), 2.69 (dt,  $J = 40.6, 9.0$  Hz, 2H), 2.47 (dd,  $J = 14.4, 8.4$  Hz, 1H), 2.39 (dd,  $J = 14.4, 6.6$  Hz, 1H), 1.77 (m, 6H), 1.71 (s, 3H), 1.57 (s, 3H). HRMS (ESI)  $m/z$  calcd for  $\text{C}_{21}\text{H}_{28}\text{N}_2\text{O}$   $[\text{M} + \text{Na}]^+ = 347.2094$ , found:347.2097. HNMR is identical to the literature report.<sup>4</sup>

(+)-Debromoflustramine B

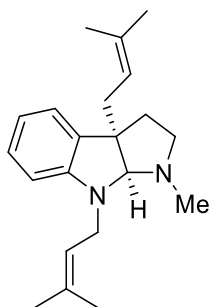

According to the procedure showed above, the reduction product was obtained in 91% yield.  $[\alpha]_D^{25} = 56$  (c 0.25,  $\text{CHCl}_3$ ).  $^1\text{H NMR}$  (400 MHz,  $\text{CDCl}_3$ )  $\delta$  6.97 (m, 1H), 6.90 (dd,  $J = 7.3, 1.0$  Hz, 1H), 6.58 (td,  $J = 7.4, 1.0$  Hz, 1H), 6.34 (d,  $J = 7.8$  Hz, 1H), 5.10 (tdd,  $J = 5.7, 2.8, 1.4$  Hz, 1H), 4.90 (m, 1H), 4.19 (s, 1H), 3.85 (dd,  $J = 16.1, 5.7$  Hz, 1H), 3.73 (dd,  $J = 16.1, 7.2$  Hz, 1H), 2.60 (ddd,  $J = 10.0, 6.7, 3.4$  Hz, 1H), 2.49 (td,  $J = 9.2, 5.8$  Hz, 1H), 2.41 (s, 3H), 2.35 (d,  $J = 7.1$  Hz, 2H), 1.99 (m, 1H), 1.85 (m, 1H), 1.63

(m, 6H), 1.58 (d,  $J = 1.0$  Hz, 3H), 1.51 (s, 3H).  $^{13}\text{C}$  NMR (101 MHz,  $\text{CDCl}_3$ )  $\delta$  151.8, 135.6, 134.3, 133.7, 127.6, 122.9, 121.5, 120.7, 117.6, 107.5, 91.3, 57.1, 52.8, 46.9, 39.0, 38.4, 37.8, 26.0, 25.8, 18.2, 18.1. HRMS (ESI)  $m/z$  calcd for  $\text{C}_{21}\text{H}_{30}\text{N}_2$   $[\text{M} + \text{Na}]^+$  = 333.2301, found:333.2308. HNMR is identical to the literature report.<sup>4</sup>

## E. $^1\text{H}$ and $^{13}\text{C}$ NMR spectra

$^1\text{H}$  NMR of **3a** (500 MHz,  $\text{CDCl}_3$ )

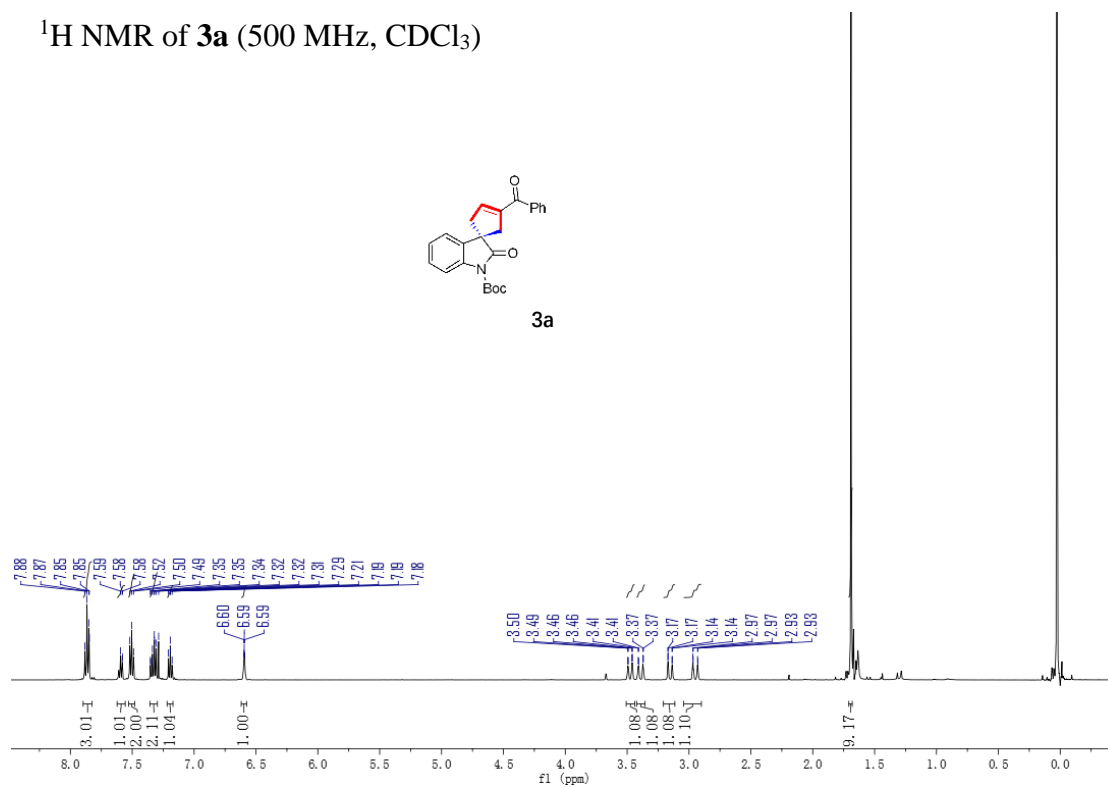

$^{13}\text{C}$  NMR of **3a** (126 MHz,  $\text{CDCl}_3$ )

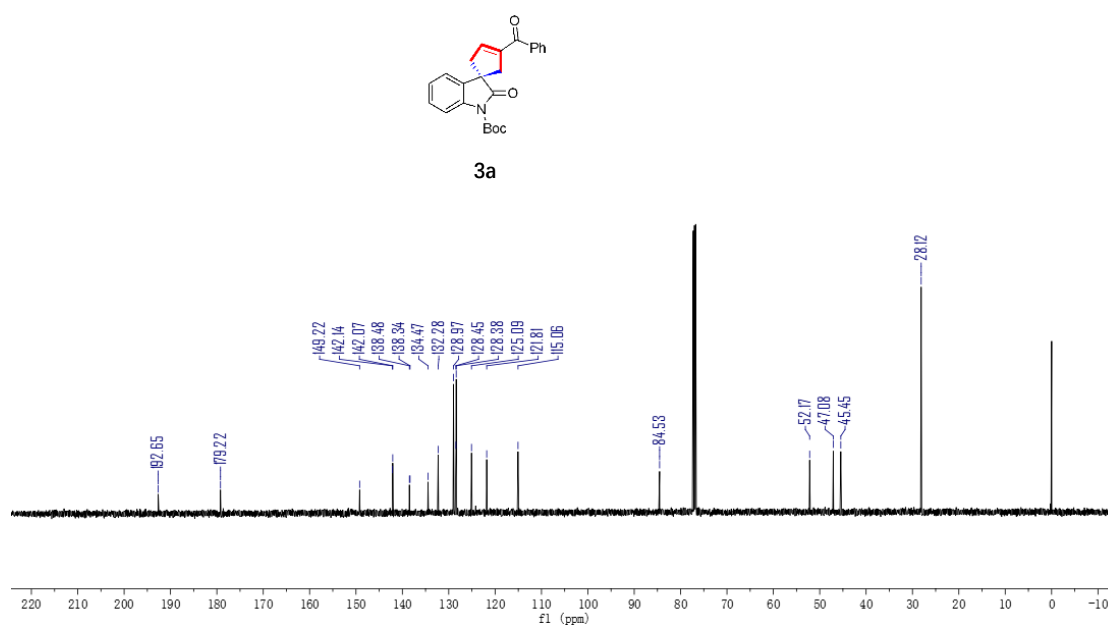

$^1\text{H}$  NMR of **3b** (500 MHz,  $\text{CDCl}_3$ )

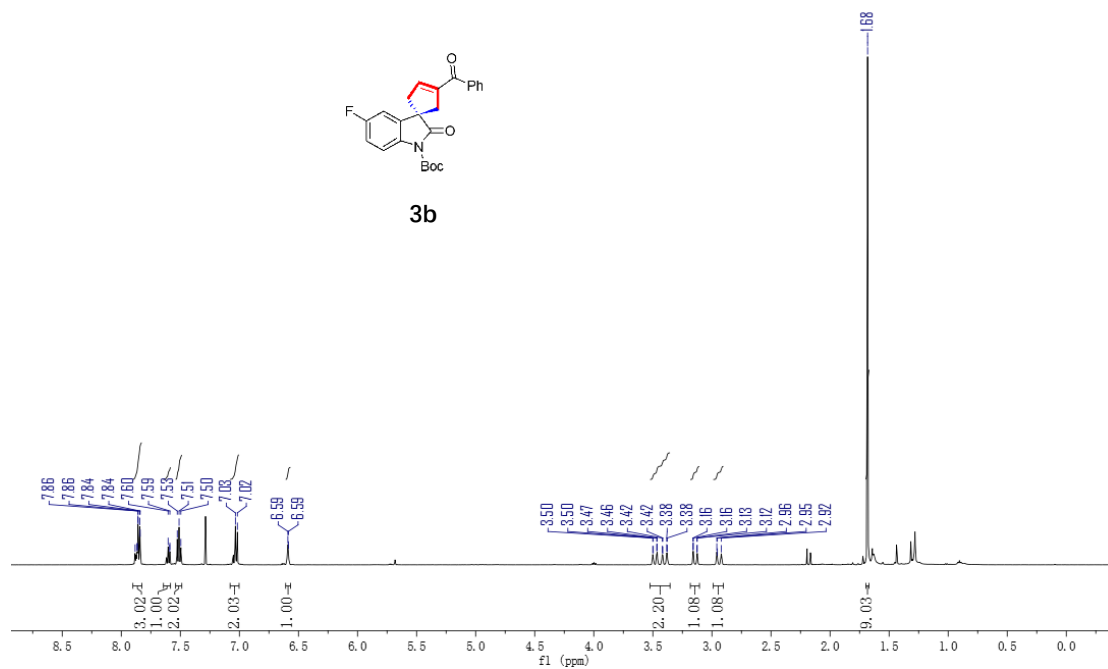

$^{13}\text{C}$  NMR of **3b** (126 MHz,  $\text{CDCl}_3$ )

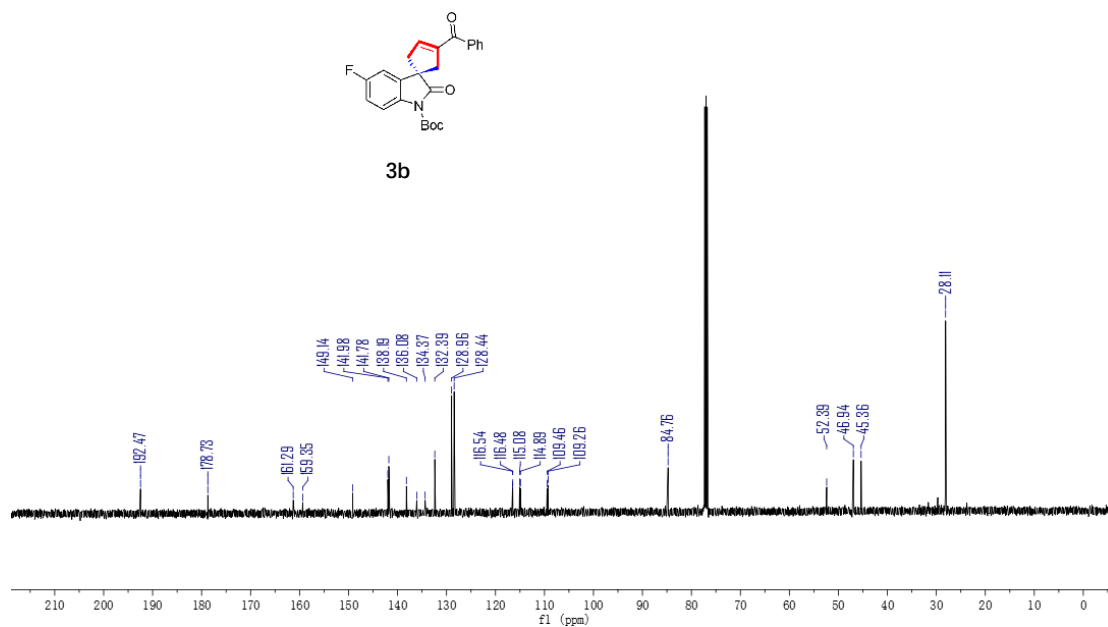



$^1\text{H}$  NMR of **3d** (500 MHz,  $\text{CDCl}_3$ )

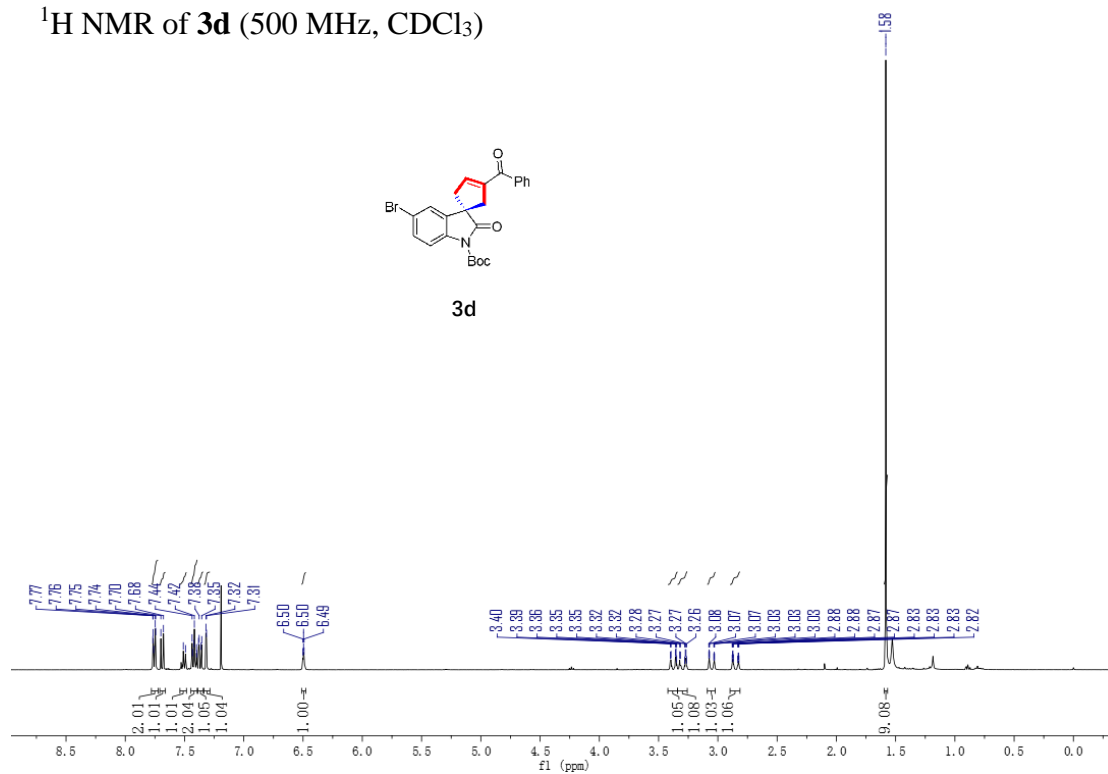

$^{13}\text{C}$  NMR of **3d** (126 MHz,  $\text{CDCl}_3$ )

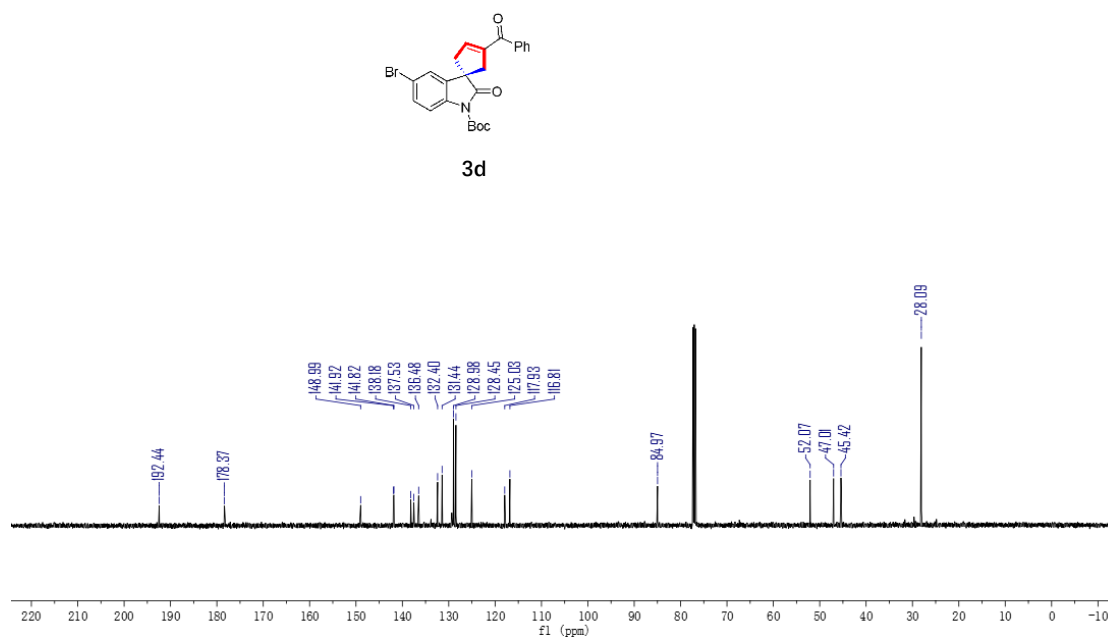

$^1\text{H}$  NMR of **3e** (500 MHz,  $\text{CDCl}_3$ )

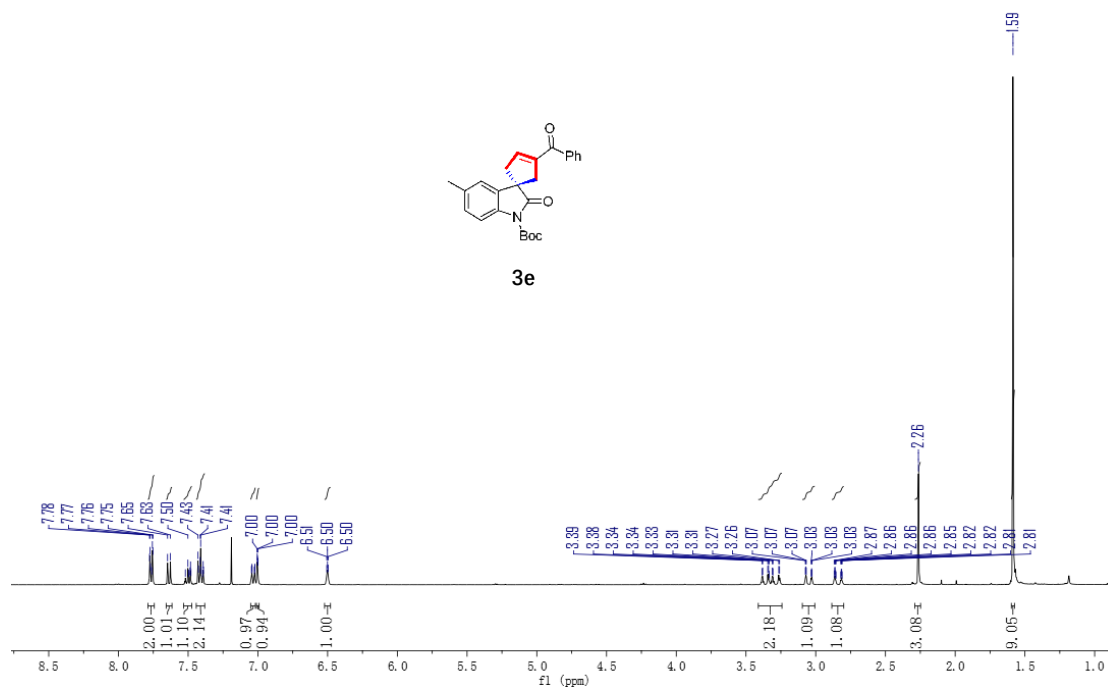

$^{13}\text{C}$  NMR of **3e** (126 MHz,  $\text{CDCl}_3$ )

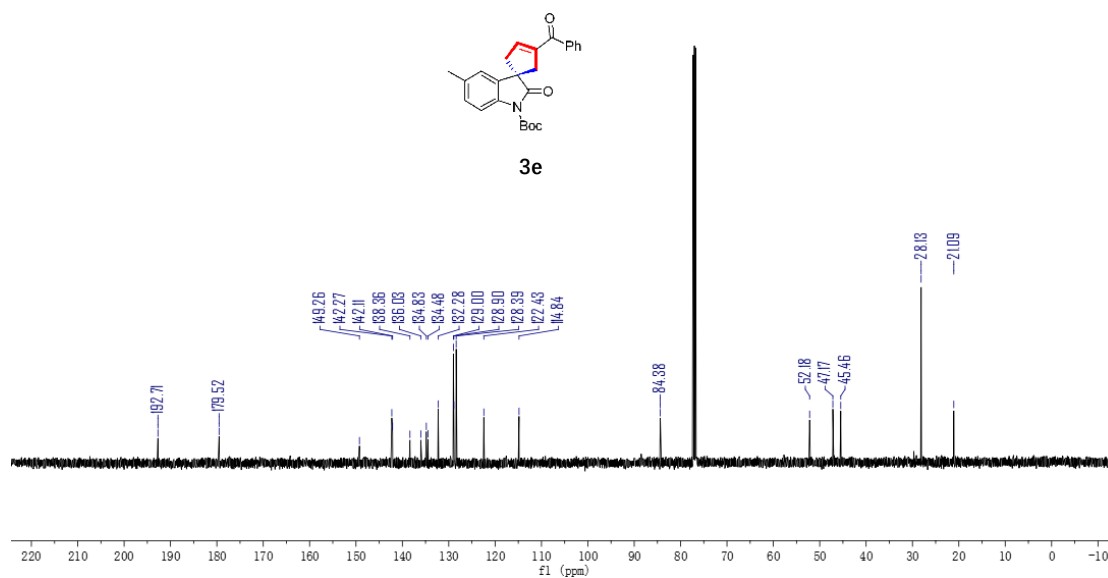

$^1\text{H}$  NMR of **3f** (500 MHz,  $\text{CDCl}_3$ )

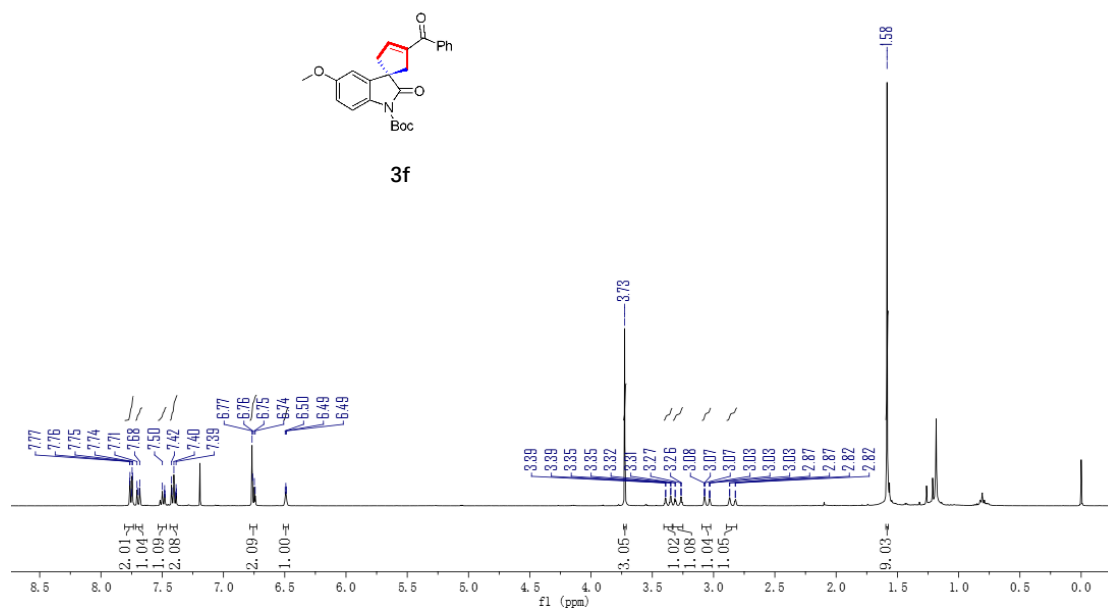

$^{13}\text{C}$  NMR of **3f** (126 MHz,  $\text{CDCl}_3$ )

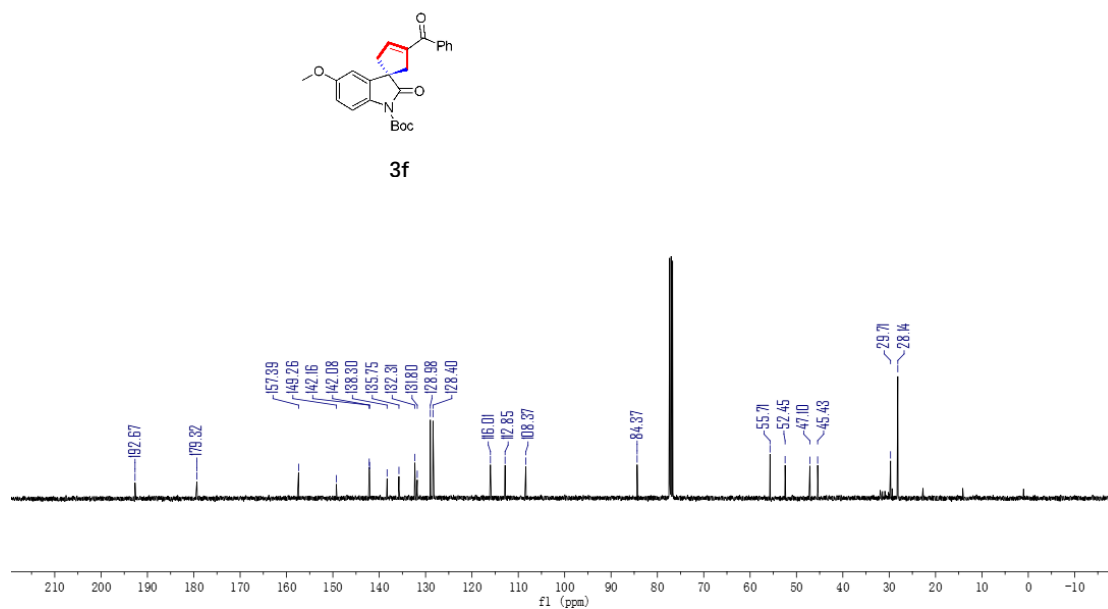





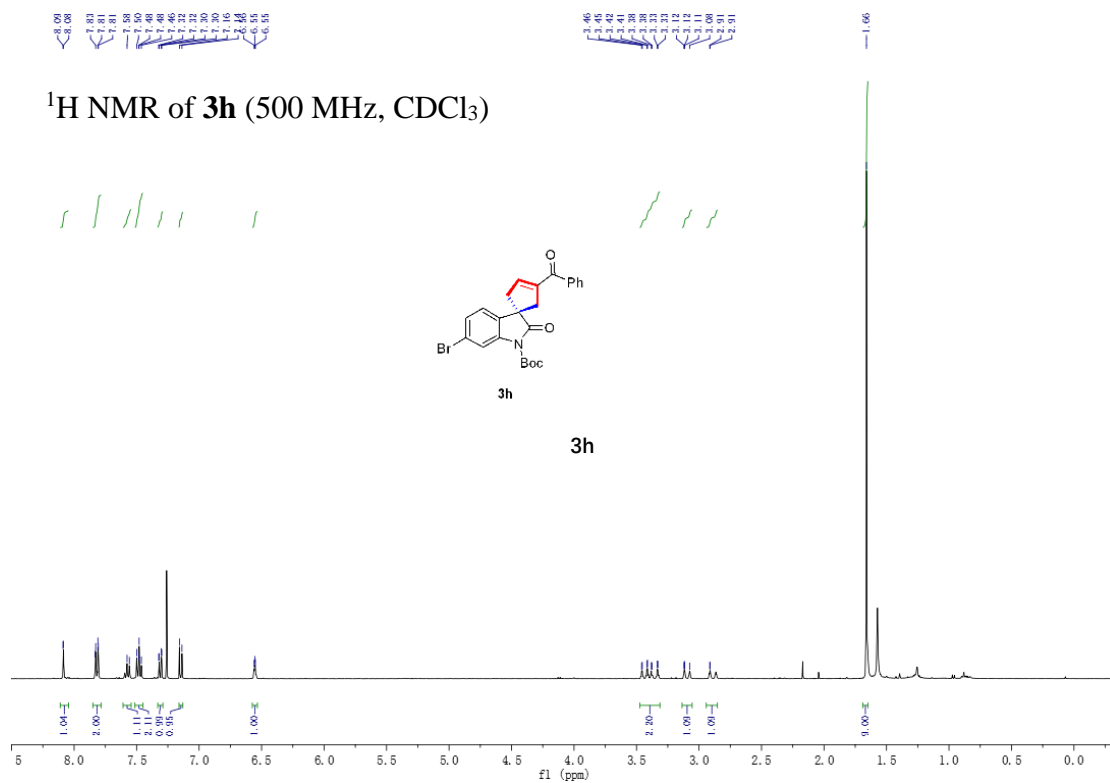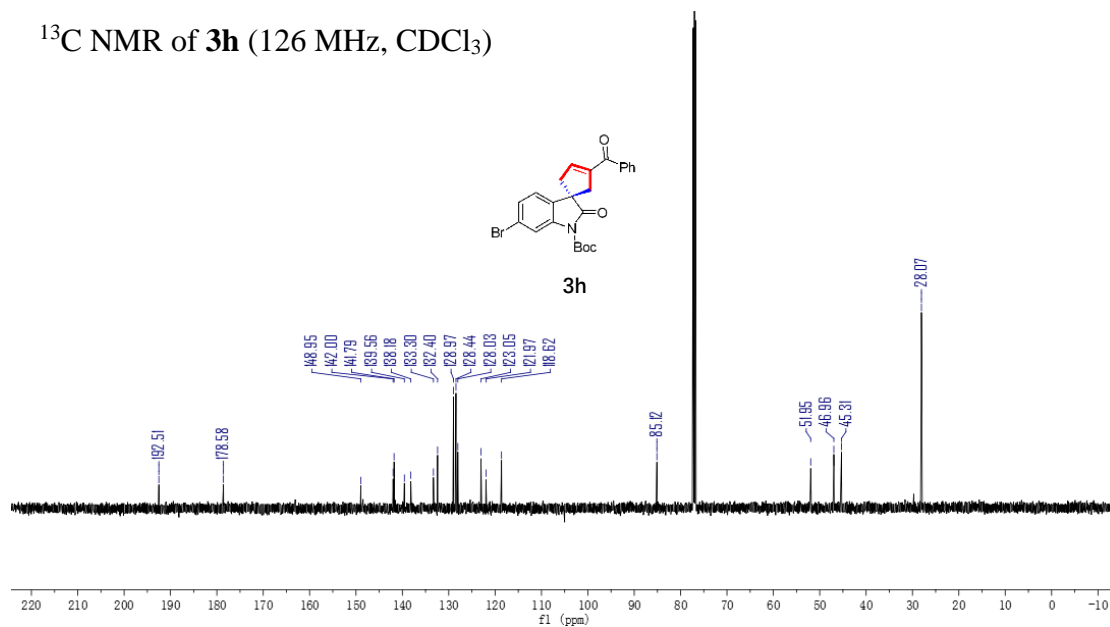

$^1\text{H}$  NMR of **3j** (500 MHz,  $\text{CDCl}_3$ )

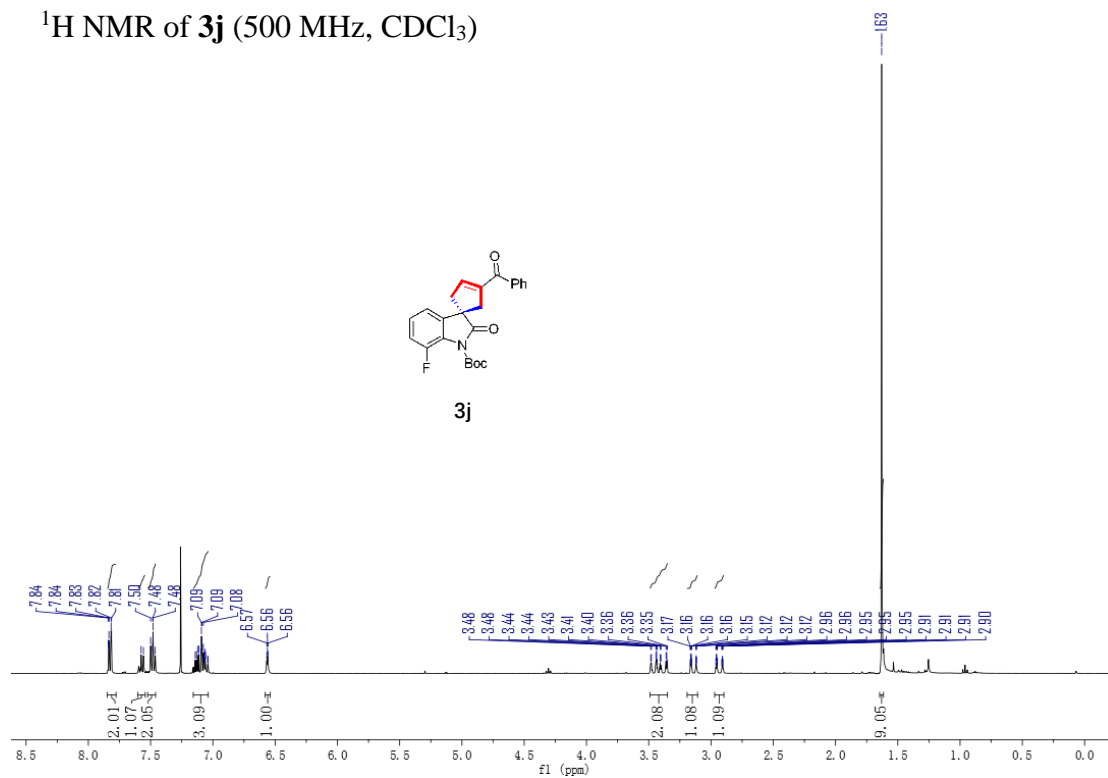

$^{13}\text{C}$  NMR of **3j** (126 MHz,  $\text{CDCl}_3$ )

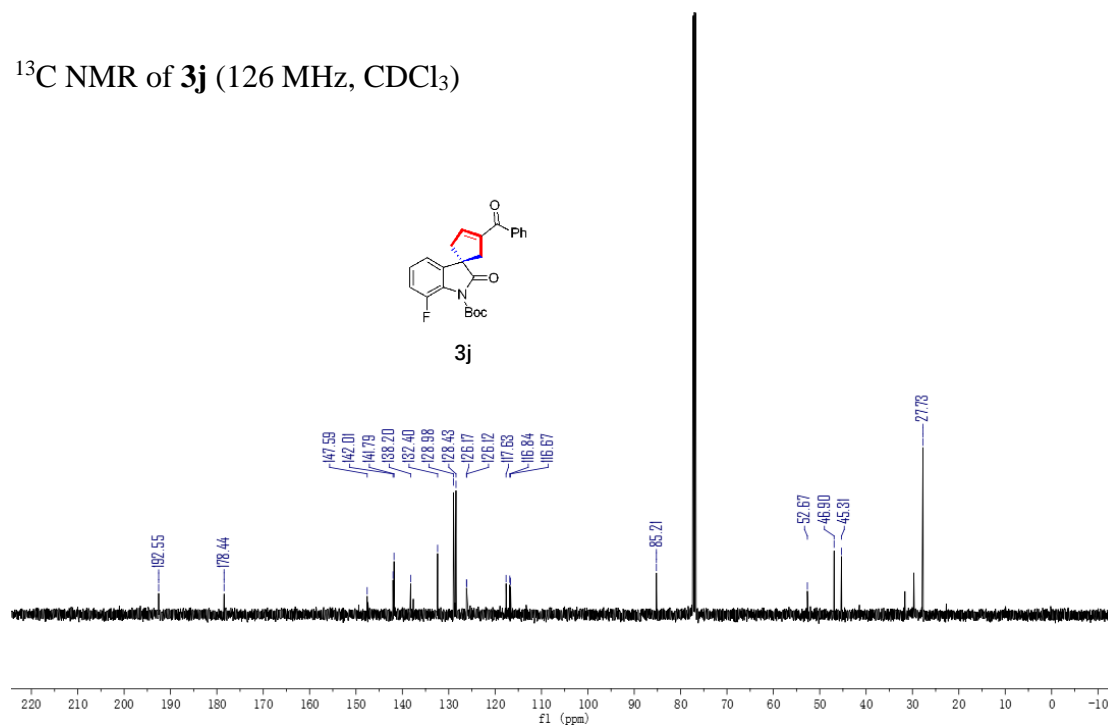

$^1\text{H}$  NMR of **3i** (500 MHz,  $\text{CDCl}_3$ )

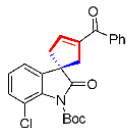

**3i**

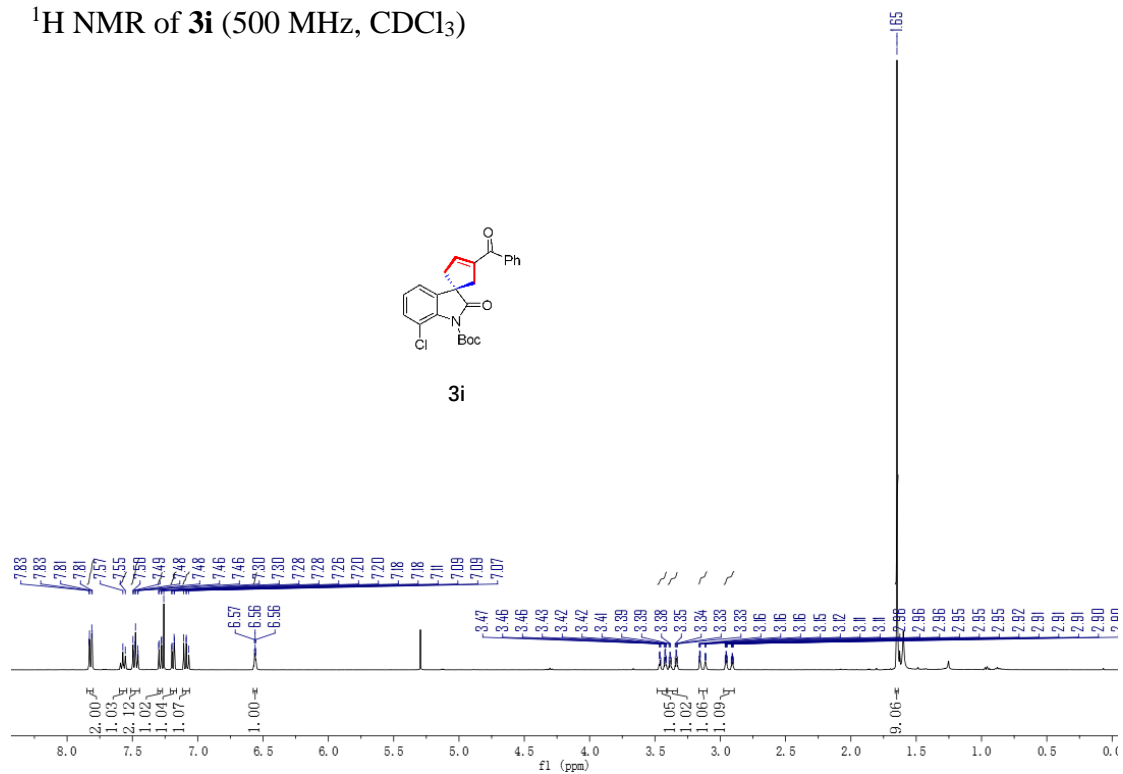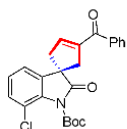

**3i**

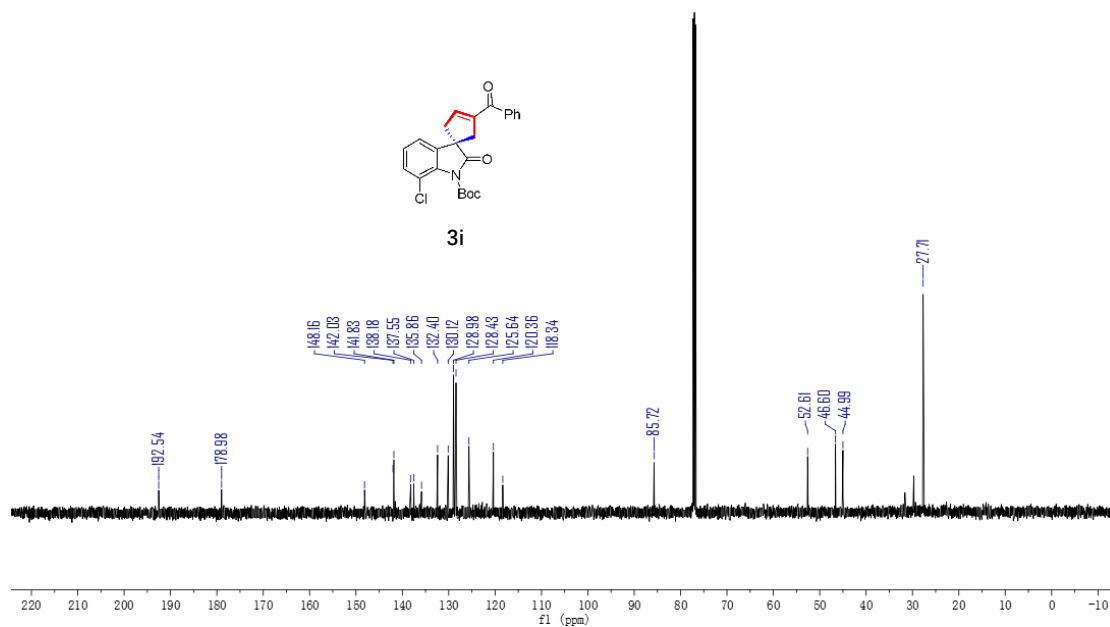

$^1\text{H}$  NMR of **3k** (500 MHz,  $\text{CDCl}_3$ )

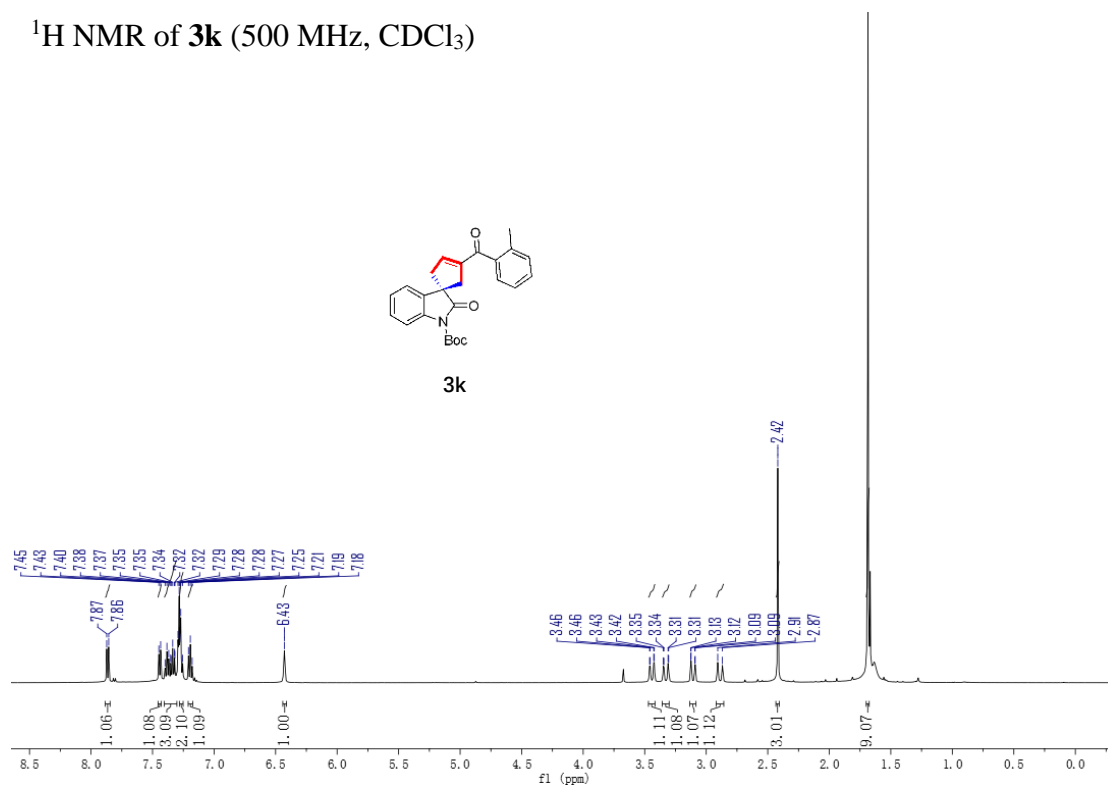

$^{13}\text{C}$  NMR of **3k** (126 MHz,  $\text{CDCl}_3$ )

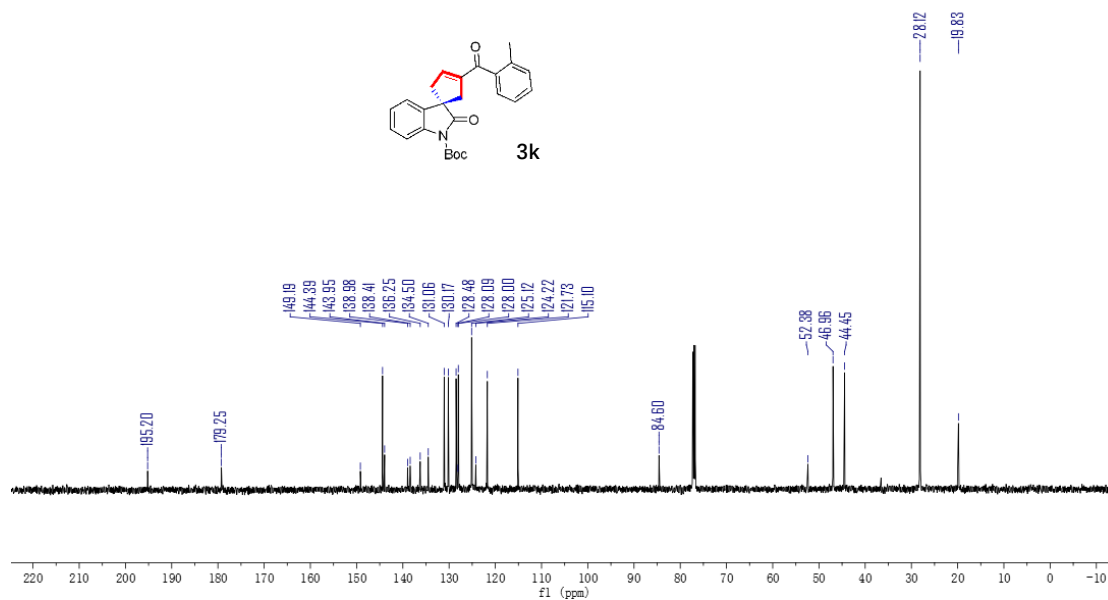

<sup>1</sup>H NMR of **31** (500 MHz, CDCl<sub>3</sub>)

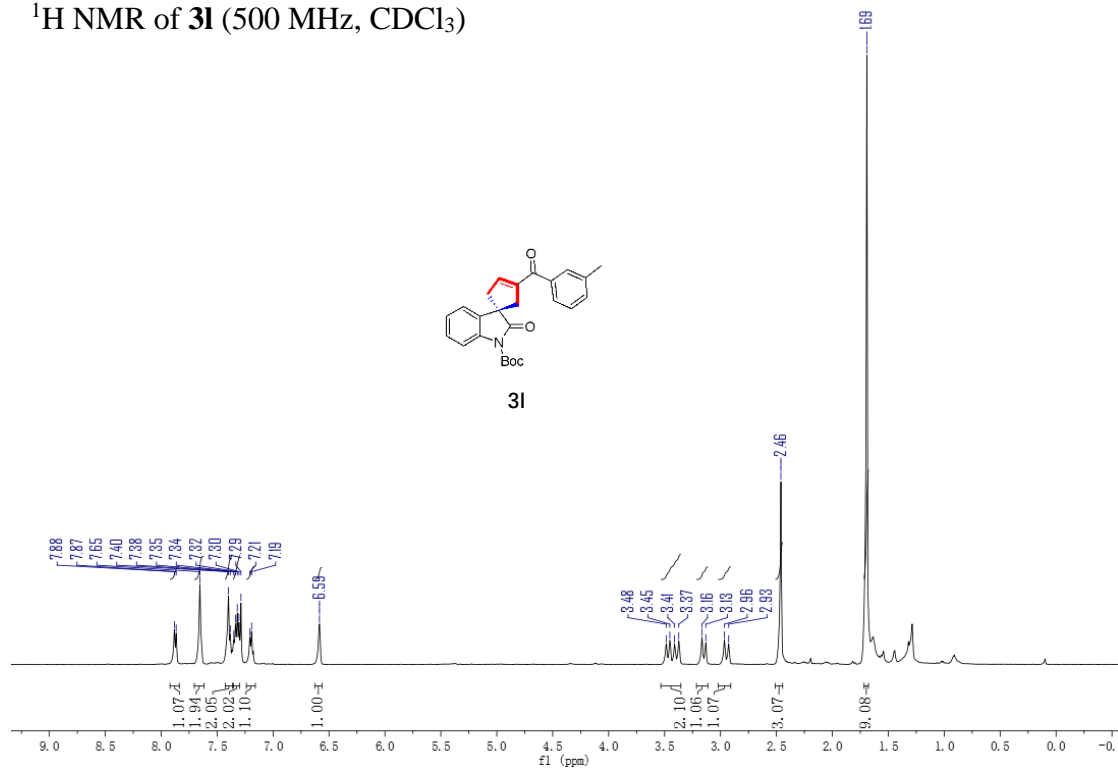

<sup>13</sup>C NMR of **31** (126 MHz, CDCl<sub>3</sub>)

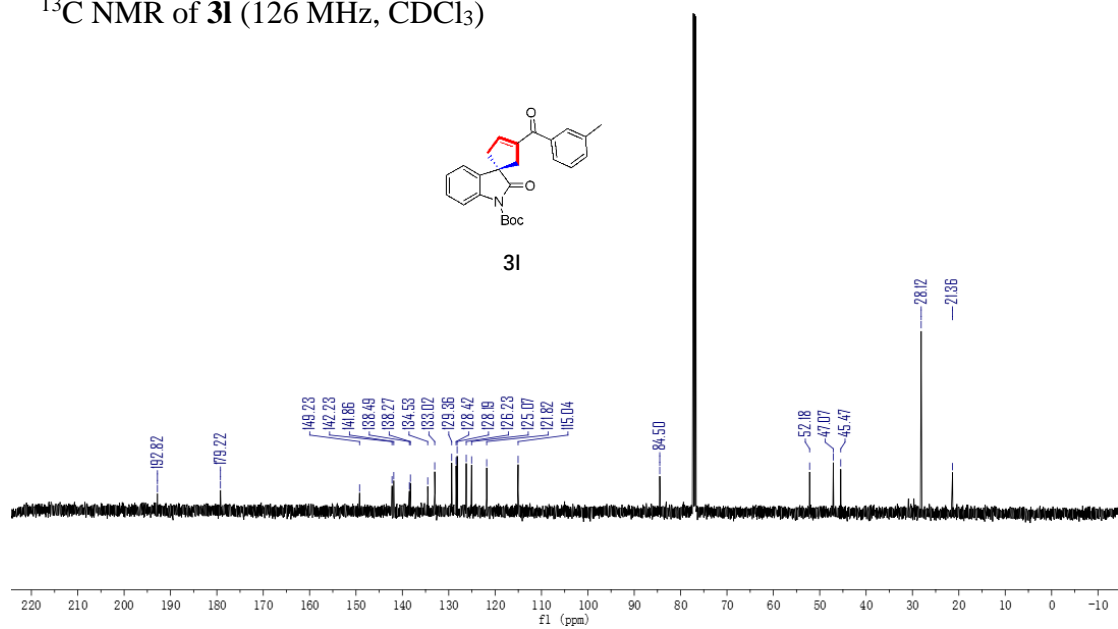



$^1\text{H}$  NMR of **3n** (500 MHz,  $\text{CDCl}_3$ )

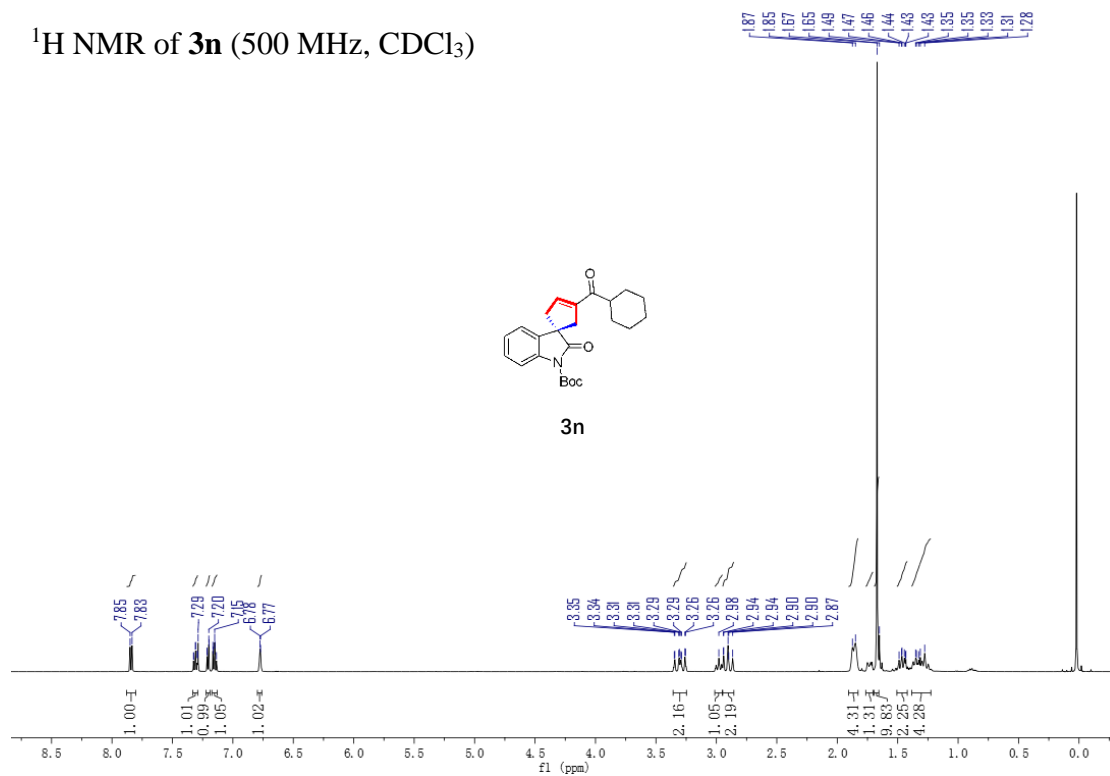

$^{13}\text{C}$  NMR of **3n** (126 MHz,  $\text{CDCl}_3$ )

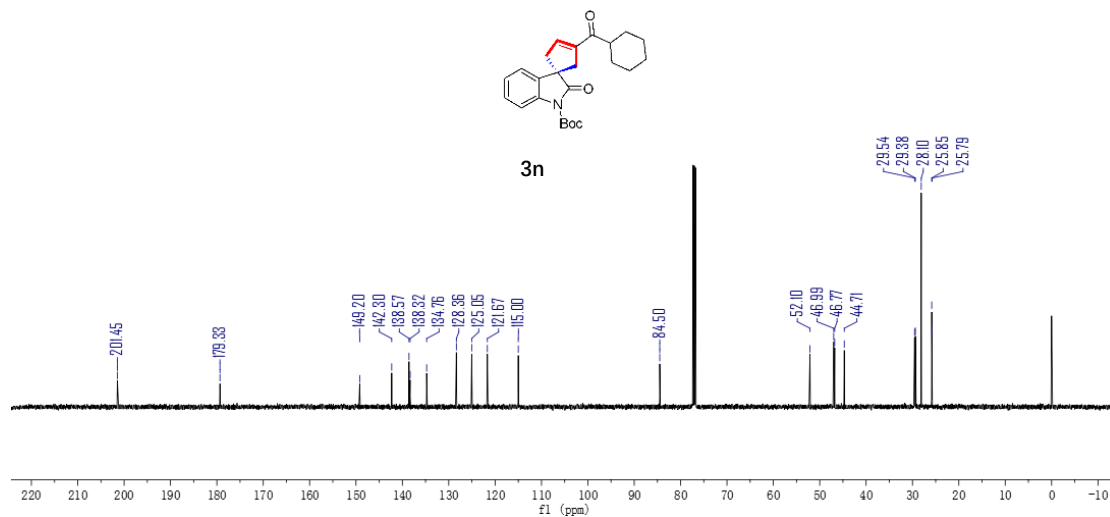



$^1\text{H}$  NMR of **3o** (500 MHz,  $\text{CDCl}_3$ )

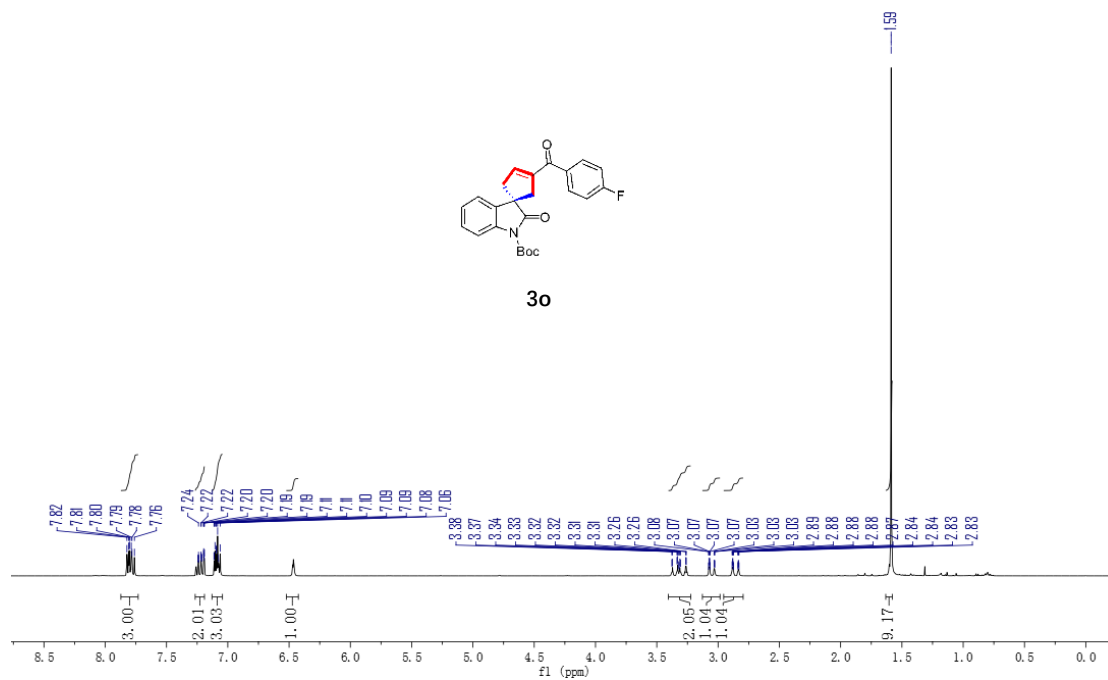

$^{13}\text{C}$  NMR of **3o** (126 MHz,  $\text{CDCl}_3$ )

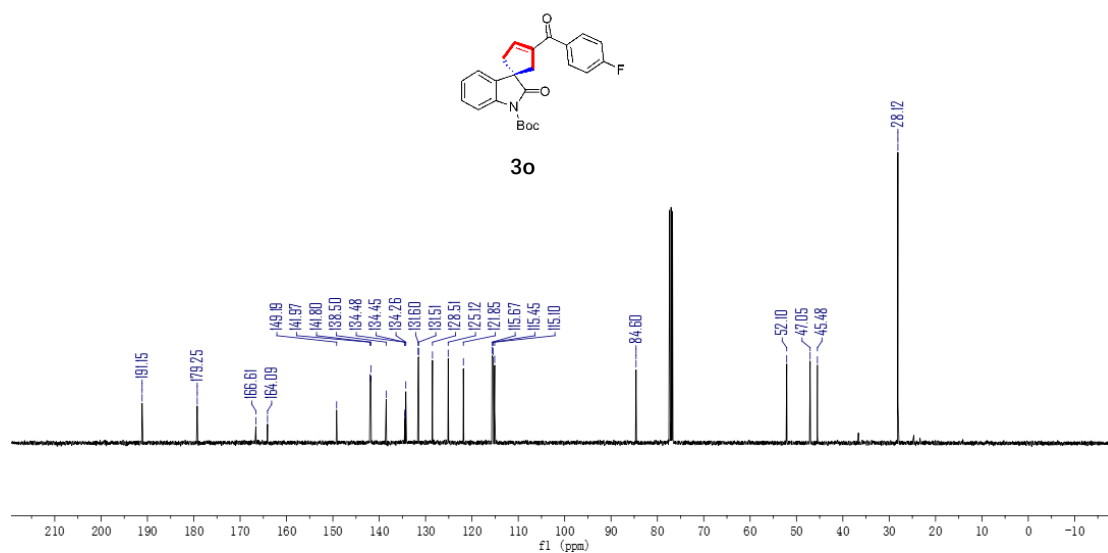

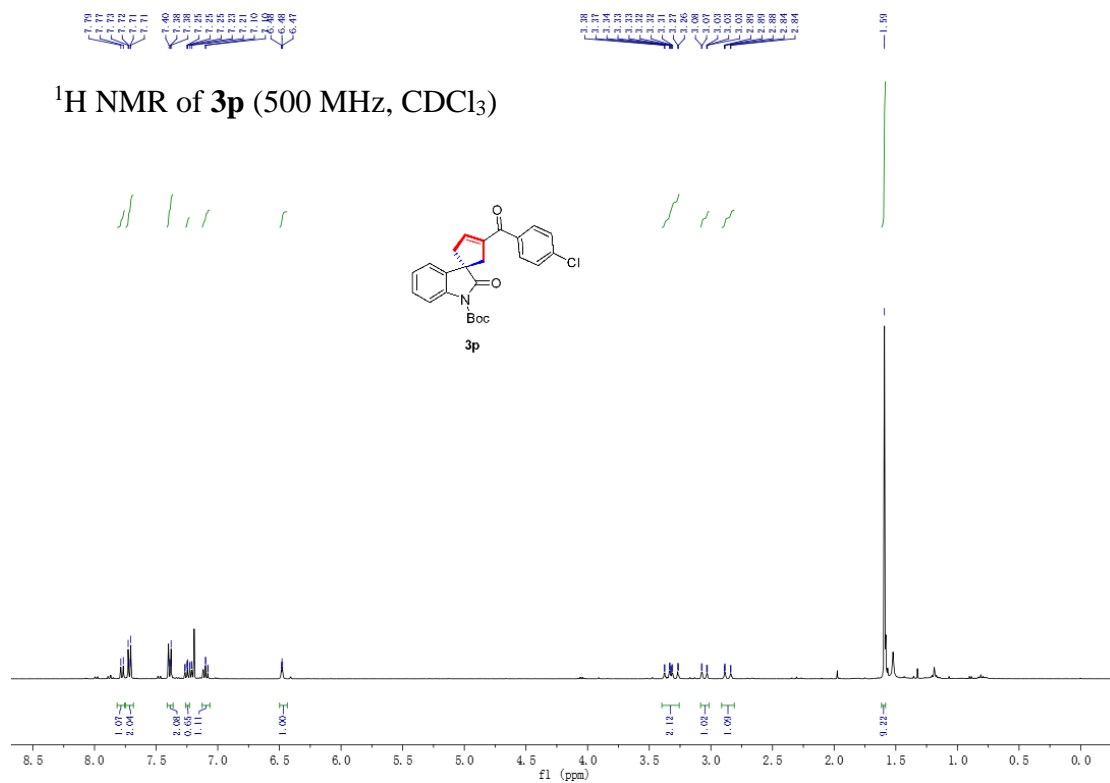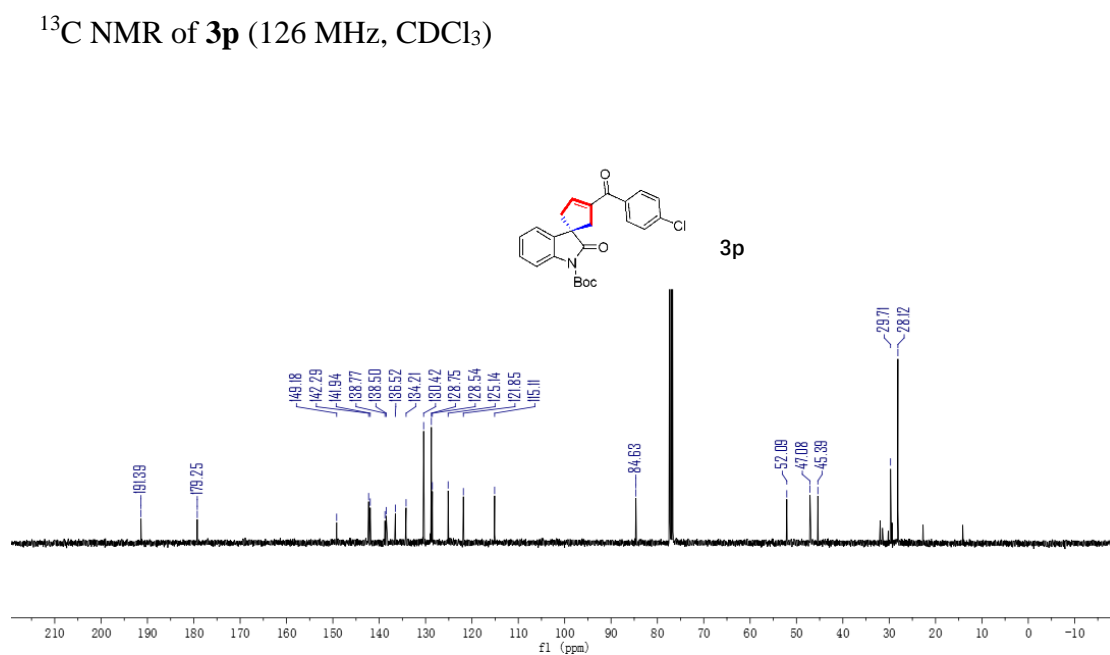

$^1\text{H}$  NMR of **3q** (500 MHz,  $\text{CDCl}_3$ )

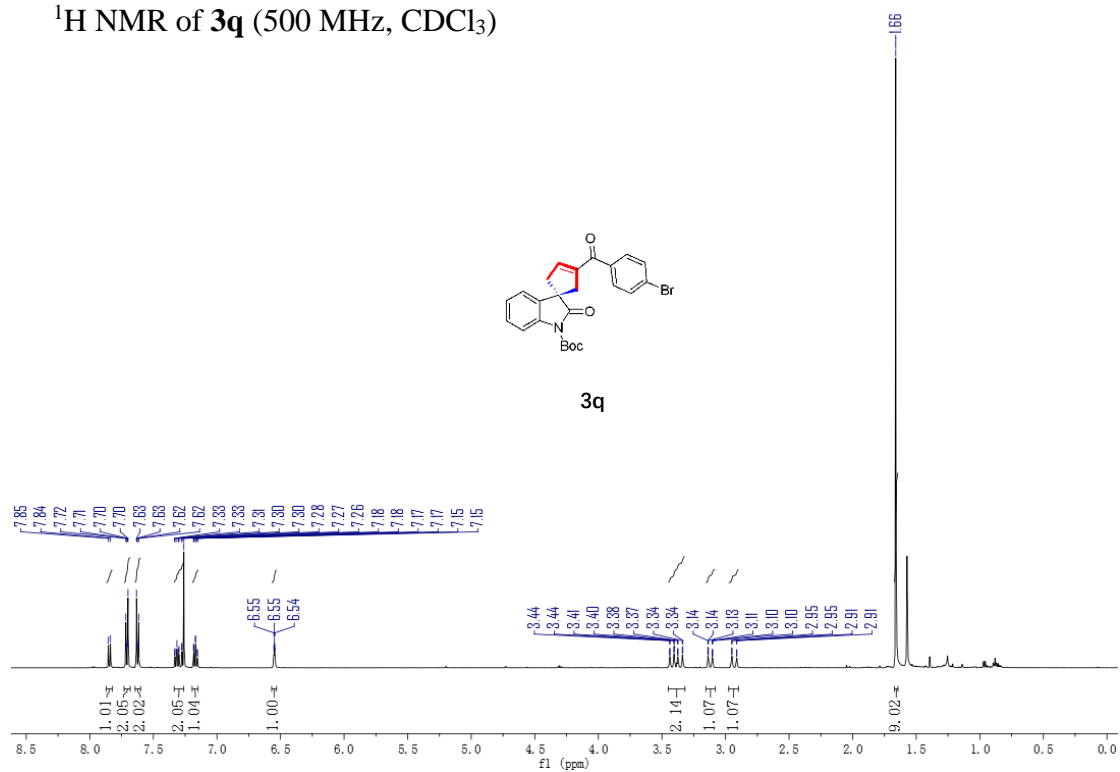

$^{13}\text{C}$  NMR of **3q** (126 MHz,  $\text{CDCl}_3$ )

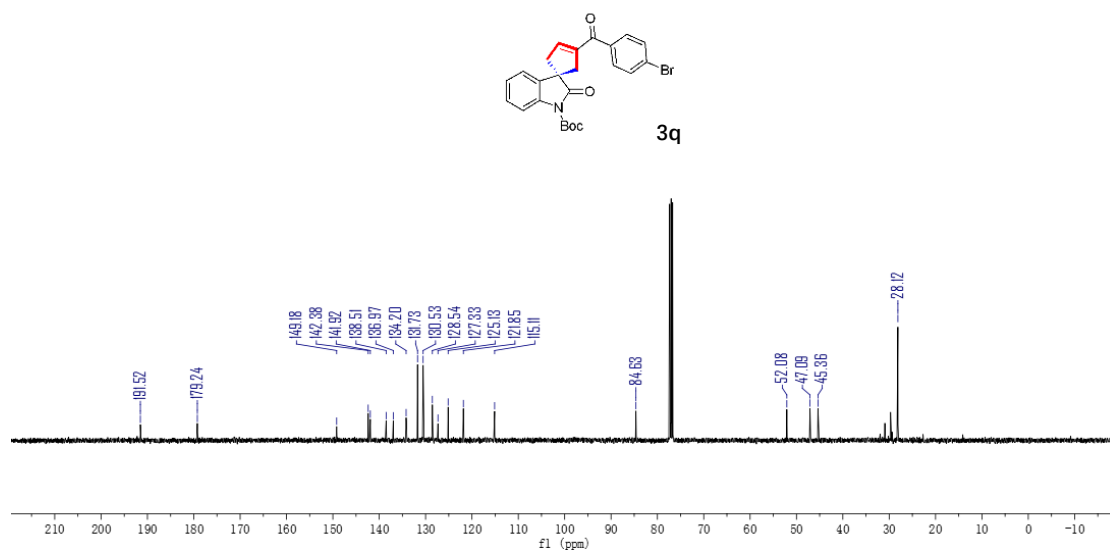

$^1\text{H}$  NMR of **4** (400 MHz,  $\text{CDCl}_3$ )

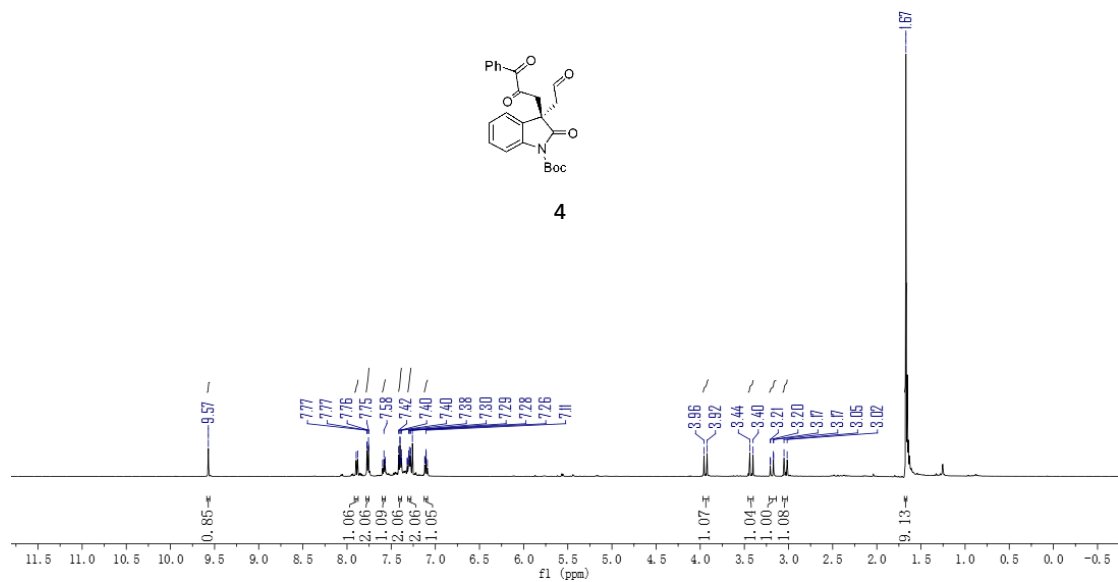

$^{13}\text{C}$  NMR of **4** (101 MHz,  $\text{CDCl}_3$ )

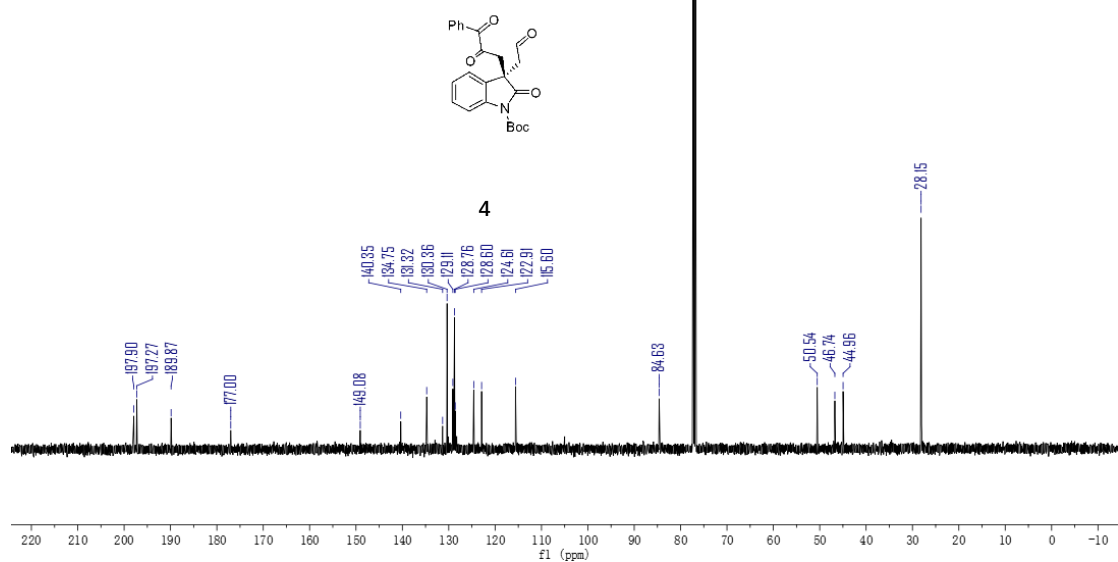

$^1\text{H}$  NMR of **5** (400 MHz,  $\text{CDCl}_3$ )

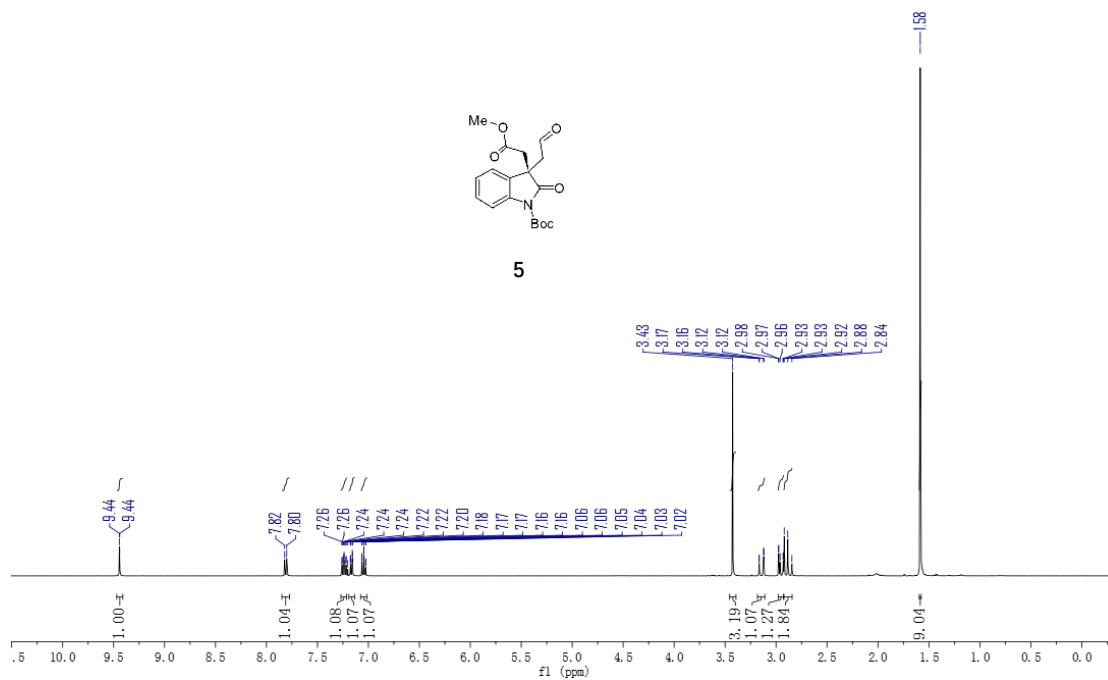

$^{13}\text{C}$  NMR of **5** (101 MHz,  $\text{CDCl}_3$ )

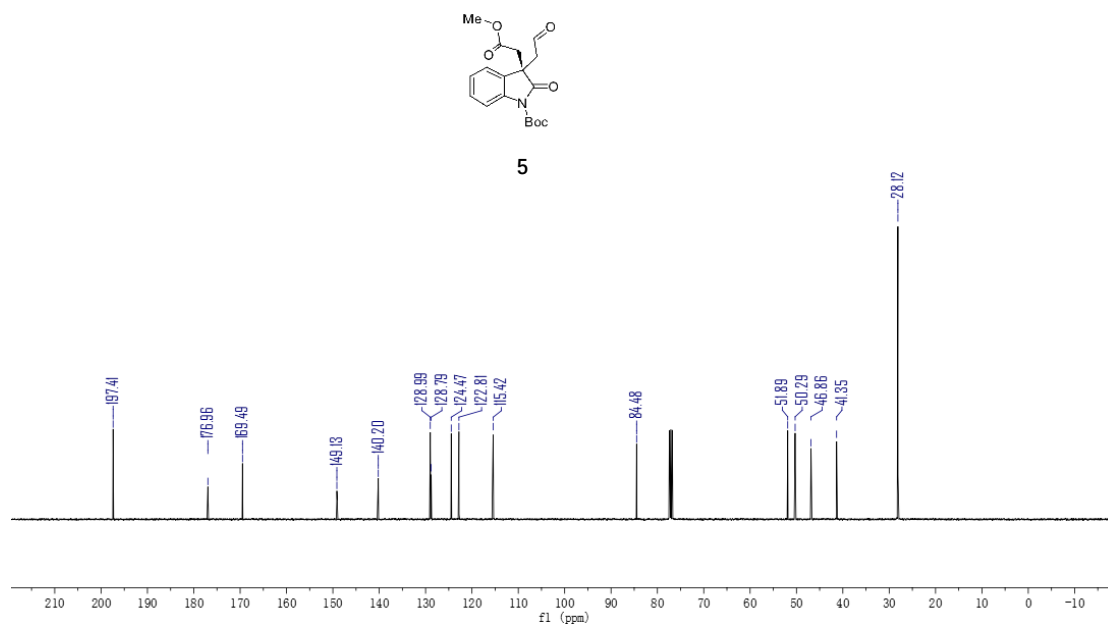

$^1\text{H}$  NMR of **6** (400 MHz,  $\text{CDCl}_3$ )

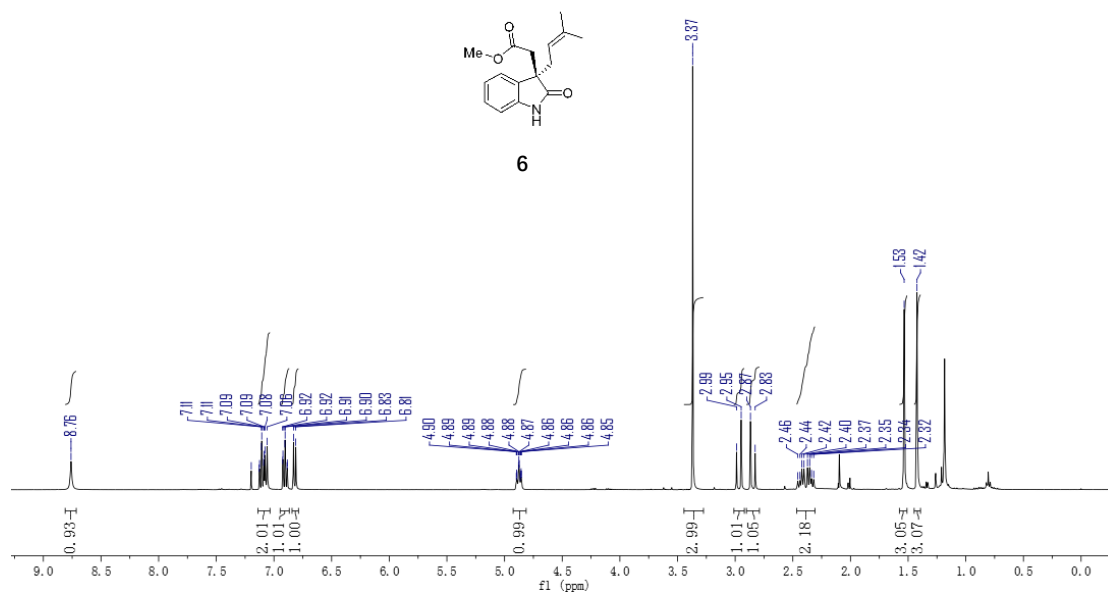

$^{13}\text{C}$  NMR of **6** (101 MHz,  $\text{CDCl}_3$ )

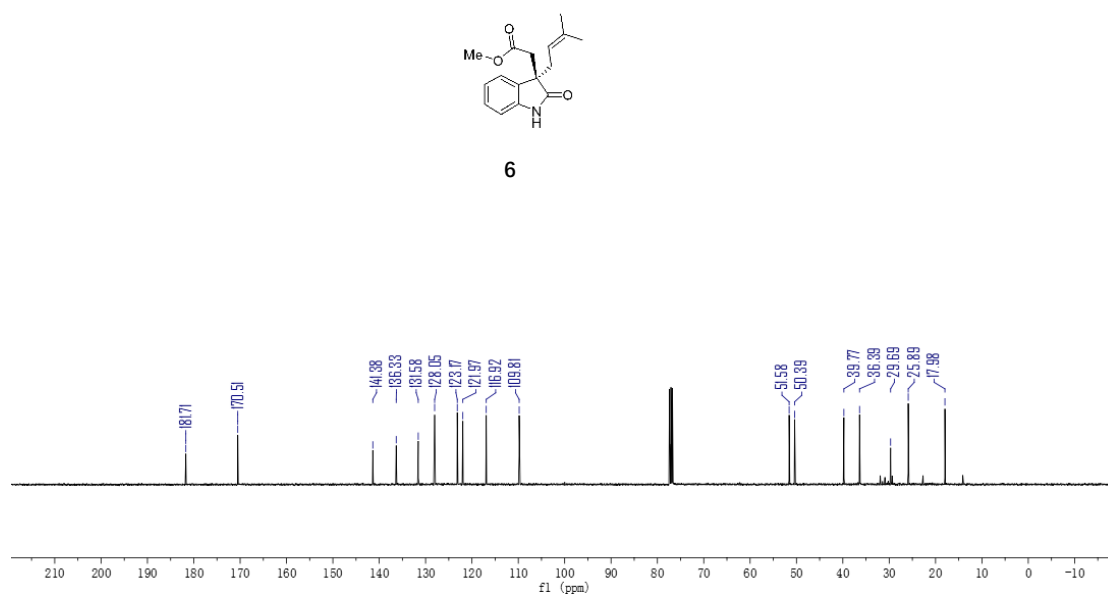

$^1\text{H}$  NMR of **7** (400 MHz,  $\text{CDCl}_3$ )

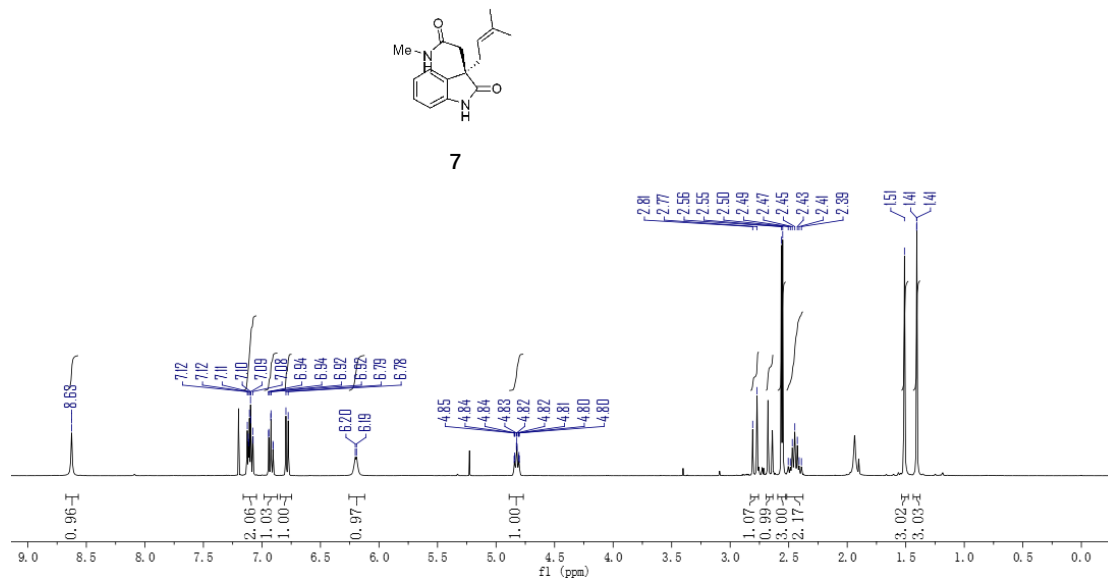

$^{13}\text{C}$  NMR of **7** (101 MHz,  $\text{CDCl}_3$ )

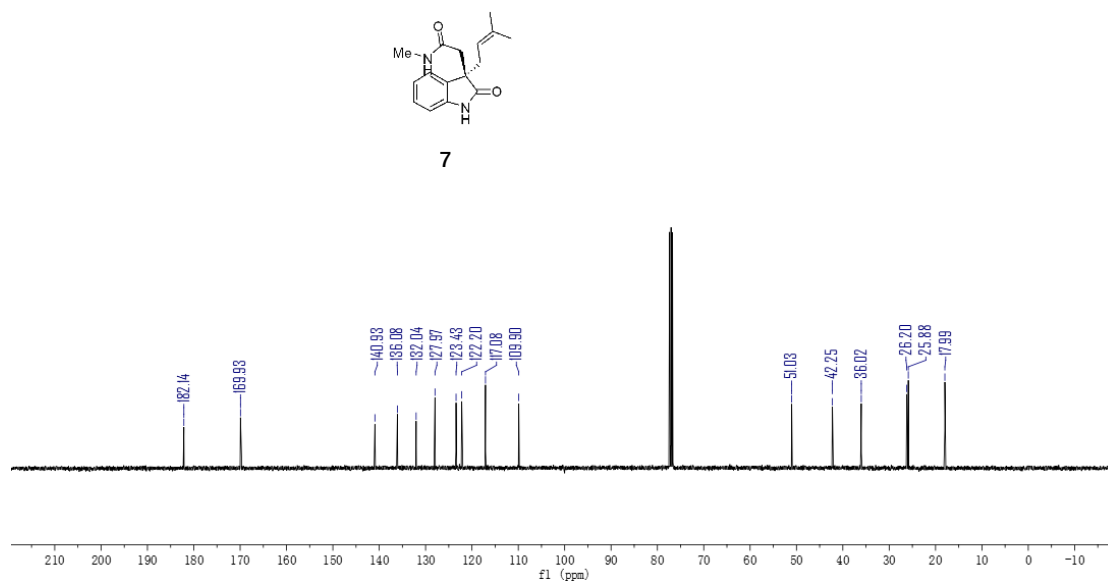





<sup>1</sup>H NMR of (+) - **Debromoflustramine B** (400 MHz, CDCl<sub>3</sub>)

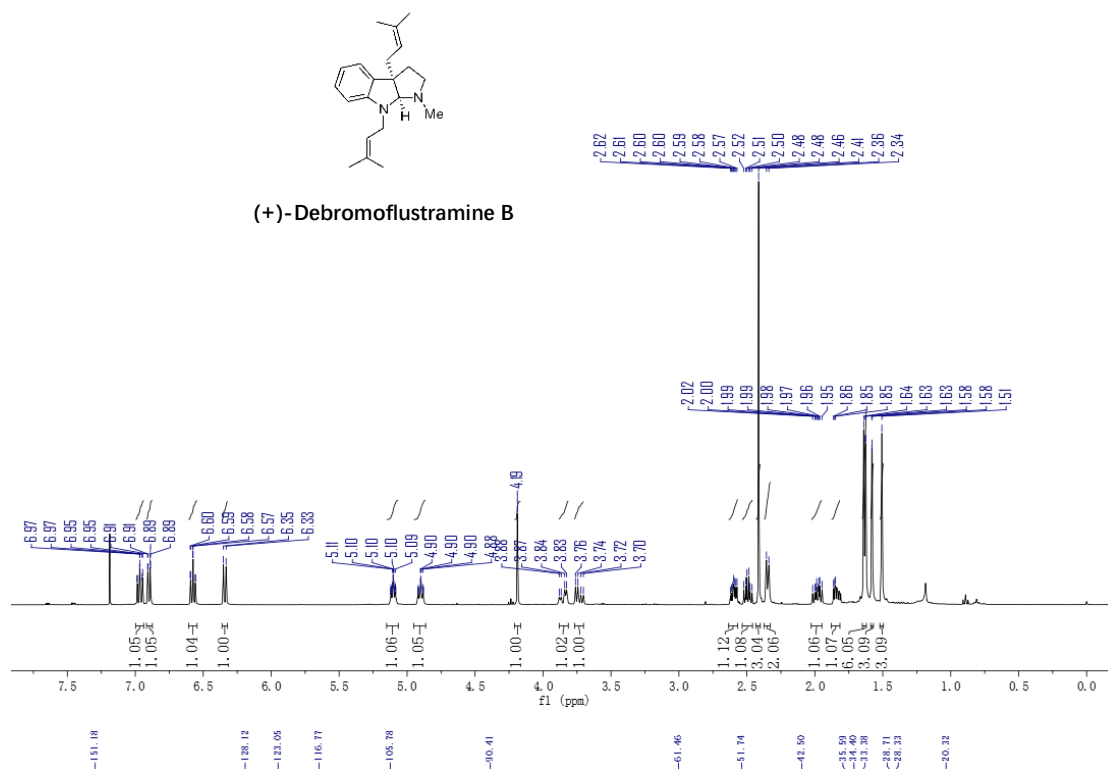

<sup>13</sup>C NMR of (+) - **Debromoflustramine B** (101 MHz, CDCl<sub>3</sub>)

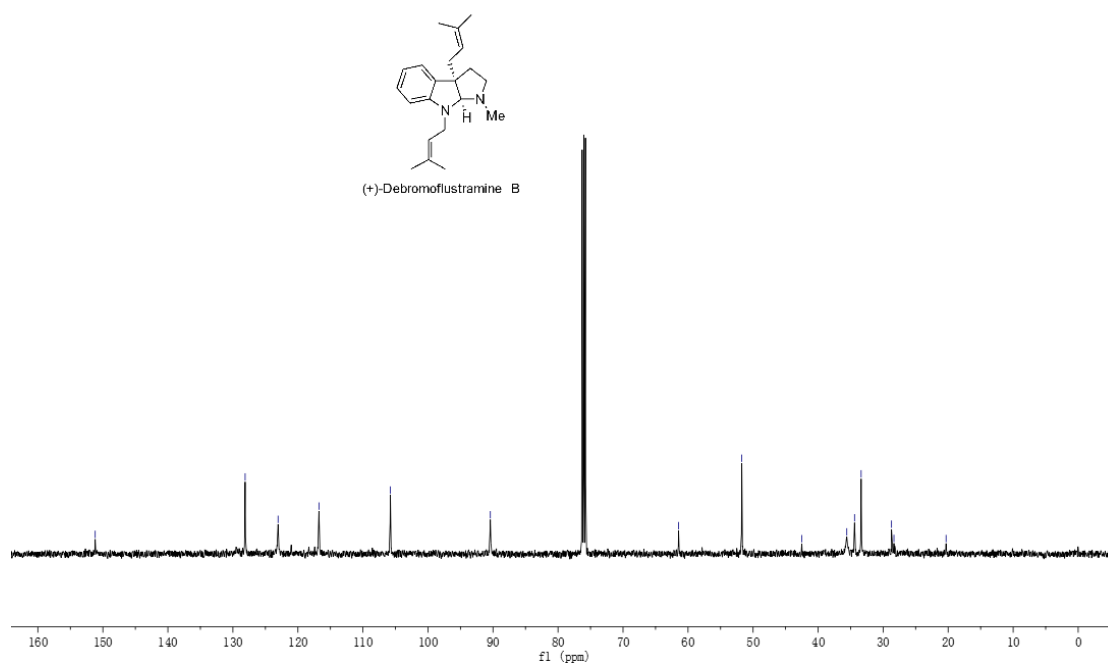

## F. References

[1] Han, X.; Wang, Y.; Zhong, F.; Lu, Y. Enantioselective [3 + 2] Cycloaddition of

Allenes to Acrylates Catalyzed by Dipeptide-Derived Phosphines: Facile Creation of Functionalized Cyclopentenes Containing Quaternary Stereogenic Centers. *J. Am. Chem. Soc.* 2011, **133**, 1726.

[2] Frost, J. R.; Huber, S. M.; Breitenlechner, S.; Bannwarth, C.; Bach, T. Enantiotopos-Selective C–H Oxygenation Catalyzed by a Supramolecular Ruthenium Complex. *Angew. Chem. Int. Ed.* 2015, **54**, 691.

[3] Tang, X. D.; Tan, C. X.; Chan, W. L.; Zhang, F. H.; Zheng, W. R.; Lu, Y. Dielectrophilic Allenic Ketone-Enabled [4 + 2] Annulation with 3,3'-Bisoxindoles: Enantioselective Creation of Two Contiguous Quaternary Stereogenic Centers. *ACS Cat.* 2021, **11**, 1361.

[4] Craig, R.; Sorrentino, E.; Connon, S. J. Enantioselective Alkylation of 2-Oxindoles Catalyzed by a Bifunctional Phase-Transfer Catalyst: Synthesis of (–)-Debromoflustramine B. *Chem. Eur. J.* 2018, **24**, 4528–4531.
